1 **Specific type 1 diabetes risk genes underpin age-at-diagnosis and indicate joint**  
2 **defects in immunity, beta-cell fragility and responses to viral infections in early-**  
3 **onset disease.**

4 *Inshaw JRJ, Cutler AJ, Crouch DJM, Wicker LS and Todd JA*

5

6 JDRF/Wellcome Diabetes and Inflammation Laboratory, Wellcome Centre for

7 Human Genetics, University of Oxford, United Kingdom

8

9

10

11

12

13

14

15 **Corresponding authors:** Mr Jamie Inshaw, Professor John Todd

16 JDRF/Wellcome Diabetes and Inflammation Laboratory,

17 Wellcome Centre for Human Genetics,

18 NIHR Oxford Biomedical Research Centre,

19 Nuffield Department of Medicine,

20 Roosevelt Drive,

21 Oxford,

22 OX3 7BN

23 01865 287859

24 [jinshaw@well.ox.ac.uk](mailto:jinshaw@well.ox.ac.uk)

25 [jatodd@well.ox.ac.uk](mailto:jatodd@well.ox.ac.uk)

## 26 **Abstract**

### 27 **Background**

28 Immunohistological analyses of pancreata from patients with autoimmune type 1  
29 diabetes (T1D) suggest a stratification of islet pathology of both B and T lymphocyte  
30 islet inflammation common in children diagnosed under age 7 years, whereas B cells  
31 are rare in those diagnosed age  $\geq 13$ . Based on these observations, we would expect to  
32 see genetic susceptibility differences between these age-at-diagnosis groups at the  
33 population level. Moreover, these genetic susceptibility differences could inform us  
34 on the aetiology of this most aggressive form of T1D that initiates in the first years of  
35 life.

### 36 **Methods**

37 Using multinomial logistic regression models we tested if the known T1D loci (17  
38 within the human leucocyte antigen (HLA) region and 55 others, non HLA regions)  
39 had significantly stronger effect sizes in the  $<7$  group compared to the  $\geq 13$  group,  
40 using genotype data from 26,991 individuals (18,400 controls, 3,111 T1D diagnosed  
41  $<7$  years of age, 3,759 at 7-13 and 1,721 at  $\geq 13$ ).

### 42 **Findings**

43 Six associations of the HLA class II and I genes had stronger effects in the  $<7$  group,  
44 and seven non-HLA regions, one of which functions specifically in beta cells  
45 (*GLIS3*), and the other six likely affecting key T cell (*IL2RA*, *IL10*, *SIRPG*), thymus  
46 (*PTPRK*) and B cell development/functions (*IKZF3*, *IL10*) or in both immune cells  
47 and beta cells (*CTSH*).

### 48 **Interpretation**

49 In newborn children with the greatest load of certain HLA and non-HLA risk alleles,  
50 inherited variants in immune and beta cells, and their inherent dysregulated response

- 51 to environmental stresses such as virus infection, combine to cause a rapid loss of
- 52 insulin production, thereby driving down the age at which T1D is diagnosed.

53 **Abbreviations**

54 **T1D:** Type 1 diabetes

55 **HLA:** Human leukocyte antigen

56 **FDR:** False discovery rate

57 **eQTL:** Expression quantitative trait loci

58 **NIDDK:** The National Institute of Diabetes and Digestive and Kidney Diseases

59 **NIAID:** The National Institute of Allergy and Infectious Diseases

60 **NHGRI:** The National Human Genome Research Institute

61 **NICHD:** The National Institute of Child Health and Human Development

62 **JDRF:** The Juvenile Diabetes Research Foundation

63 **GRID:** Genetic resource investigating diabetes

64 **IDDMGEN:** Tyypin 1 Diabetekseen Sairastuneita Perheenjäsenineen □

65 **T1DGEN:** Tyypin 1 Diabetekseen Genetiikka

66 **T1DGC:** Type 1 diabetes genetics consortium

67 **IFN:** Interferon

## 68 **Introduction**

69 Type 1 diabetes (T1D) is a multifactorial disease in which the insulin-producing beta  
70 cells of pancreatic islets are destroyed or rendered dysfunctional by an autoimmune  
71 process that often initiates in the first few months of life, causing a pre-diabetic, non-  
72 symptomatic state in approximately 0.4% of children <sup>1</sup>. The actual diagnosis could  
73 happen many years after this prodromal phase, the joint environmental and genetic  
74 mechanisms of which remain ill defined, with the median age-at-diagnosis being  
75 around age 11 years. Even after diagnosis there is still often sufficient endogenous  
76 insulin production to lower insulin treatment and reduce the later in life complications  
77 of early mortality, cardiovascular, kidney, eye and peripheral neuron disease <sup>2</sup>. The  
78 exceptions to this are the children diagnosed with T1D under the age 10 years in  
79 whom there is little insulin production shortly after diagnosis, as measured by  
80 circulating C-peptide concentrations <sup>2,3</sup>. This subgroup represents the largest unmet  
81 clinical challenge, since they suffer the greatest complications of the disease <sup>3</sup>. Yet  
82 any intervention of T1D autoimmunity in these young children must be as safe and  
83 precise as possible, modulating the causative molecules, cells, pathways and  
84 mechanisms. Hence we need to identify the specific mechanisms underlying early-  
85 diagnosed T1D.

86 Recent evidence suggests that children diagnosed under age 7 years may have a  
87 different, more aggressive form of islet inflammation (insulitis), characterised by a B  
88 lymphocyte infiltrate coincident with a T cell insulitis (CD4<sup>+</sup> and CD8<sup>+</sup> T cells), than  
89 children aged 13 years and over, who have reduced B cell participation <sup>4</sup>. In cases  
90 diagnosed between 7 and 12 years there is a mixture of islet infiltrate phenotypes,  
91 some with the “under 7” B cell infiltrate and others with “13 and over” phenotype.

92 There is already evidence that some genetic variants reduce age-at-diagnosis, which  
93 provides insight into the biology of this most beta-cell destructive form of the disease  
94 <sup>5-8</sup>. The autoantigen-presenting genes human leukocyte antigen (HLA) class II and  
95 class I are the major drivers of younger age-at-diagnosis. Class II molecules are  
96 recognised by CD4<sup>+</sup> T cells which provide help for CD8<sup>+</sup> beta-cell cytotoxic T cells  
97 and islet antigen-specific B cells. Class I molecules are expressed on beta cells,  
98 upregulated during viral infection or by immune cytokines, rendering them more  
99 susceptible to autoreactive CD8<sup>+</sup> T cells. More recently, a genome-wide association  
100 genetic analysis of age-at-diagnosis of T1D identified a locus on chromosome  
101 6q22.33 that acts almost exclusively in the cases of T1D diagnosed under age 5 years  
102 <sup>9</sup>, encoding the protein tyrosine phosphatase receptor kappa (*PTPRK*) and thymocyte-  
103 expressed molecule involved in selection (*THEMIS*) genes. However, this approach  
104 has to meet the stringent genome-wide multiple testing correction criterion ( $p < 5 \times$   
105  $10^{-8}$ ) and informative, true signals were likely to have been missed. In the present  
106 study, we analysed the association of specified known T1D gene regions, thereby  
107 reducing the multiple testing burden. In addition, a biological or phenotypic prior  
108 could provide greater sensitivity in the search for age-at-diagnosis-associated genes.  
109 The stratification of patients into age-at-diagnosis categories according to their  
110 pancreatic histology, as opposed to treating age-at-diagnosis as a continuous  
111 phenotype provides us with just this opportunity.  
112 Here, we analysed T1D-associated variants according to the proposed pancreatic  
113 infiltrate stratification of T1D, namely the age-at-diagnosis groups, the under 7's  
114 versus the 13's and over. If T1D has a particular pancreatic immunophenotype then it  
115 might be expected that it could have distinct genetic features, characterised by  
116 susceptibility genes with larger effects in the under 7's. Moreover, the intermediate

117 group, age-at-diagnosis 7-13 years, would have risk for these age-at-diagnosis-  
118 sensitive genes lying between the under 7's and the 13's and over. Six HLA  
119 haplotypes/alleles and seven non-HLA loci fulfil this risk profile informing the  
120 biology of the most aggressive form of T1D, revealing a mixture of predisposition in  
121 both the beta cell and immune cell compartments.

## 122 **Methods**

### 123 **Study populations**

124 Our dataset consists of 18,400 controls, 3,111 T1D cases diagnosed at <7 years (the  
125 <7 group), 3,759 at  $\geq 7$  to <13 years (the 7-13 group) and 1,721 at  $\geq 13$  years (the  $\geq 13$   
126 group). The majority of individuals are from the UK, with others from central Europe,  
127 Asia-Pacific, Finland and the USA (Table 1), and comprises only unrelated  
128 individuals, since related individuals were removed (Supplementary methods).

### 129 **Loci studied**

130 We examined eight HLA class II haplotypes and nine HLA class I classical alleles for  
131 their association with T1D diagnosed at each age group, where the haplotypes and  
132 classical alleles were a subset of the most protective and susceptible haplotypes  
133 identified for T1D to date<sup>10</sup> that we also found to be associated with T1D in our  
134 analysis after conditioning for the other associated HLA haplotypes (logistic  
135 regression Wald test  $p < 0.01$ ). Supplementary Table 1 summarises which haplotypes  
136 and classical alleles were examined, how they were defined and whether they were  
137 common enough to include in our analysis, defined as at least 5 individuals from each  
138 group with the classical allele/haplotype.

139 We also examined 55 loci outside the HLA, which have previously shown association  
140 with T1D (Supplementary Table 2). Each locus contains an 'index' variant, chosen to  
141 be the most strongly disease associated from a set of variants in linkage  
142 disequilibrium (LD) that constitute a single genetic signal. We have allocated locus  
143 names to each of these variants based on a candidate gene(s), but the named genes  
144 may not be causal for T1D.

### 145 **Imputation**



146 Classical HLA alleles as well as non-HLA variants that were excluded due to variant  
147 quality control filtering were imputed for analysis (Supplementary methods). Some  
148 individuals were genotyped for a subset of their classical HLA alleles<sup>8</sup> and therefore  
149 accuracy of imputation was assessed at those classical alleles for a proportion of  
150 individuals.

### 151 **Multinomial logistic regression**

152 In order to examine whether or not there was heterogeneity in effect size for each  
153 examined variant between the  $<7$  and  $\geq 13$  groups, we fitted two multinomial logistic  
154 regressions per locus, one assuming identical effect sizes for the genetic variant in the  
155  $<7$  and  $\geq 13$  groups and the other allowing different effect sizes between groups. A  
156 comparison of how well these models fit the data allows us to test for heterogeneity in  
157 effect size between the two groups. Both models were adjusted for the ten largest  
158 principal components derived from the set of ImmunoChip variants passing quality  
159 control filters (Supplementary methods).

160 To test stability of our results at non-HLA loci, we did four sensitivity analyses.  
161 Firstly, we sampled without replacement 50% of cases and controls from each of the  
162 ancestry groups in our collection. In lieu of a valid replication dataset, to assess the  
163 possibility that age-at-diagnosis genetic heterogeneity was due to an unlikely chance  
164 distribution of genotypes between age strata, we repeated the heterogeneity test, for  
165 the 50% that were sampled and also on the remaining 50%. We performed this  
166 procedure 100 times, giving us 200 heterogeneity tests and noted the proportion of  
167 times the variant under consideration reached nominally significant heterogeneity  
168 ( $p < 0.05$ ). Secondly, to exclude the possibility of spurious associations due to  
169 population structure in our data, we repeated the analysis but only including  
170 individuals from the UK and Northern Ireland and adjusted for the five largest

171 principal components derived from ImmunoChip data in these individuals only.  
172 Finally, to test sensitivity of our results to age-strata thresholds, we performed the  
173 same analysis but instead compared individuals diagnosed at  $<6$  years to the  $\geq 13$   
174 group and also individuals diagnosed at  $<5$  years compared to the  $\geq 13$  group.  
175 We declared a locus differentially-associated if the heterogeneity p-value was  
176 associated to a False Discovery Rate (FDR) of  $<0.1$ . To explore whether there were  
177 more age-at-diagnosis associated variants which we cannot detect in the present  
178 analysis due to a lack of statistical power, we examined all loci which did not reach  
179 the association threshold (FDR $<0.1$ ) and counted how many loci had the largest effect  
180 in the  $<7$  group, the intermediate effect in the 7-13 group and the smallest effect in the  
181  $\geq 13$  group and compared this to the expected frequency of this ordering using a  
182 binomial test (Supplementary methods).

### 183 **Fine mapping**

184 For each non-HLA locus with strong evidence of heterogeneity between age-at-  
185 diagnosis groups, as determined by Bonferroni correction, a more conservative  
186 multiple-comparison correction than FDR, we fine mapped a 0.5 Mb region around  
187 the index variant to identify a list of potentially causal variants for T1D diagnosed at  
188  $<7$  years. Analysis was limited to individuals from the UK and Northern Ireland,  
189 amounting to 2,888 cases diagnosed at  $<7$  years and 11,064 controls, in order to  
190 examine a homogeneous population, as fine mapping is sensitive to differences in LD  
191 structure between ancestrally divergent groups. We used the GUESSFM software,<sup>11</sup>  
192 which carries out a Bayesian variable selection stochastic search to identify the  
193 combinations of variants constituting separate genetic susceptibility to T1D. We then  
194 examined whether the T1D-associated variants colocalised with expression  
195 quantitative trait loci (eQTL) associations in whole blood from a dataset of over

196 30,000 individuals, gauging which genes the variants are most likely to be regulating  
197 and in what direction the effects are on gene transcription and disease risk<sup>12</sup> (eQTL  
198 statistics downloaded from <http://www.eqtlgen.org/cis-eqtls.html>) (Supplementary  
199 methods).  
200 The scripts used to analyse these data are available at  
201 [https://github.com/jinshaw16/AAD\\_t1d](https://github.com/jinshaw16/AAD_t1d),  
202 commit 1727d18c3fe2559ac527681142155b83e8294165.

### 203 **Funding**

204 This work was funded by the JDRF (9-2011-253, 5-SRA-2015-130-A-N) and  
205 Wellcome (091157, 107212) to the Diabetes and Inflammation Laboratory, University  
206 of Oxford.  
207 We use data generated by the Wellcome Trust Case Control Consortium (076113).  
208 The Northern Irish GRID, IDDMGEN, T1DGEN and Warren cohorts were genotyped  
209 using the T1DGC grants from the NIDDK, the NIAID, the NHGRI, the NICHD and  
210 the JDRF (U01 DK062418, JDRF 9-2011-530).

## 211 **Results**

### 212 **Multinomial logistic regression: HLA**

213 We found six HLA haplotypes to be differentially-associated between the  $<7$  and  $\geq 13$   
214 group (FDR $<0.1$ ). The strongest susceptible class II effect was for the DR3-  
215 DQ2/DR4-DQ8 diplotype, whilst the protective DRB1\*15:01-DQB1\*06:02 and  
216 DRB1\*07:01-DQB1\*03:03 haplotypes showed greater protection from T1D in the  $<7$   
217 group compared to the  $\geq 13$  group. Class I alleles A\*24:02 and B39\*06 showed more  
218 susceptibility to T1D in the  $<7$  compared to and  $\geq 13$  group (Figure 1).

219 Comparison of imputed classical 4 digit HLA alleles with directly genotyped 4 digit  
220 HLA alleles showed concordance of over 91% for each of gene examined  
221 (Supplementary Figure 1).

### 222 **Multinomial logistic regression: non-HLA regions**

223 Outside the HLA, nine regions were differentially-associated between the  $<7$  and  $\geq 13$   
224 group (FDR $<0.1$ ), near Ikaros family zinc finger 3 (*IKZF3*), Cathepsin H (*CTSH*),  
225 GLIS family zinc finger 3 (*GLIS3*), Chymotrypsinogen B1 (*CTRB1*), the third index  
226 variant at interleukin 2 receptor alpha (*IL2RA*), interleukin 10 (*IL10*), Calmodulin-  
227 Regulated Spectrin-Associated Protein 2 (*CAMSAP2*), Signal Regulatory Protein  
228 Gamma (*SIRPG*) and *PTPRK* (Figure 2). Three of these (*IKZF3*, *CTSH* and *GLIS3*)  
229 survived Bonferroni correction ( $p < 0.05/55 = 0.00091$ ). At each locus associated with  
230 FDR $<0.1$ , the 7-13 group had a larger effect size than the  $\geq 13$  group and smaller than  
231 the  $<7$  group. Given the  $\geq 13$  group comprises just 1,721 individuals, it is probable that  
232 with increased sample size and hence statistical power, other T1D risk loci with  
233 sizeable estimated effect size differences between groups might reach statistical  
234 significance with regards to heterogeneity (Supplementary Figure 2). Of the 46  
235 variants not satisfying an FDR $<0.1$ , 20 have the strongest signal in  $<7$ s, weakest in

236  $\geq 13$ s and intermediate in 7s-13s, compared to 8 occurrences in that order expected by  
237 chance ( $p=4.27 \times 10^{-6}$ , binomial test), suggesting the presence of substantial additional  
238 signal in variants that we are not able to declare show evidence individually.

### 239 **Stability of non-HLA results**

240 After sampling half of the cases and controls 100 times, we found that nominal  
241 significance ( $p < 0.05$ ) was observed for the heterogeneity in effect size test between  
242 age-at-diagnosis groups  $> 50\%$  of the time for the *IKZF3*, *CTSH*, *GLIS3*, *CTRB1* and  
243 *IL2RA* (3<sup>rd</sup> index variant) loci (Supplementary Figure 3), and  $> 44\%$  of the time at the  
244 other FDR heterogeneous loci (*IL10*, *CAMSAP2*, *SIRPG* and *PTPRK/THEMIS*).

245 In the UK-specific sensitivity analysis, six of the nine FDR heterogeneous loci from  
246 the primary analysis were heterogeneous between the  $< 7$  and  $\geq 13$  group ( $FDR < 0.1$ ) in  
247 this ancestry-homogeneous population, two of the loci showed no heterogeneity in  
248 effect size (*CTRB1*  $p=0.310$  and *CAMSAP2*  $p=0.578$ ) and were thus removed from  
249 our set of differentially-associated regions and the remaining locus, *IL10*, had a p-  
250 value of 0.06, which we considered differentially associated between the  $< 7$  and  $\geq 13$   
251 groups, given the decrease in statistical power in this sensitivity analysis  
252 (Supplementary Figure 4).

253 When changing the threshold for the early-diagnosed group to  $< 6$  and  $< 5$ , all seven  
254 associated loci from the primary analysis and UK-specific analysis were  
255 heterogeneous ( $FDR < 0.1$ ) (Supplementary Figures 5 and 6).

256 Minor allele frequency plots by age-at-diagnosis for the seven differentially  
257 associated loci that remained heterogeneous between the  $< 7$  and  $\geq 13$  group in all  
258 analyses are shown in Supplementary Figures 7-13, whilst Supplementary Tables 3  
259 and 4 summarise the most likely causal genes at these loci.

### 260 **Fine mapping**

261 We fine mapped the three loci (*IKZF3*, *CTSH* and *GLIS3*) that reached Bonferroni-  
262 corrected heterogeneity between age-at-diagnosis groups. The posterior probability of  
263 there being one causal variant was >0.63 at each locus. All variants contained within a  
264 group that has a group posterior probability of causality of >0.9 are listed in  
265 Supplementary Tables 5-7, though our stringent post-imputation variant quality  
266 control filtering means variants in high LD with the listed variants could also be  
267 causal for T1D but were removed from the current analysis due to low quality  
268 imputation at that variant.

269 The *IKZF3* locus results prioritise an LD block containing 34 variants, all of which  
270 could be causal, which also effects expression of at least three genes ( $p < 5 \times 10^{-150}$ ),  
271 where the minor allele at the most likely causal variants decrease T1D risk and *IKZF3*  
272 expression and also increase expression of *GSDMB* and *ORMDL3*. Colocalisation  
273 analyses support the hypothesis that the disease causal variant and the eQTL causal  
274 variant were the same for all three genes (posterior probability of colocalisation for  
275 T1D and eQTL with *IKZF3*=0.973, *GSDMB*=0.841 and *ORMDL3*=0.846).

276 The *CTSH* locus showed evidence of colocalisation with the *CTSH* whole blood  
277 eQTL (posterior probability of colocalisation=0.655); the susceptibility allele for T1D  
278 is associated with more expression of *CTSH* (Figure 3).

279 There was no evidence of colocalisation between disease risk and *GLIS3* whole blood  
280 eQTL (posterior probability of colocalisation=0.036), suggesting the variant might be  
281 acting elsewhere to alter T1D risk.

## 282 **Discussion**

283 The stratification of patients by age-at-diagnosis according to islet phenotypes has  
284 provided a rich source of genes, molecules and pathways with greater effects in  
285 children diagnosed with T1D under age 7 years. We expected to see strong  
286 differential associations with the HLA class II haplotypes, in particular the strongest  
287 single susceptibility determinant in the genome, the heterozygous diplotype DR3-  
288 DQ2/DR4-DQ8. Previously with smaller sample sizes and without dichotomising  
289 patients into biologically-defined discrete age categories, HLA class I alleles,  
290 A\*24:02 and B\*39:06 have been shown to be associated with younger age-at-  
291 diagnosis<sup>5-8</sup>. Here, we show for the first time that the protective HLA class II  
292 haplotypes DRB1\*15:01-DQB1\*06:02 and DRB1\*07:01-DQB1\*03:03 are less  
293 prevalent amongst individuals diagnosed at <7 years compared with controls and  
294 those diagnosed at ≥13 years. Therefore, the earliest and most aggressive phenotypic  
295 subtype of T1D results primarily from carriage of high risk alleles and haplotypes of  
296 the HLA class II and I genes, which probably act at four levels: (i) altering the T cell  
297 receptor repertoire in favour of anti-islet antigen reactivity, for example preproinsulin,  
298 and/or reducing the protective repertoire of T regulatory cells; (ii) providing a strong  
299 autoantigen presentation environment in the islets and pancreatic draining lymph  
300 nodes enabling the infiltration and cytolytic activity of CD8<sup>+</sup> T cells but also by  
301 disrupting B cell anergy<sup>13</sup> permitting binding and presentation of autoantigen to  
302 provide potent help to T cells in a self-reinforcing spiral of autoreactivity; (iii)  
303 affecting the immune response to the viral infections that are involved in the disease;  
304 (iv) affecting how the gut microbiome develops in early life, a system that is known  
305 to affect T1D susceptibility<sup>14</sup>.

306 In addition to the HLA heterogeneity, we obtained robust evidence of differences in  
307 effect size between the age-at-diagnosis groups at seven non-HLA loci. Of these loci,  
308 one plausible candidate gene, *GLIS3*, most likely perturbs disease risk in the islet beta  
309 cells, given the expression levels in the pancreas, lack of expression in immune cells,  
310 colocalisation with type 2 diabetes risk variants<sup>15</sup> and lack of association with other  
311 autoimmune diseases (<https://genetics.opentargets.org>). This finding supports a  
312 mechanism of beta-cell fragility, for example, susceptibility to apoptosis<sup>16</sup>, in which  
313 increased risk of disease is encoded in the beta cell, not only in the immune system.  
314 The *GLIS3* effect can be mimicked in a mouse model of non-immune diabetes by a  
315 high fat diet, linking obesity as a risk factor in T1D and type 2 diabetes<sup>16,17</sup>. Two of  
316 the loci, *CTSH* and *IKZF3*, could act in the islets or elsewhere, whilst all of the other  
317 candidate causal genes (*IL2RA*, *IL10*, *SIRPG*, *PTPRK/THEMIS*, as well as  
318 *IKZF3/ORMDL3/GSDMB* and *CTSH*) have known functions in T and/or B cell  
319 biology (Supplementary Table 4). This implies that in addition to HLA-susceptibility,  
320 risk of T1D in the very young is also impacted by particular malfunctions in the  
321 infiltrating T and B cells, leading to increased risk of autoreactivity, resulting in a  
322 perfect storm of immune infiltration, antigen recognition and a rapid destruction of  
323 beta cells.

324 Of the three non-HLA risk regions with the strongest evidence of heterogeneity  
325 between age-at-diagnosis groups, we focus on the *IKZF3* and *CTSH* loci, which  
326 colocalise with whole blood eQTLs. The region containing *IKZF3* has a complex  
327 structure with a large LD block, which is associated with multiple diseases, including  
328 asthma and paediatric asthma<sup>18, 19</sup> (Supplementary Table 4). However, the direction  
329 of effect of the risk variant is opposite in asthma to all associated autoimmune  
330 diseases, including T1D, where the C allele at a variant within the haplotype,



331 rs921649 (C>T), increases susceptibility to autoimmunity, whereas the C allele is  
332 protective for asthma<sup>18</sup>. Whole blood eQTL data shows the expression of 13 protein-  
333 coding genes is modulated by variants in the disease-associated haplotype, with  
334 *IKZF3*, *ORMDL3* and *GSDMB* the most affected<sup>12</sup>. All three genes are expressed in  
335 lymphocytes and are up- (*IKZF3*) or down-regulated (*ORMDL3*, *GSDMB*)  
336 (<https://dice-database.org/>) following activation, with good biological candidacy for  
337 altering disease risk. *IKZF3* is a transcriptional repressor with a key role in B-cell  
338 activation and differentiation<sup>20</sup> and T cell differentiation<sup>21</sup>. *ORMDL3* is a central  
339 regulator of sphingolipid biosynthesis<sup>22</sup> and has also been proposed to negatively  
340 regulate store-operated calcium, lymphocyte activation and cytokine production<sup>18,23</sup>,  
341 while *GSDMB* can act as a pyroptotic protein<sup>24</sup>. Therefore one or more of these genes  
342 may be causal for T1D risk. Pertinent to the increased frequency of B-cell infiltration  
343 in the islets of the <7 group, there is evidence that carriers of the T1D risk allele have  
344 decreased anergic high affinity insulin-binding B cells in circulating blood, implying  
345 some of this population may have relocated to the pancreas<sup>13</sup>. This loss of anergic  
346 circulating B cell frequencies is also associated with the most predisposing age-at-  
347 diagnosis diplotype HLA-DRB1\*03:01-DQB1\*02:01/DRB1\*04:01-DQB1\*03:02  
348 compared to donors with the protective HLA class II haplotypes<sup>13</sup>.

349 The candidate T1D risk variants at the *CTSH* locus, for example the C allele at  
350 rs2289702 (C>T), are associated with increased expression of *CTSH* RNA in multiple  
351 cell types and tissues (Supplementary Table 4). The locus has previously been  
352 implicated in T1D aetiology by altering sensitivity of beta cells to apoptosis<sup>25</sup>, where  
353 rs3825932 (C>T) was investigated, which is in low LD ( $r^2=0.26$ ) with the disease-  
354 associated variant reported here and the T1D risk allele counter-intuitively resulted in  
355 protection from beta-cell apoptosis. Thus, beta-cell apoptosis may not be the primary

356 mechanism underlying disease aetiology in this region. *CTSH* functions as an  
357 endopeptidase and can cleave the N-terminus of the Toll-like receptor 3 (TLR3)  
358 protein, increasing its functionality<sup>26</sup>. Given TLR3 is expressed in islets<sup>27</sup>, it is  
359 possible that the increase in *CTSH* expression associated with the T1D susceptibility  
360 allele (the C allele of rs2289702) results in increased TLR3 N-terminus cleavage,  
361 heightened responses to viral infections and increased release of type 1 interferon  
362 (IFN). This may increase baseline risk of T1D and specifically the risk of early-  
363 diagnosed T1D in individuals carrying this allele, since viral infections are more  
364 frequent in childhood. There is mounting evidence that enteroviral infections  
365 predispose to T1D, a type 1 IFN transcriptional signature precedes anti-islet  
366 autoantibody appearance in children<sup>28</sup>, and another receptor for viral RNA, MDA5  
367 encoded by *IFIH1* is a proven T1D susceptibility gene with its higher IFN-inducing  
368 activity increasing risk of the disease<sup>29</sup>. Exposure of beta cells to type 1 IFN greatly  
369 increases their HLA class I expression and susceptibility to CD8<sup>+</sup> cytotoxic killing,  
370 and heightened class I expression on beta cells is a hallmark phenotype of the T1D  
371 pancreas<sup>30</sup>.

372 Our genetic results imply a dynamic, fully integrated pathogenic collaboration  
373 between the immune system, the beta cells and viral infection in the initiation and  
374 rapid development of extreme insulin-deficiency starting in the first few weeks and  
375 months of life in those that carry the heaviest load of age-at-diagnosis alleles.

376 Combinations of modulators of these pathways could be an effective way of  
377 preventing the cessation of endogenous insulin-production.

## 378 **Tables and Figures**

379 **Table 1:** Characteristics of individuals included in the analysis.

|                       | <b>Controls</b> | <b>&lt;7</b> | <b>7-13</b>  | <b>&gt;13</b> |
|-----------------------|-----------------|--------------|--------------|---------------|
| N                     | 18400           | 3111         | 3759         | 1721          |
| Mean age-at-diagnosis | -               | 3.67         | 9.54         | 18.31         |
| Sex: Female           | 9712 (52.8%)    | 1495 (48.8%) | 1917 (52%)   | 638 (43%)     |
| Asia-Pacific          | 858 (4.7%)      | 22 (0.7%)    | 24 (0.6%)    | 34 (2%)       |
| Central Europe        | 1680 (9.1%)     | 50 (1.6%)    | 62 (1.6%)    | 172 (10%)     |
| Finland               | 2819 (15.3%)    | 100 (3.2%)   | 154 (4.1%)   | 438 (25.5%)   |
| Northern Ireland      | 478 (2.6%)      | 222 (7.1%)   | 248 (6.6%)   | 35 (2%)       |
| UK                    | 10586 (57.5%)   | 2666 (85.7%) | 3209 (85.4%) | 922 (53.6%)   |
| USA                   | 1979 (10.8%)    | 51 (1.6%)    | 62 (1.6%)    | 120 (7%)      |

380

381 **Figure 1:** Classical HLA alleles association with type 1 diabetes diagnosed at <7  
382 years old (red circle; mean log-odds ratio age-at-diagnosis +/- 95%CI), 7-13 years old  
383 (green circle; mean log-odds ratio age-at-diagnosis 7-13+/- 95%CI) and  $\geq 13$  years old  
384 (blue circle mean log-odds ratio age-at-diagnosis  $>13$ +/- 95%CI), from a multinomial  
385 logistic regression. Left panel shows the log-odds ratios with a dashed red line  
386 showing a log-odds ratio of 0. The right panel shows the association statistics from a  
387 likelihood ratio test comparing a multinomial logistic regression constraining the log-  
388 odds ratios from the <7 and  $\geq 13$  groups to be equal compared to an unconstrained  
389 model. Red dotted line shows nominal significance in heterogeneity ( $p < 0.05$ ), red  
390 dashed line show Bonferroni-corrected significance in heterogeneity.

391

392 **Figure 2:** Non-HLA type 1 diabetes associated variants, showing log-odds ratios for  
393 those diagnosed at <7 years old (red circle; mean log-odds ratio age-at-diagnosis +/-  
394 95%CI), 7-13 years old (green circle; mean log-odds ratio age-at-diagnosis 7-13+/-  
395 95%CI) and  $\geq 13$  years old (blue circle mean log-odds ratio age-at-diagnosis  $\geq 13$ +/-  
396 95%CI), from a multinomial logistic regression. Left panel shows the log-odds ratios  
397 with a dashed red line showing a log-odds ratio of 0. The right panel shows the  
398 association statistics from a likelihood ratio test comparing a multinomial logistic  
399 regression constraining the log-odds ratios from the <7 and  $\geq 13$  groups to be equal  
400 compared to an unconstrained model. Showing only loci with a false discovery rate of  
401 less than 0.1. Red dotted line shows threshold for false discovery rate of  $< 0.1$ , red  
402 dashed line shows threshold for Bonferroni-corrected heterogeneity.

403

404 **Figure 3:** Results from fine mapping the *IKZF3* and *CTSH* loci regions. Analysis  
405 includes individuals from the UK and Northern Ireland only and only controls and

406 cases diagnosed at <7 years. Top panel: Gene positions (genome build 37), with  
407 arrows indicating direction of transcription. Second panel, univariable early-  
408 diagnosed (<7) type 1 diabetes log-odds ratios and 95% confidence intervals for each  
409 of the most likely causally associated variants as prioritised by GUESSFM. Third  
410 panel:  $\log_e(\text{absolute eQTL z score})$  if z score>0 and  $-\log_e(\text{absolute eQTL z score})$  if z  
411 score<0, so direction of effect can be compared, from publically available whole  
412 blood eQTL dataset of over 30,000 individuals, including only eQTLs with a p value  
413 of  $<5 \times 10^{-150}$  (*IKZF3* locus) and  $<5 \times 10^{-50}$  (*CTSH* locus). The symbols are coloured red  
414 if contained in the set of most likely causal variants, as produced by GUESSFM and  
415 the shape corresponds to the gene that the variant is effecting transcription of.

416

417 **Supplementary Figure 1:** Concordance of HiBag imputed versus directly genotyped  
418 classical HLA alleles. Concordance is defined as identical 4 digit HLA classical allele  
419 at both chromosomes.

420

421 **Supplementary Figure 2:** All 55 non-HLA type 1 diabetes associated variants,  
422 showing log-odds ratios for those diagnosed at <7 years old (red circle; mean log-  
423 odds ratio age-at-diagnosis +/- 95%CI), 7-13 years old (green circle; mean log-odds  
424 ratio age-at-diagnosis 7-13 +/- 95%CI) and  $\geq 13$  years old (blue circle mean log-odds  
425 ratio age-at-diagnosis  $\geq 13$  +/- 95%CI), from a multinomial logistic regression. Left  
426 panel shows the log-odds ratios with a dashed red line showing a log-odds ratio of 0.  
427 The right panel shows the association statistics from a likelihood ratio test comparing  
428 a multinomial logistic regression constraining the log-odds ratios from the <7 and  $\geq 13$   
429 groups to be equal compared to an unconstrained model. Red dotted line shows  
430 threshold for nominally significant heterogeneity between groups ( $p < 0.05$ ), red solid

431 line shows threshold for false discovery rate of  $<0.1$ , red dashed line shows threshold  
432 for Bonferroni-corrected significant heterogeneity.

433

434 **Supplementary Figure 3:** Proportion of times each locus had a nominally significant  
435 heterogeneity test ( $p < 0.05$ ) when sampling 50% of the entire collection 100 times,  
436 generating 200 analysis datasets.

437

438 **Supplementary Figure 4:** All 55 non-HLA type 1 diabetes associated variants  
439 examined using only individuals from the UK or Northern Ireland, showing log-odds  
440 ratios for those diagnosed at  $<7$  years old (red circle; mean log-odds ratio age-at-  
441 diagnosis  $\pm$  95%CI), 7-13 years old (green circle; mean log-odds ratio age-at-  
442 diagnosis 7-13  $\pm$  95%CI) and  $\geq 13$  years old (blue circle mean log-odds ratio age-at-  
443 diagnosis  $>13 \pm$  95%CI), from a multinomial logistic regression. Left panel shows  
444 the log-odds ratios with a dashed red line showing a log-odds ratio of 0. The right  
445 panel shows the association statistics from a likelihood ratio test comparing a  
446 multinomial logistic regression constraining the log-odds ratios from the  $<7$  and  $\geq 13$   
447 groups to be equal compared to an unconstrained model. Red dotted line shows  
448 threshold for nominally significant heterogeneity between groups ( $p < 0.05$ ), red solid  
449 line shows threshold for false discovery rate of  $<0.1$ , red dashed line shows threshold  
450 for Bonferroni-corrected significant heterogeneity.

451

452 **Supplementary Figure 5:** All 55 non-HLA type 1 diabetes associated variants,  
453 showing log-odds ratios for those diagnosed at  $<6$  years old (red circle; mean log-  
454 odds ratio age-at-diagnosis  $\pm$  95%CI), 6-13 years old (green circle; mean log-odds  
455 ratio age-at-diagnosis 6-13  $\pm$  95%CI) and  $\geq 13$  years old (blue circle mean log-odds

456 ratio age-at-diagnosis  $\geq 13$  +/- 95%CI) from a multinomial logistic regression. Left  
457 panel shows the log-odds ratios with a dashed red line showing a log-odds ratio of 0.  
458 The right panel shows the association statistics from a likelihood ratio test comparing  
459 a multinomial logistic regression constraining the log-odds ratios from the  $< 6$  and  $\geq 13$   
460 groups to be equal compared to an unconstrained model. Red dotted line shows  
461 threshold for nominally significant heterogeneity between groups ( $p < 0.05$ ), red solid  
462 line shows threshold for false discovery rate of  $< 0.1$ , red dashed line shows threshold  
463 for Bonferroni-corrected significant heterogeneity.

464

465 **Supplementary Figure 6:** All 55 non-HLA type 1 diabetes associated variants,  
466 showing log-odds ratios for those diagnosed at  $< 5$  years old (red circle; mean log-  
467 odds ratio age-at-diagnosis +/- 95%CI), 5-13 years old (green circle; mean log-odds  
468 ratio age-at-diagnosis 5-13 +/- 95%CI) and  $\geq 13$  years old (blue circle mean log-odds  
469 ratio age-at-diagnosis  $\geq 13$  +/- 95%CI) from a multinomial logistic regression. Left  
470 panel shows the log-odds ratios with a dashed red line showing a log-odds ratio of 0.  
471 The right panel shows the association statistics from a likelihood ratio test comparing  
472 a multinomial logistic regression constraining the log-odds ratios from the  $< 7$  and  $\geq 13$   
473 groups to be equal compared to an unconstrained model. Red dotted line shows  
474 threshold for nominally significant heterogeneity between groups ( $p < 0.05$ ), red solid  
475 line shows threshold for false discovery rate of  $< 0.1$ , red dashed line shows threshold  
476 for Bonferroni-corrected significant heterogeneity.

477

478 **Supplementary Figure 7:** Minor allele frequency of the index variant near the *IKZF3*  
479 gene for controls and individuals diagnosed at various ages.

480

481 **Supplementary Figure 8:** Minor allele frequency of the index variant near the *CTSH*

482 gene for controls and individuals diagnosed at various ages.

483

484 **Supplementary Figure 9:** Minor allele frequency of the index variant near the *GLIS3*

485 gene for controls and individuals diagnosed at various ages.

486

487 **Supplementary Figure 10:** Minor allele frequency of the index variant near the

488 *IL2RA* gene (third index variant) for controls and individuals diagnosed at various

489 ages.

490

491 **Supplementary Figure 11:** Minor allele frequency of the index variant near the *IL10*

492 gene for controls and individuals diagnosed at various ages.

493

494 **Supplementary Figure 12:** Minor allele frequency of the index variant near the

495 *SIRPG* gene for controls and individuals diagnosed at various ages.

496

497 **Supplementary Figure 13:** Minor allele frequency of the index variant near the

498 *PTPRK/THEMIS* genes for controls and individuals diagnosed at various ages.

499

500 **Supplementary Table 1:** Classical HLA alleles/haplotypes examined in analysis.

501

502 **Supplementary Table 2:** Non-HLA variants examined in analysis.

503



504 **Supplementary Table 3:** Non-HLA region variants with evidence of heterogeneity in  
505 effect size between the  $<7$  and  $\geq 13$  groups: Promoter Capture Hi-C (PCHi-C)  
506 candidate genes.

507

508 **Supplementary Table 4:** Details of non-HLA variants with evidence of  
509 heterogeneity in effect size between the  $<7$  and  $\geq 13$  groups.

510

511 **Supplementary Table 5:** Most likely variants causally associated with T1D at the  
512 *IKZF3* locus from GUESSFM fine mapping analysis.

513

514 **Supplementary Table 6:** Most likely variants causally associated with T1D at the  
515 *CTSH* locus from GUESSFM fine mapping analysis.

516

517 **Supplementary Table 7:** Most likely variants causally associated with T1D at the  
518 *GLIS3* locus from GUESSFM fine mapping analysis.

- 519 1. Raab, J. *et al.* Capillary blood islet autoantibody screening for identifying pre-  
520 type 1 diabetes in the general population: design and initial results of the Fr1da  
521 study. *BMJ Open* **6**, e011144 (2016).
- 522 2. Kuhlreiber, W. M. *et al.* Low levels of C-peptide have clinical significance for  
523 established Type 1 diabetes. *Diabet. Med.* **32**, 1346–1353 (2015).
- 524 3. Rawshani, A. *et al.* Excess mortality and cardiovascular disease in young  
525 adults with type 1 diabetes in relation to age at onset: a nationwide, register-  
526 based cohort study. *Lancet* **392**, 477–486 (2018).
- 527 4. Leete, P. *et al.* Differential insulinitic profiles determine the extent of  $\beta$ -cell  
528 destruction and the age at onset of type 1 diabetes. *Diabetes* **65**, 1362–1369  
529 (2016).
- 530 5. Howson, J. M. M. *et al.* Evidence of gene-gene interaction and age-at-  
531 diagnosis effects in type 1 diabetes. *Diabetes* **61**, 3012–3017 (2012).
- 532 6. Valdes, A. M. *et al.* Use of class I and class II HLA loci for predicting age at  
533 onset of type 1 diabetes in multiple populations. *Diabetologia* **55**, 2394–2401  
534 (2012).
- 535 7. Nejentsev, S. *et al.* Localization of type 1 diabetes susceptibility to the MHC  
536 class I genes HLA-B and HLA-A. *Nature* **450**, 887–892 (2007).
- 537 8. Howson, J. M. M., Walker, N. M., Clayton, D. & Todd, J. A. Confirmation of  
538 HLA class II independent type 1 diabetes associations in the major  
539 histocompatibility complex including HLA-B and HLA-A. *Diabetes, Obes.*  
540 *Metab.* **11**, 31–45 (2009).
- 541 9. Inshaw, J. R. J., Walker, N. M., Wallace, C., Bottolo, L. & Todd, J. A. The  
542 chromosome 6q22.33 region is associated with age at diagnosis of type 1  
543 diabetes and disease risk in those diagnosed under 5 years of age. *Diabetologia*

- 544           **61**, 147–157 (2018).
- 545    10.   Noble, J. A. & Valdes, A. M. Genetics of the HLA Region in the Prediction of  
546           Type 1 Diabetes. *Curr. Diab. Rep.* **11**, 533–542 (2011).
- 547    11.   Wallace, C. *et al.* Dissection of a Complex Disease Susceptibility Region  
548           Using a Bayesian Stochastic Search Approach to Fine Mapping. *PLOS Genet.*  
549           **11**, e1005272 (2015).
- 550    12.   Võsa, U. *et al.* Unraveling the polygenic architecture of complex traits using  
551           blood eQTL meta- analysis. *bioRxiv* 1–57 (2018).
- 552    13.   Smith, M. J. *et al.* Loss of B-Cell Anergy in Type 1 Diabetes Is Associated  
553           With High-Risk HLA and Non-HLA Disease Susceptibility Alleles. *Diabetes*  
554           **67**, 697–703 (2018).
- 555    14.   Paun, A. *et al.* Association of HLA-dependent islet autoimmunity with  
556           systemic antibody responses to intestinal commensal bacteria in children. *Sci.*  
557           *Immunol.* **4**, eaau8125 (2019).
- 558    15.   Aylward, A., Chiou, J., Okino, M., Kadakia, N. & Gaulton, K. J. Shared  
559           genetic contribution to type 1 and type 2 diabetes risk. *BioRxiv* (2018).
- 560    16.   Dooley, J. *et al.* Genetic predisposition for beta cell fragility underlies type 1  
561           and type 2 diabetes. *Nat. Genet.* **48**, 519–527 (2016).
- 562    17.   Nogueira, T. C. *et al.* GLIS3, a Susceptibility Gene for Type 1 and Type 2  
563           Diabetes , Modulates Pancreatic Beta Cell Apoptosis via Regulation of a Splice  
564           Variant of the BH3-Only Protein Bim. *PLoS Genet.* **9**, e1003532 (2013).
- 565    18.   Schmiedel, B. J. *et al.* 17q21 asthma-risk variants switch CTCF binding and  
566           regulate IL-2 production by T cells. *Nat. Commun.* **7**, (2016).
- 567    19.   Bouzigon, E. *et al.* Effect of 17q21 Variants and Smoking Exposure in Early-  
568           Onset Asthma. *N. Engl. J. Med.* **359**, 1985–1994 (2019).

- 569 20. Wang, J. *et al.* Aiolos Regulates B Cell Activation and Maturation to Effector  
570 State. *Immunity* **9**, 543–553 (1998).
- 571 21. Quintana, F. J. *et al.* Aiolos promotes TH17 differentiation by directly  
572 silencing Il2 expression. *Nat. Immunol.* **13**, 770–777 (2012).
- 573 22. Davis, D., Kannan, M. & Wattenberg, B. Orm / ORMDL proteins: Gate  
574 guardians and master regulators. *Adv. Biol. Regul.* **70**, 3–18 (2018).
- 575 23. Carreras-Sureda, A. *et al.* ORMDL3 modulates store-operated calcium entry  
576 and lymphocyte activation. *Hum. Mol. Genet.* **22**, 519–530 (2013).
- 577 24. Panganiban, R. A. *et al.* A functional splice variant associated with decreased  
578 asthma risk abolishes the ability of gasdermin B to induce epithelial cell  
579 pyroptosis. *J. Allergy Clin. Immunol.* **142**, 1469–1478 (2018).
- 580 25. Fløyel, T., Brorsson, C., Nielsen, L. B., Miani, M. & Bang-berthelsen, C. H.  
581 CTSH regulates  $\beta$ -cell function and disease progression in newly diagnosed  
582 type 1 diabetes patients. *PNAS* **111**, 10305–10310 (2014).
- 583 26. Qi, R., Singh, D. & Kao, C. C. Proteolytic Processing Regulates Toll-like  
584 Receptor 3 Stability and Endosomal Localization. *J. Biol. Chem.* **287**, 32617–  
585 32629 (2012).
- 586 27. Rasschaert, J. *et al.* Toll-like Receptor 3 and STAT-1 Contribute to Double-  
587 stranded RNA+ Interferon-gamma-induced Apoptosis in Primary Pancreatic  
588 beta-Cells. *J. Biol. Chem.* **280**, 33984–33991 (2005).
- 589 28. Ferreira, R. C. *et al.* A Type 1 Interferon Transcriptional Signature Precedes  
590 Autoimmunity in Children Genetically at Risk for Type 1 Diabetes. *Diabetes*  
591 **63**, 2538–2550 (2014).
- 592 29. Helicase, A. I. *et al.* An Interferon-Induced Helicase (IFIH1) Gene  
593 Polymorphism Associates With Different Rates of Progression From

- 594            Autoimmunity to Type 1 Diabetes. *Diabetes* **60**, 685–690 (2011).
- 595    30.    Richardson, S. J. *et al.* Islet cell hyperexpression of HLA class I antigens: a
- 596            defining feature in type 1 diabetes. *Diabetologia* **59**, 2448–2458 (2016).
- 597

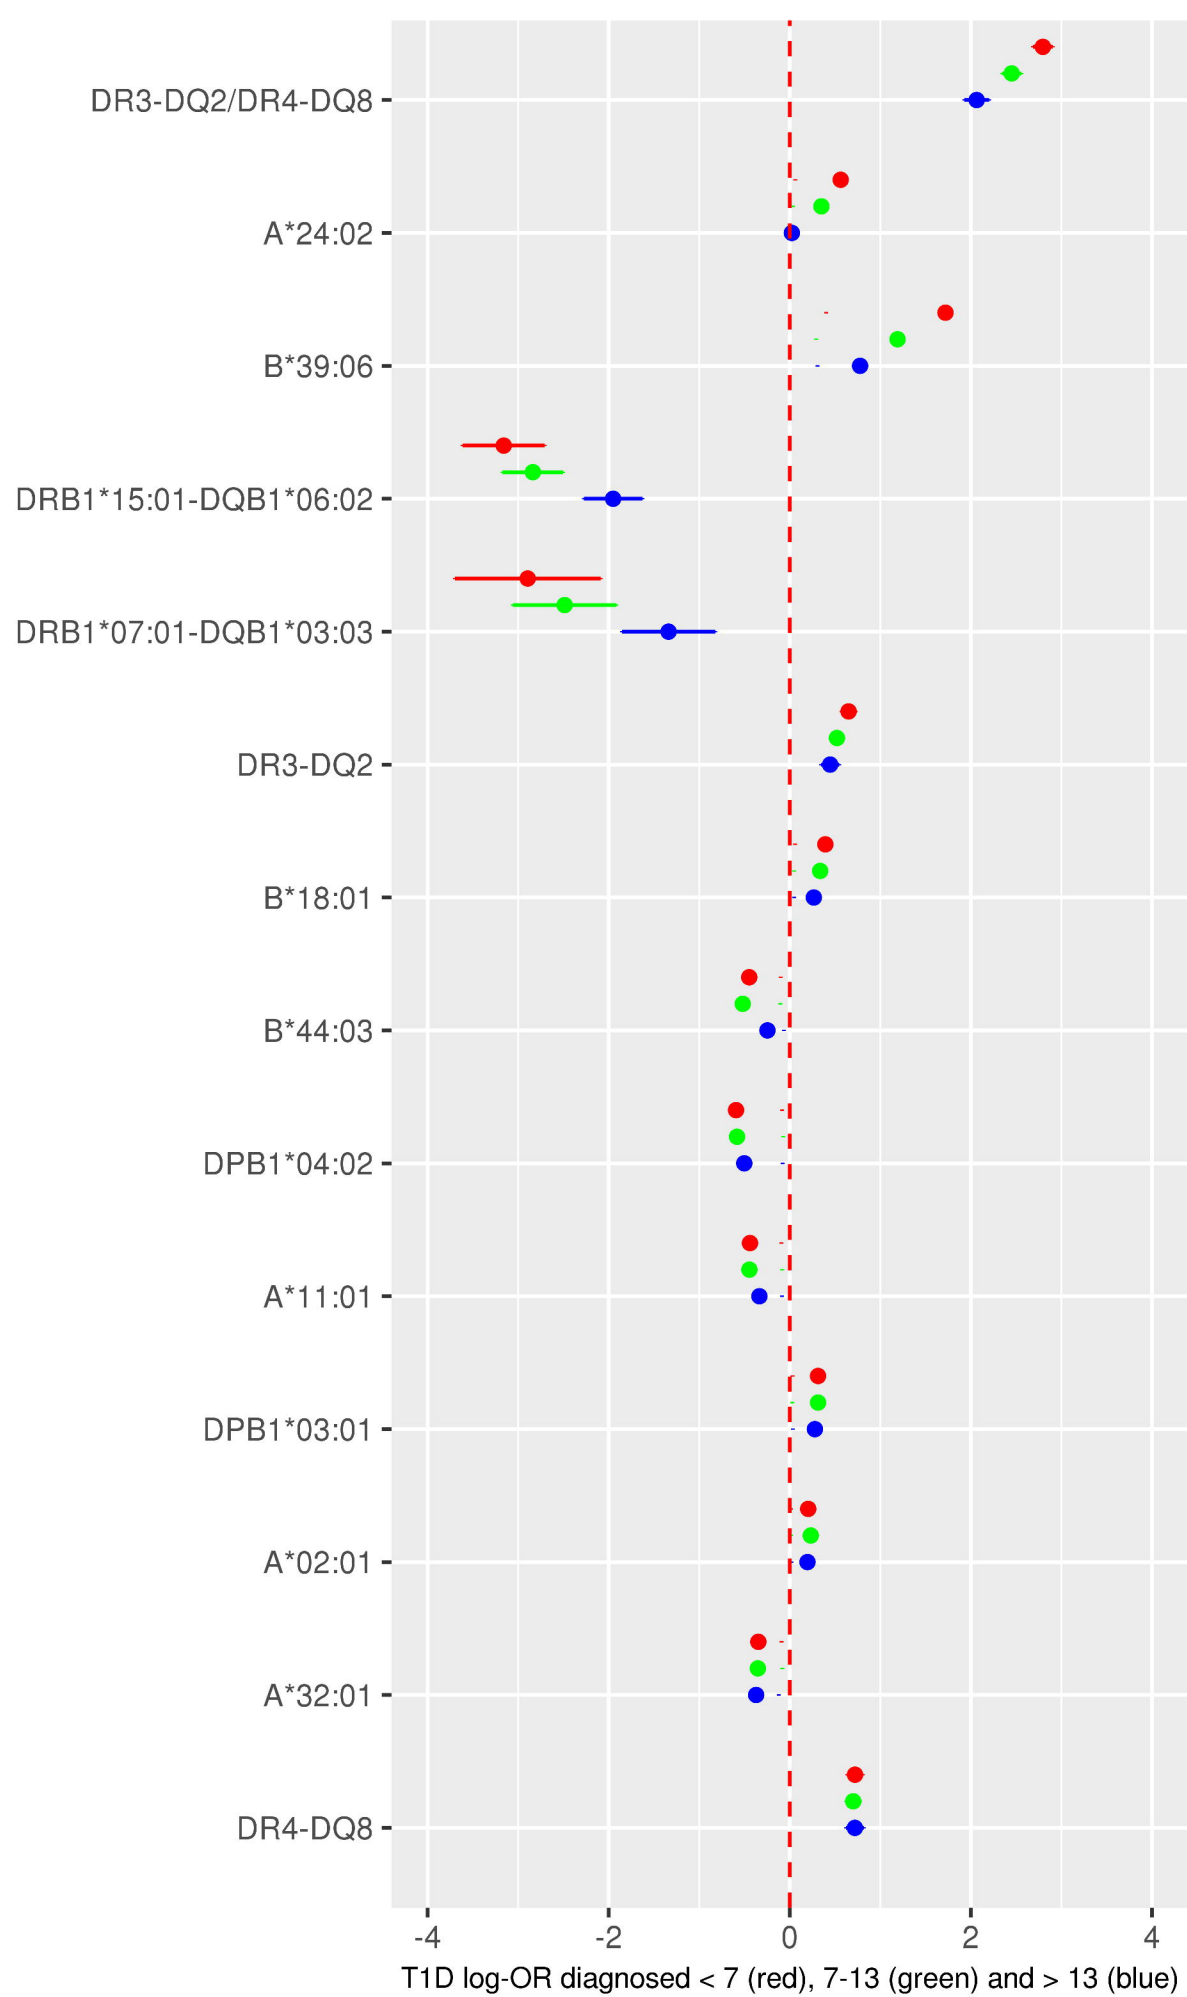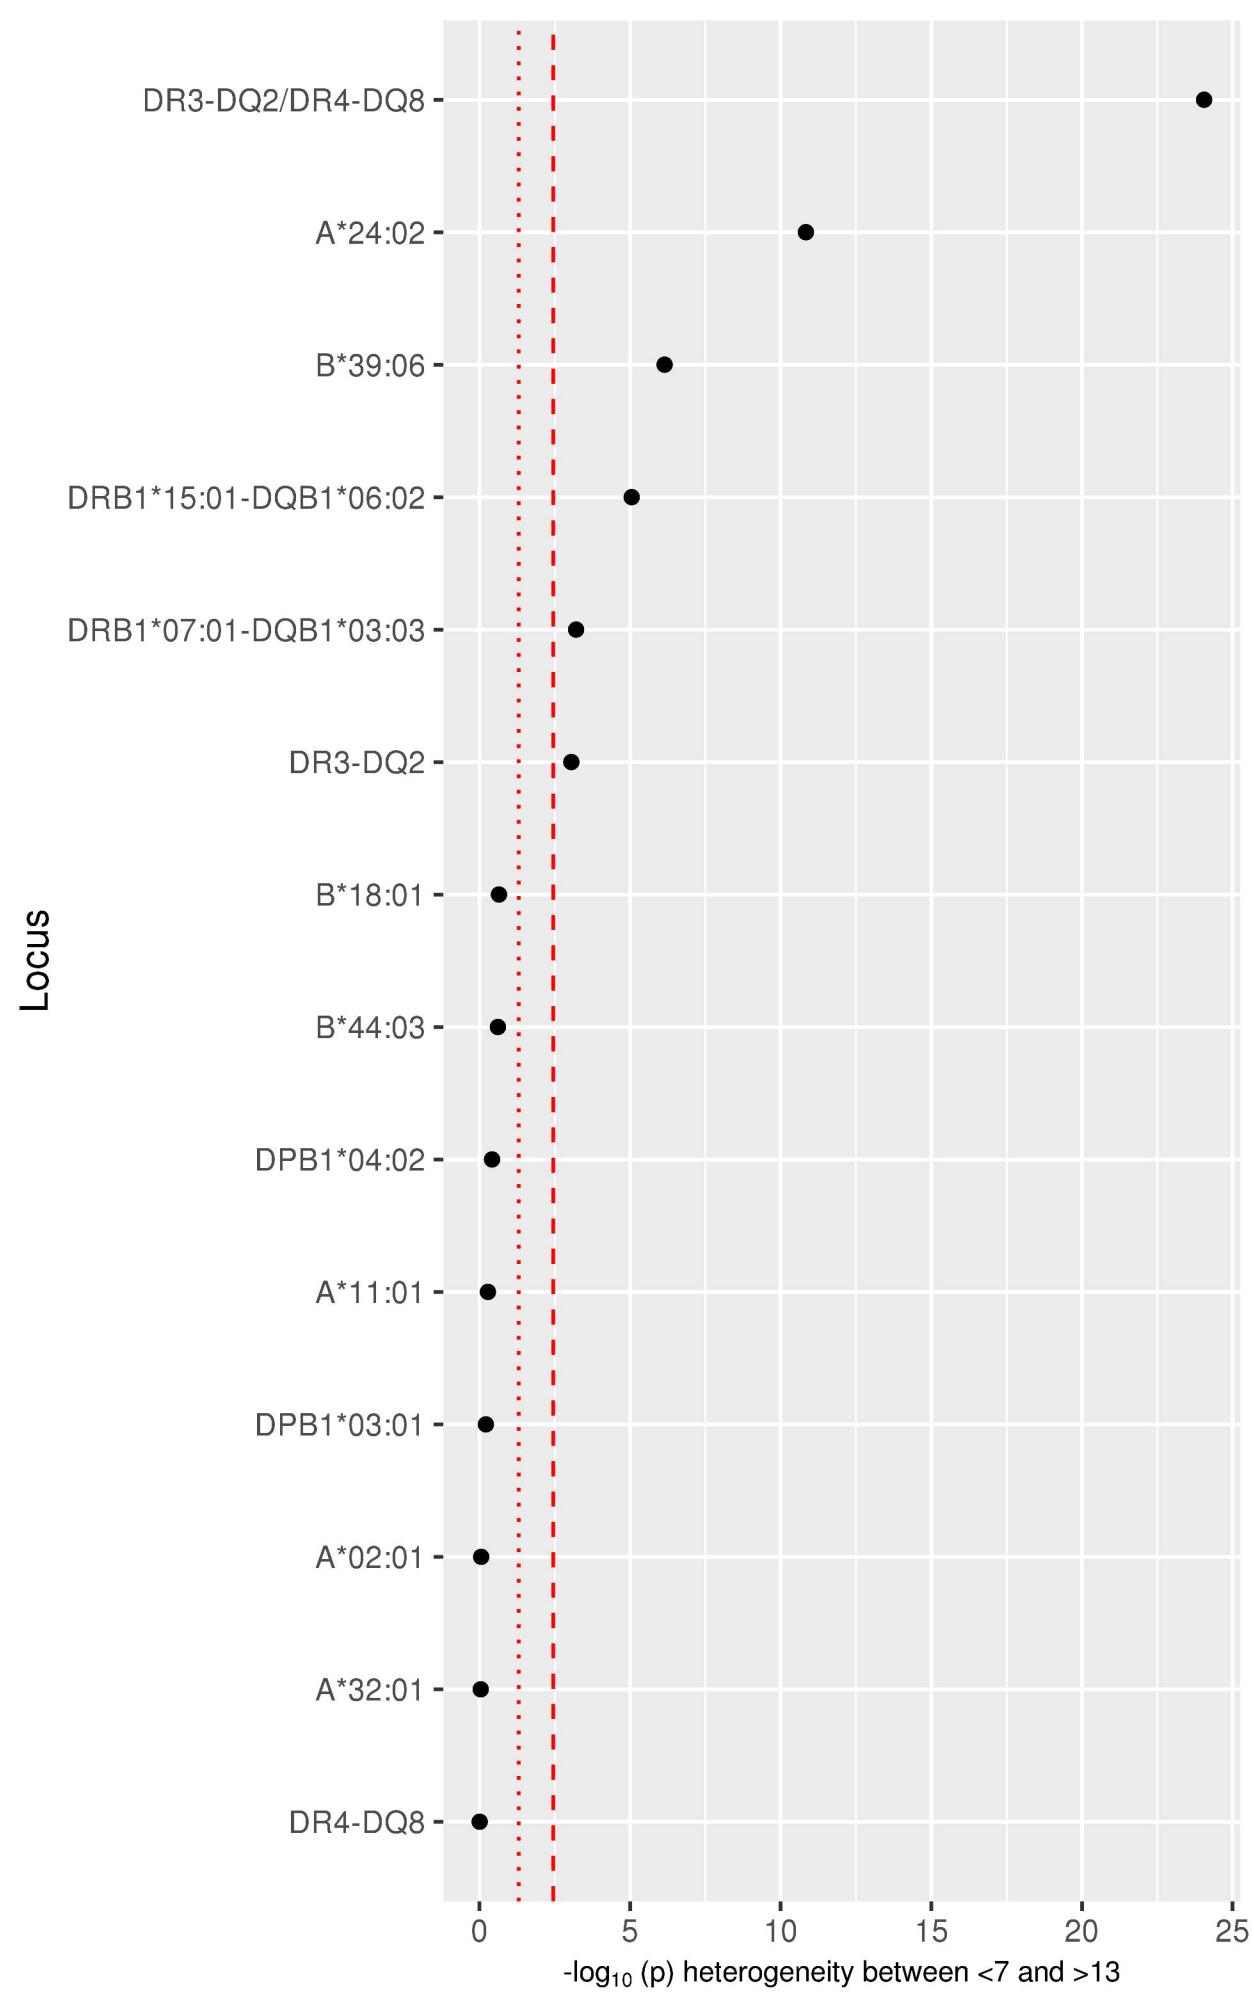

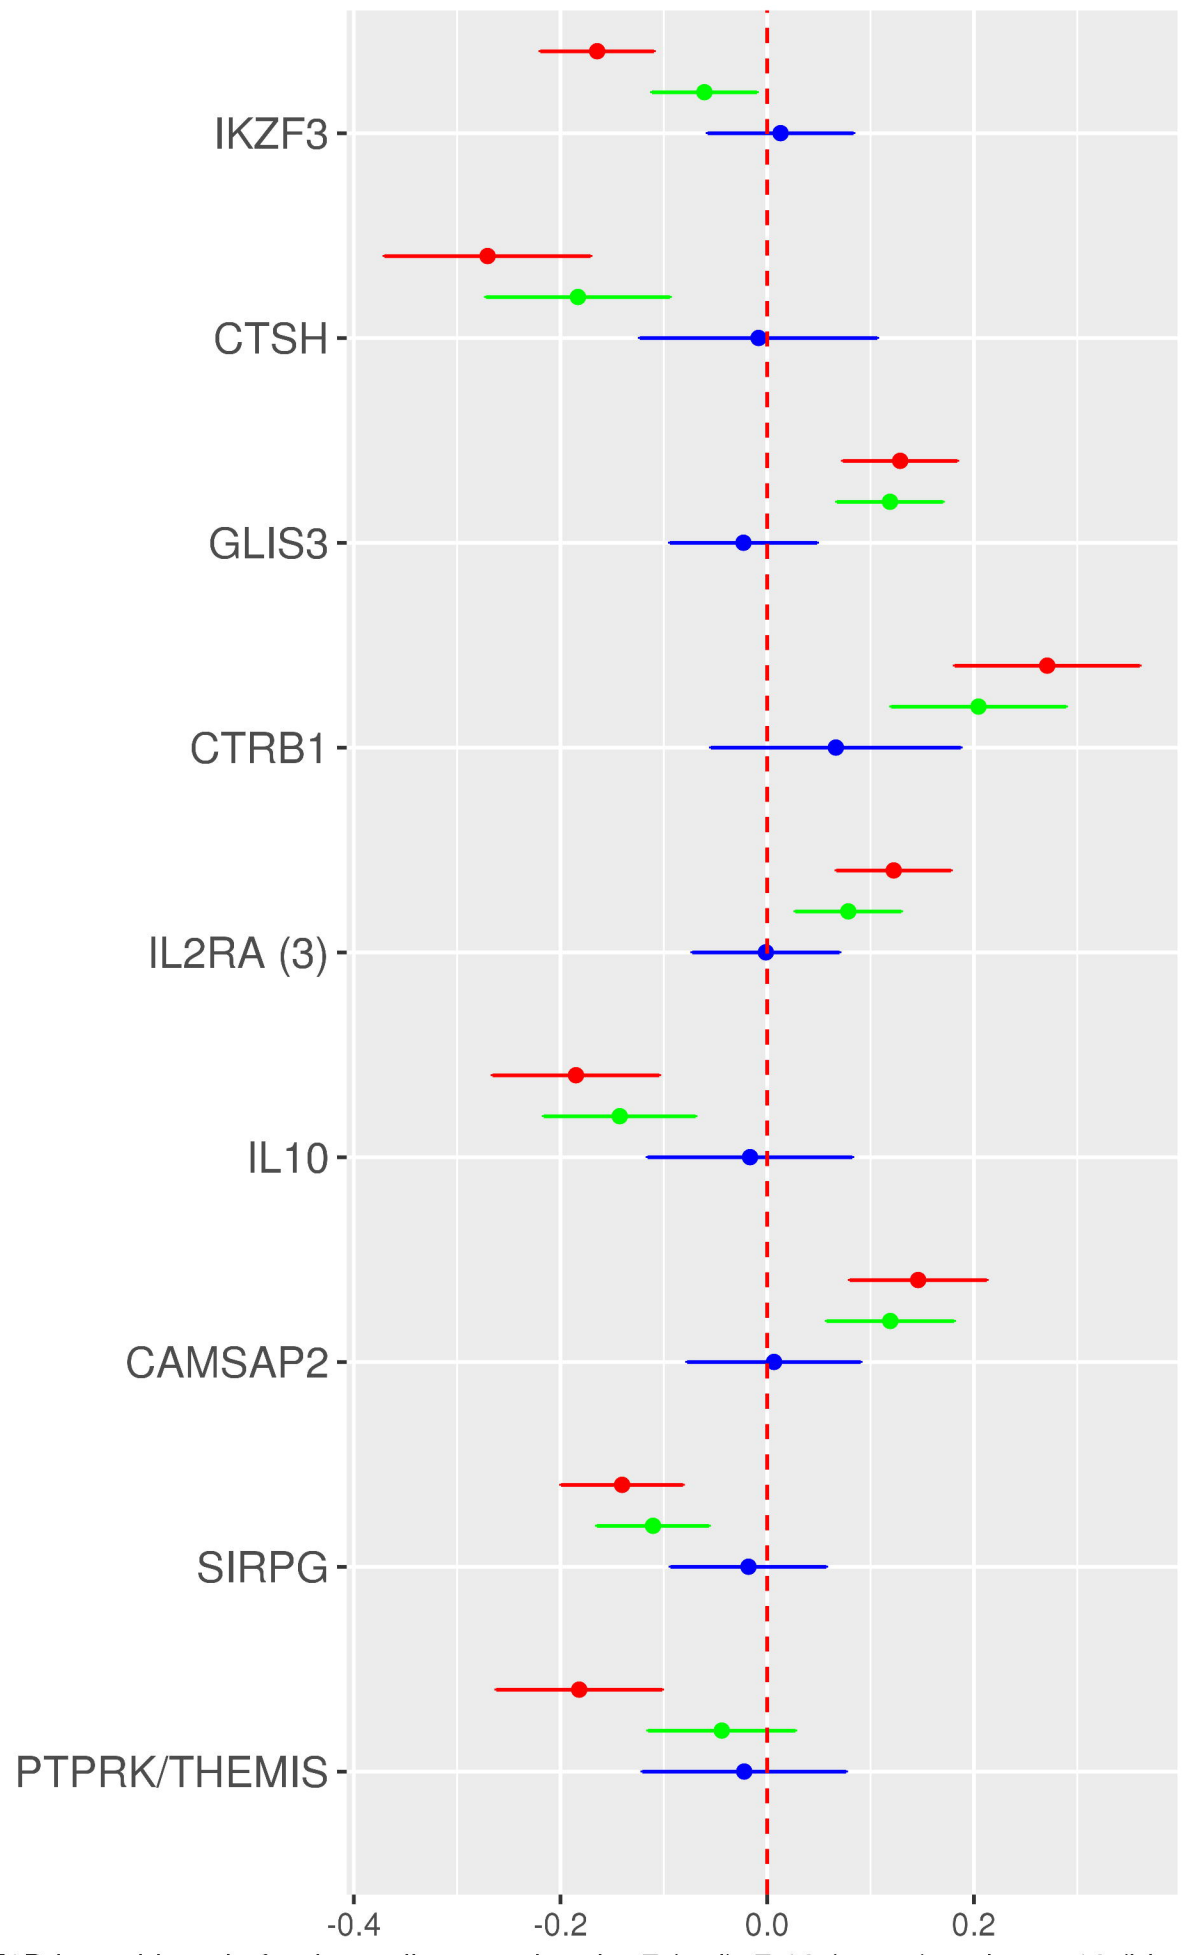

T1D log-odds ratio for those diagnosed under 7 (red), 7-13 (green) and over 13 (blue)

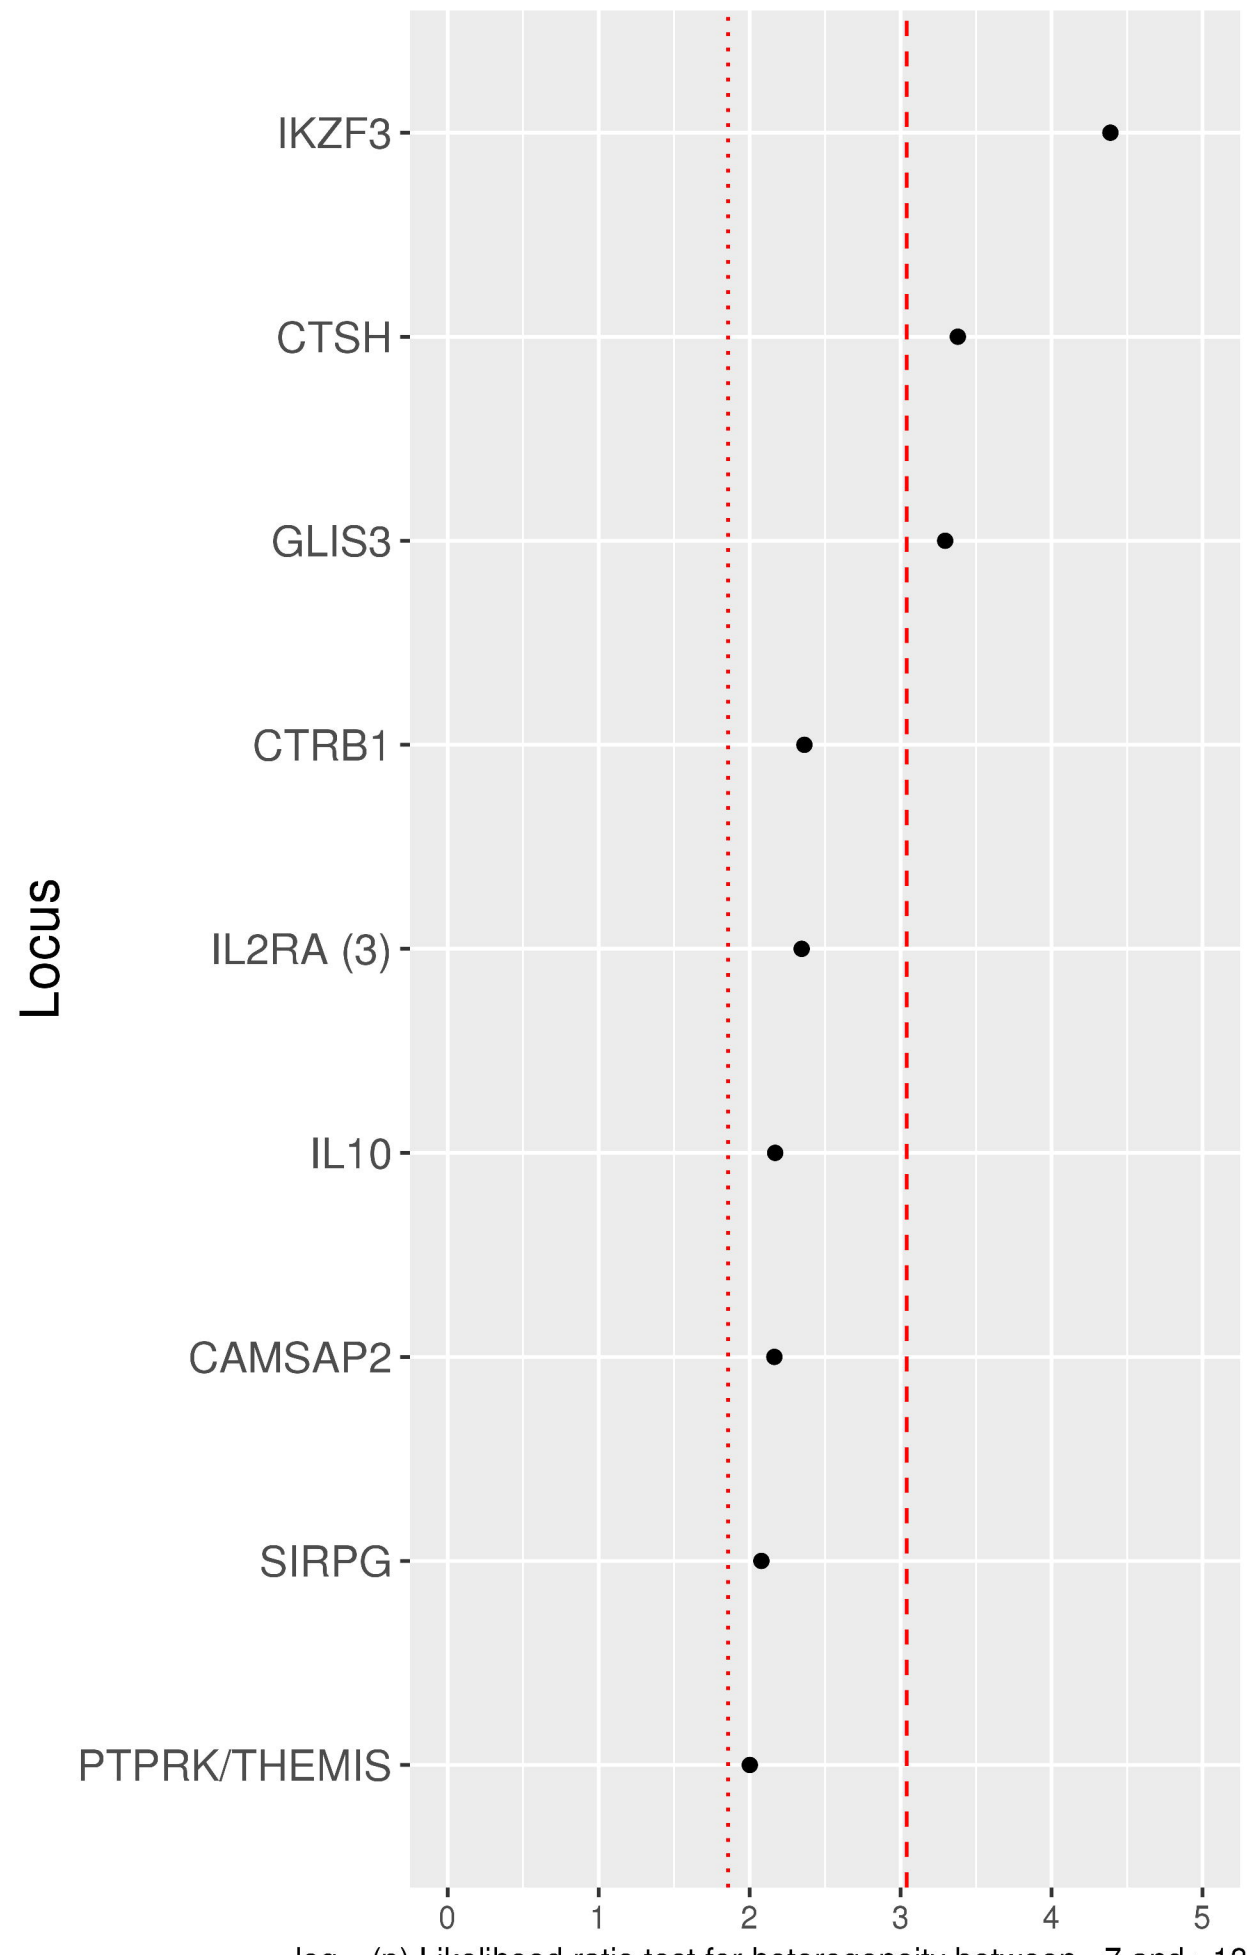

$-\log_{10}(p)$  Likelihood ratio test for heterogeneity between <7 and >13

bioRxiv preprint doi: <https://doi.org/10.1101/577304>; this version posted March 14, 2019. The copyright holder for this preprint (which was not certified by peer review) is the author/funder. All rights reserved. No reuse allowed without permission.

log-odds ratio (<7)

Whole blood eQTL log z-score

Position along chromosome 17

Gene name  
GSDMB  
IKZF3  
ORMDL3

Tag group  
rs8067378.G

Gene  
GSDMA  
GSDMB  
IKZF3  
ORMDL3  
PGAP3

Tag group  
rs8067378.G  
nogroup

log-odds ratio (<7)

Whole blood eQTL log z-score

Position along chromosome 15

Gene name  
CTSH

Tag group  
rs2289702.T

Tag group  
rs2289702.T  
nogroup

Gene  
CTSH  
IREB2

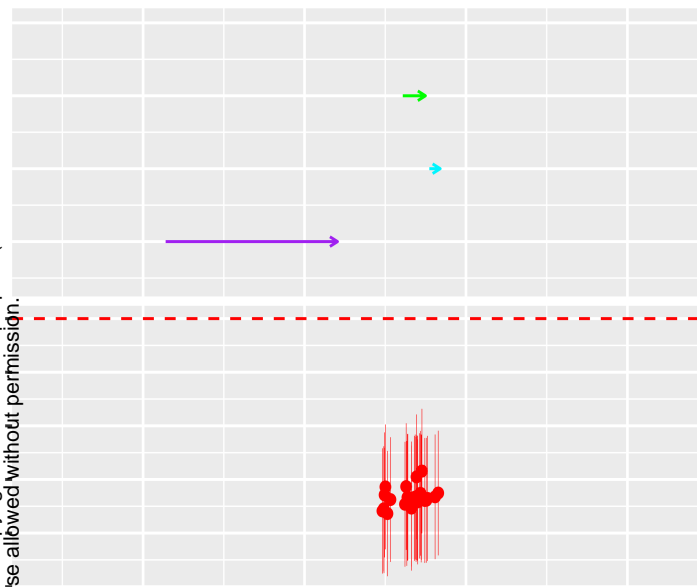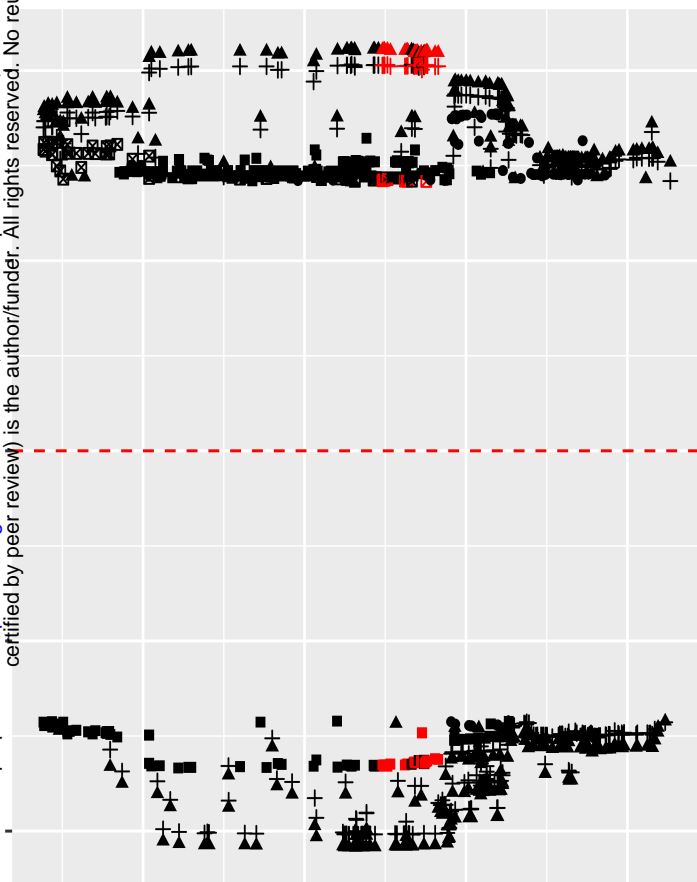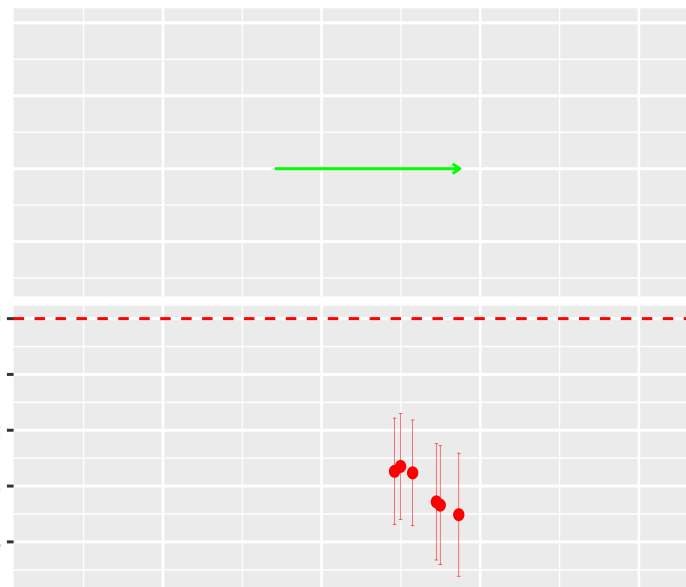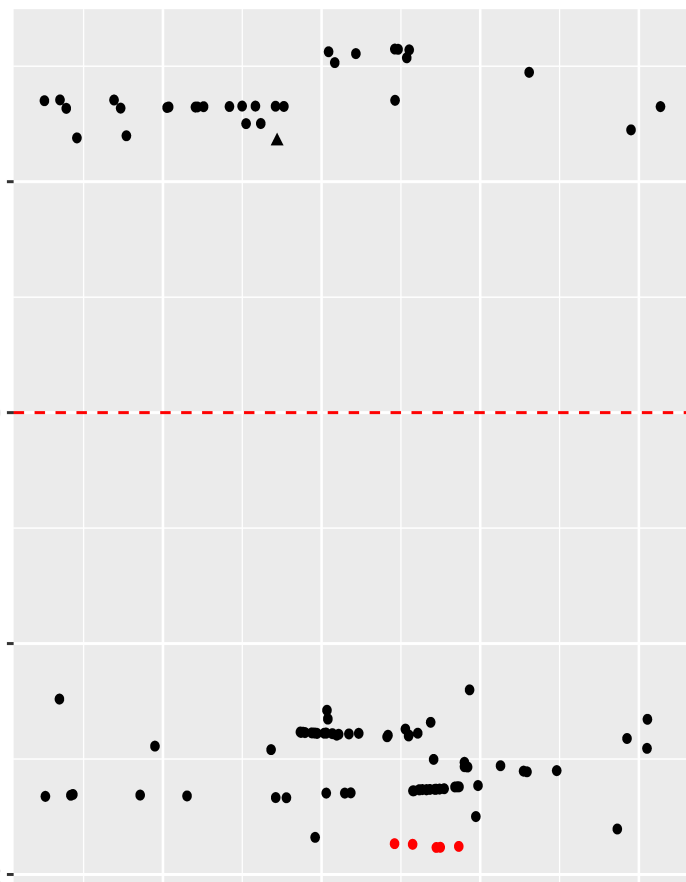



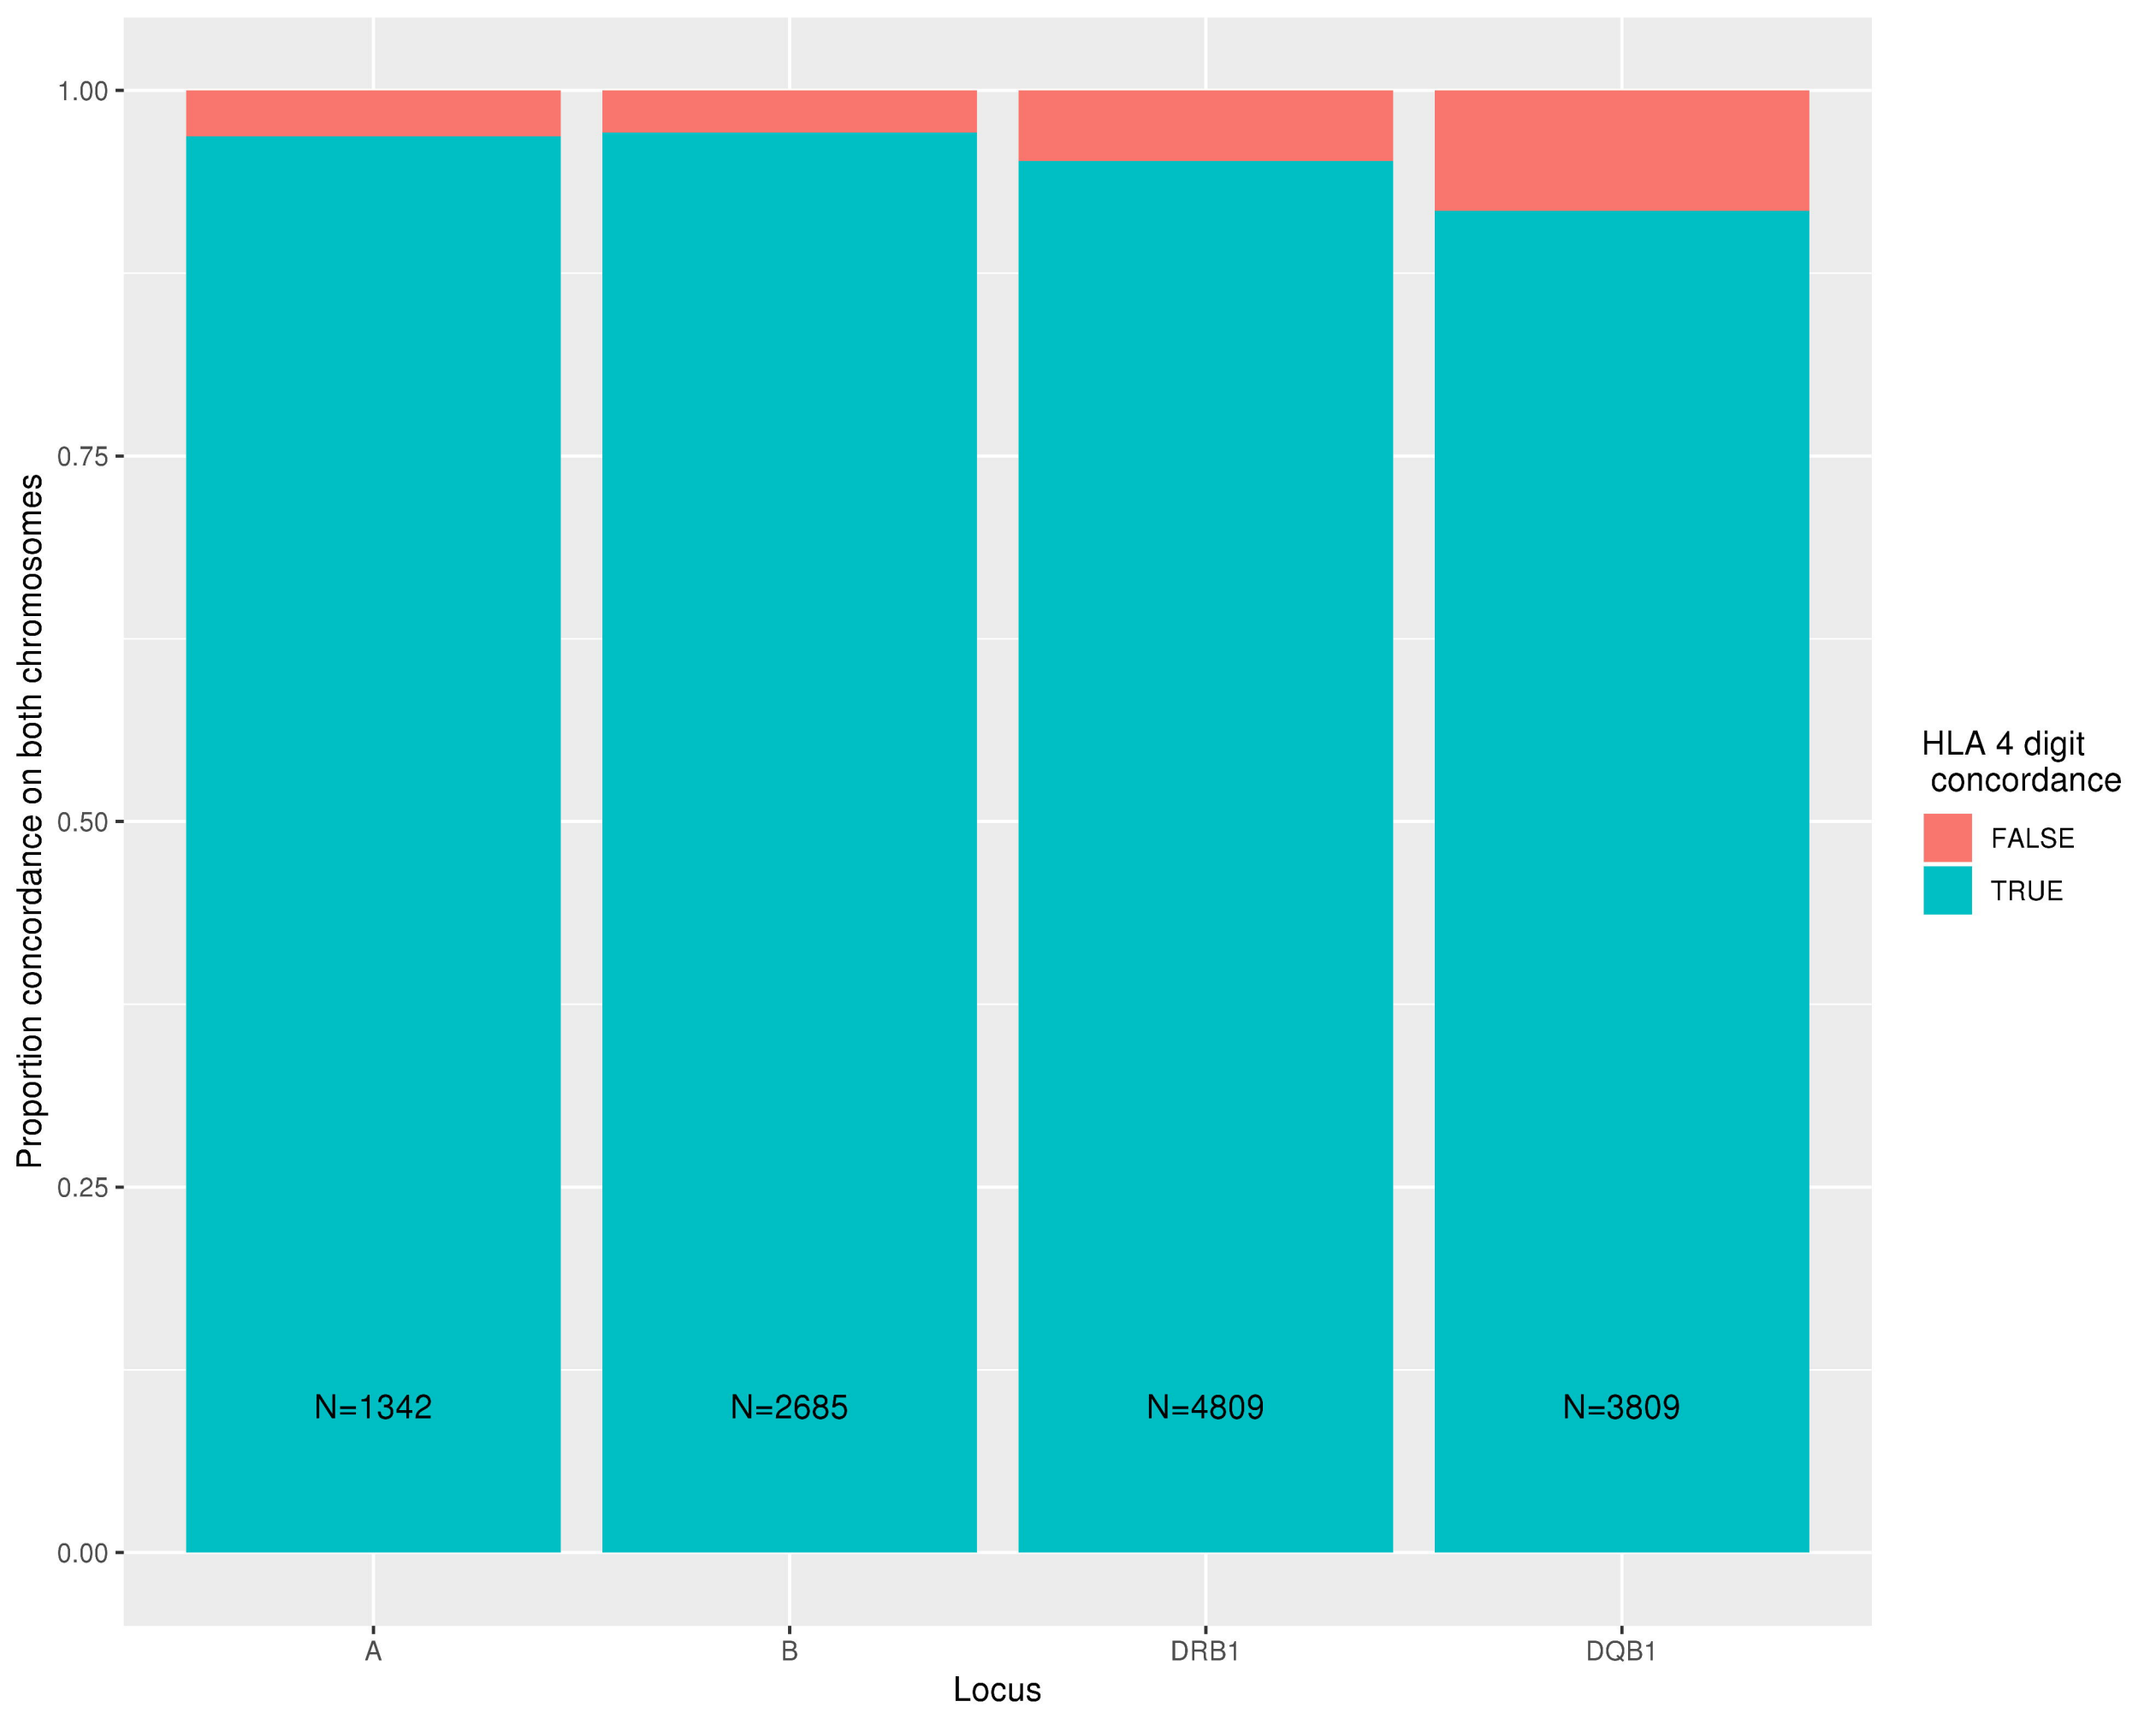

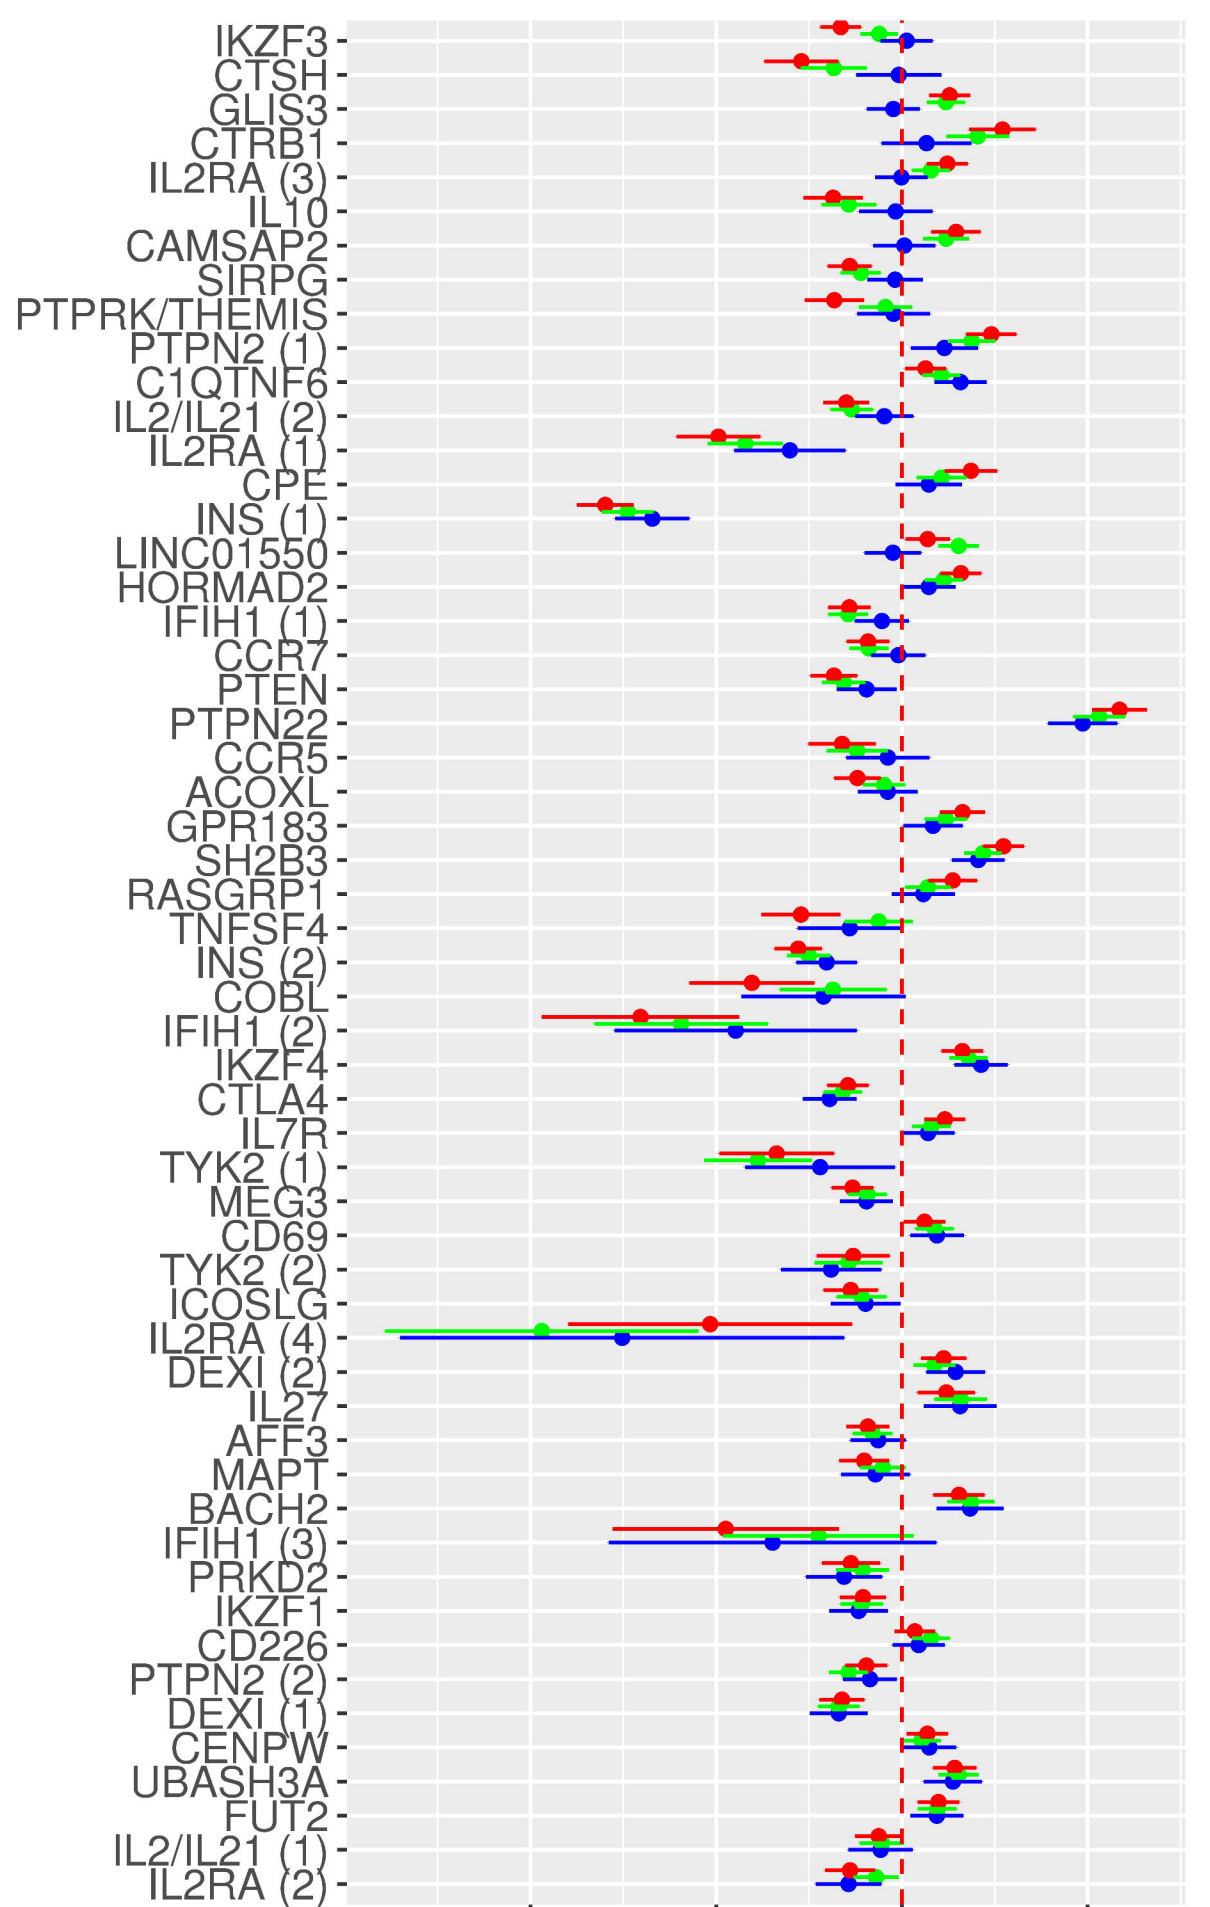

T1D log-odds ratio for those diagnosed under 7 (red), 7-13 (green) and over 13 (blue)

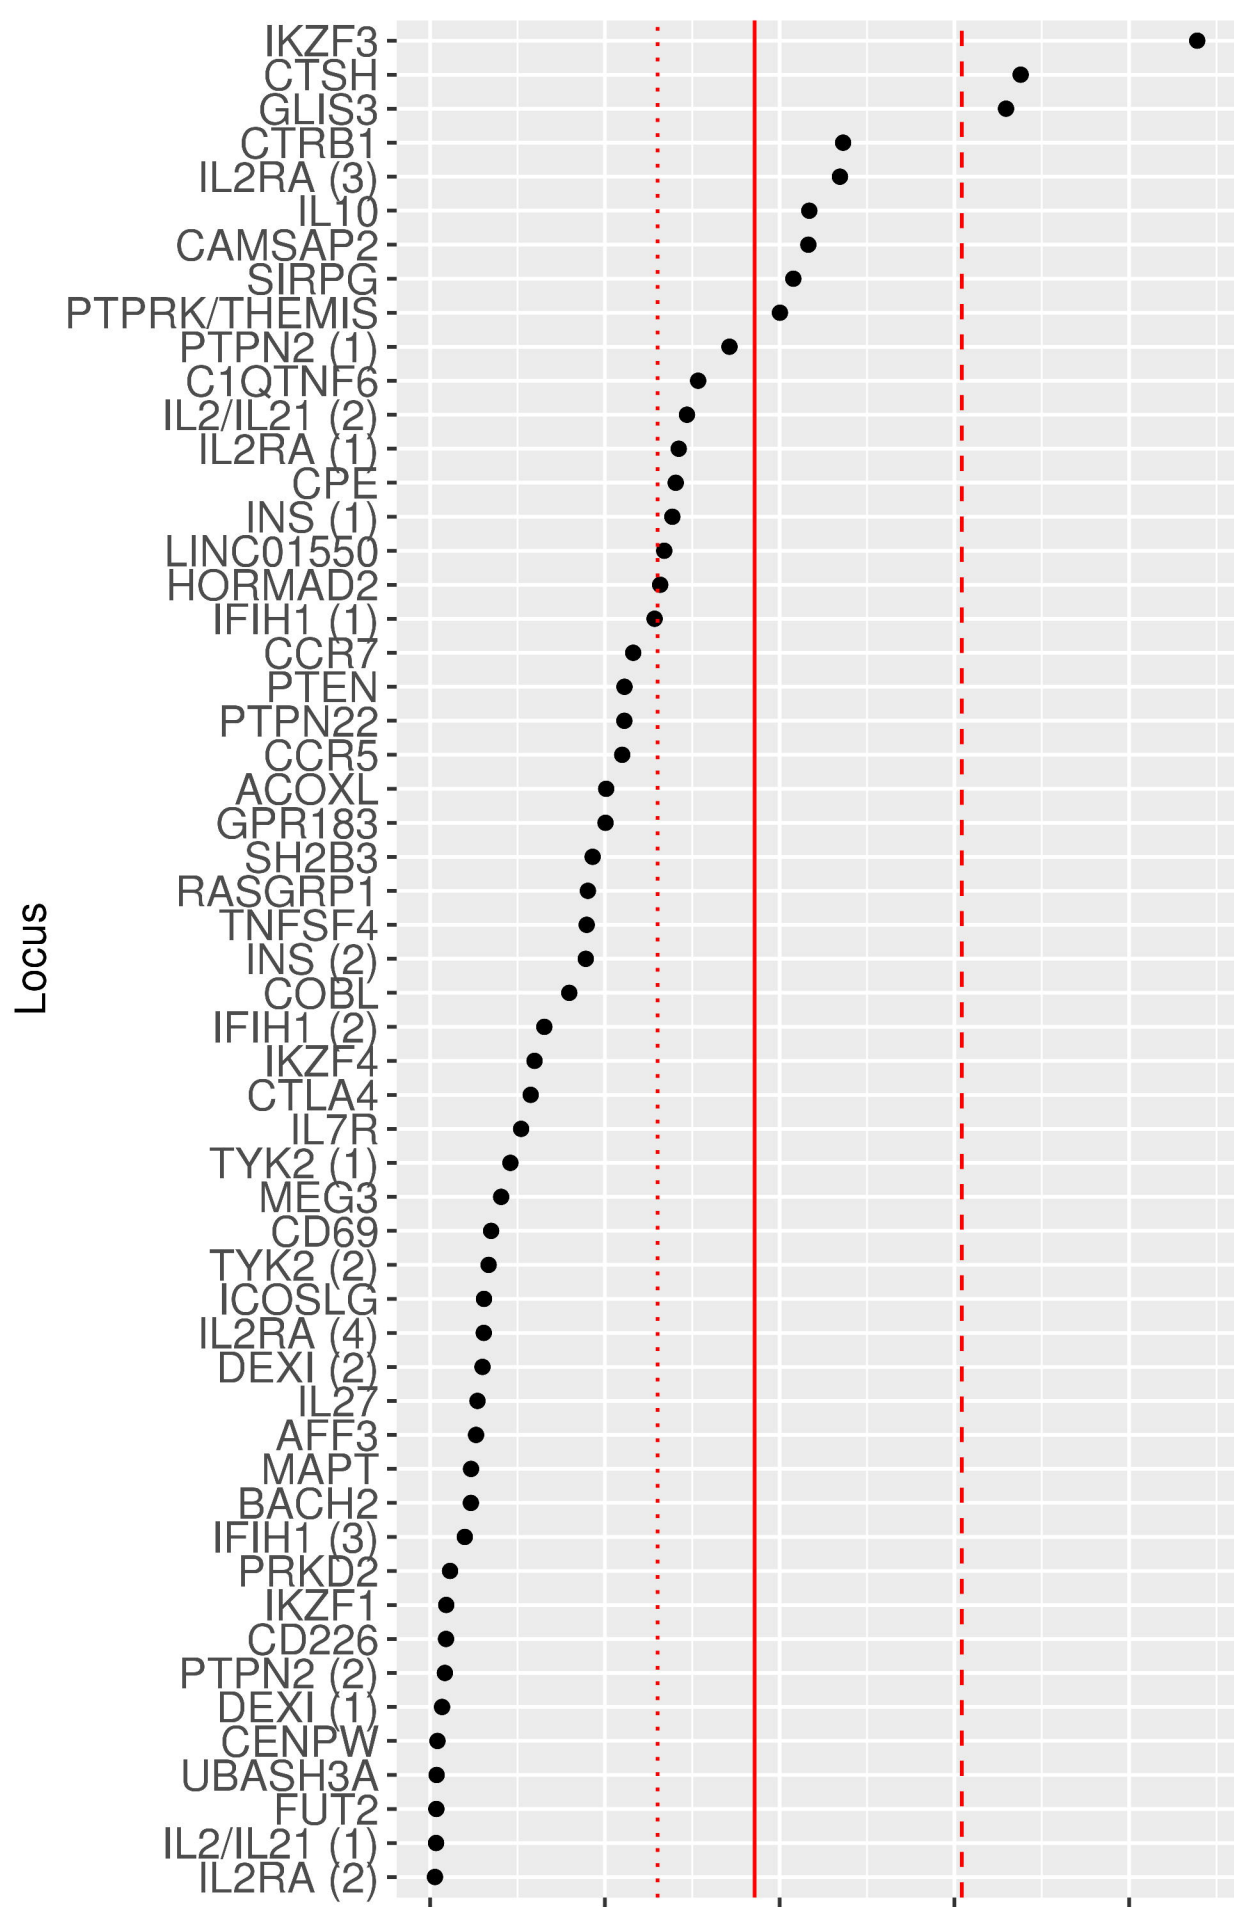

$-\log_{10}(p)$  Likelihood ratio test for heterogeneity between <7 and >13

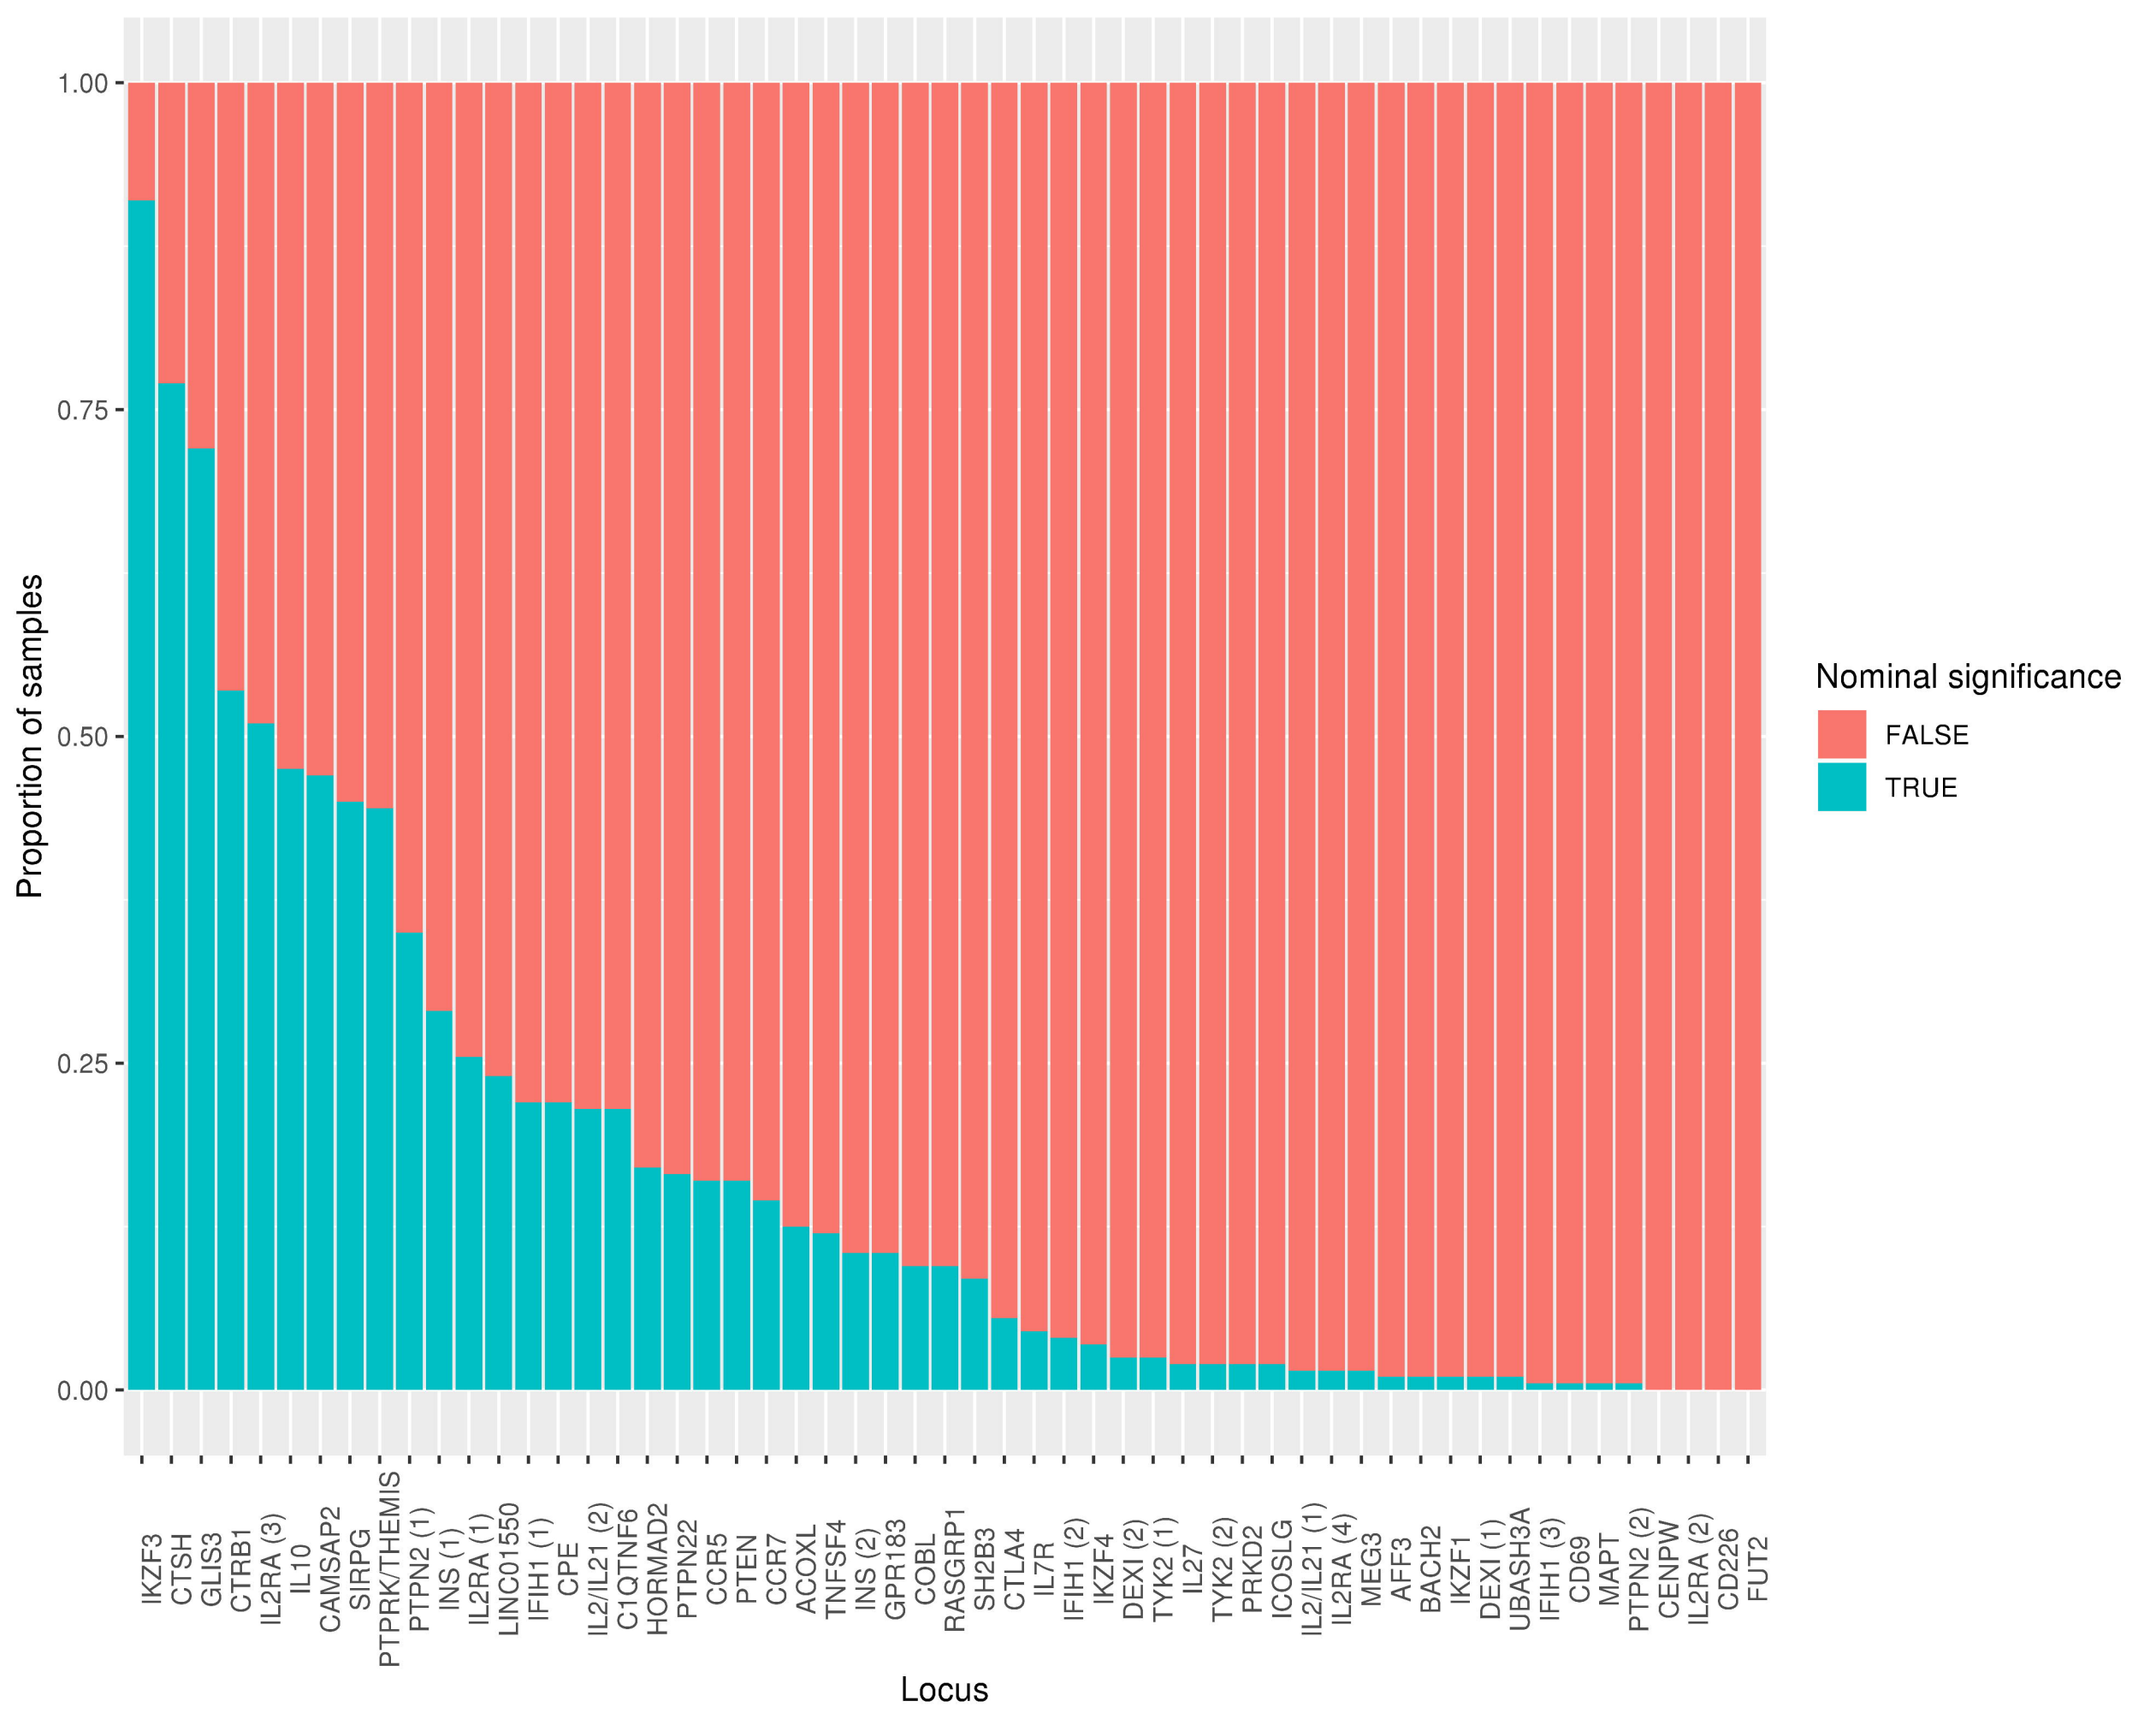

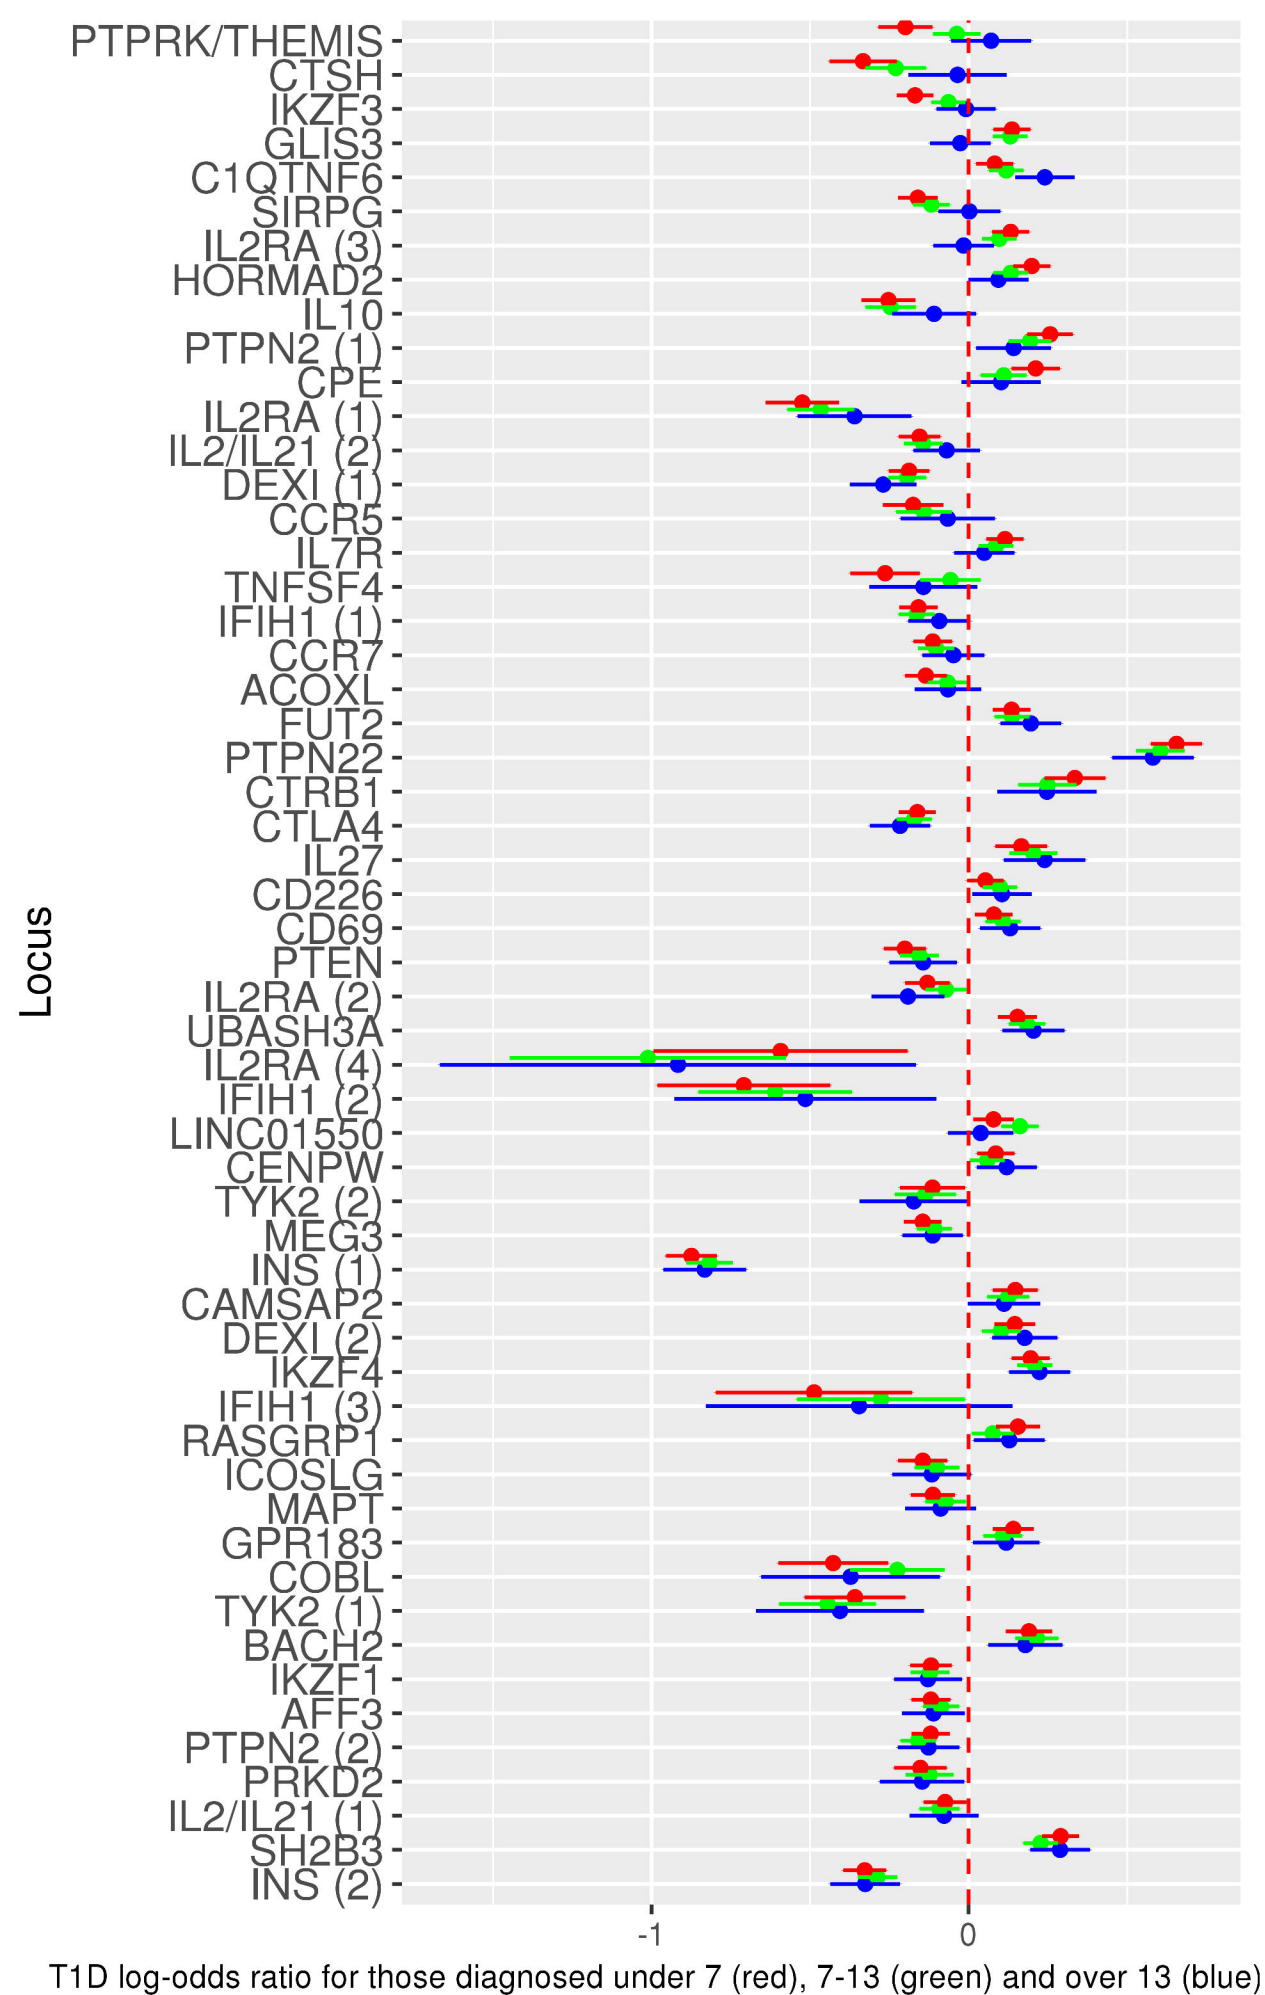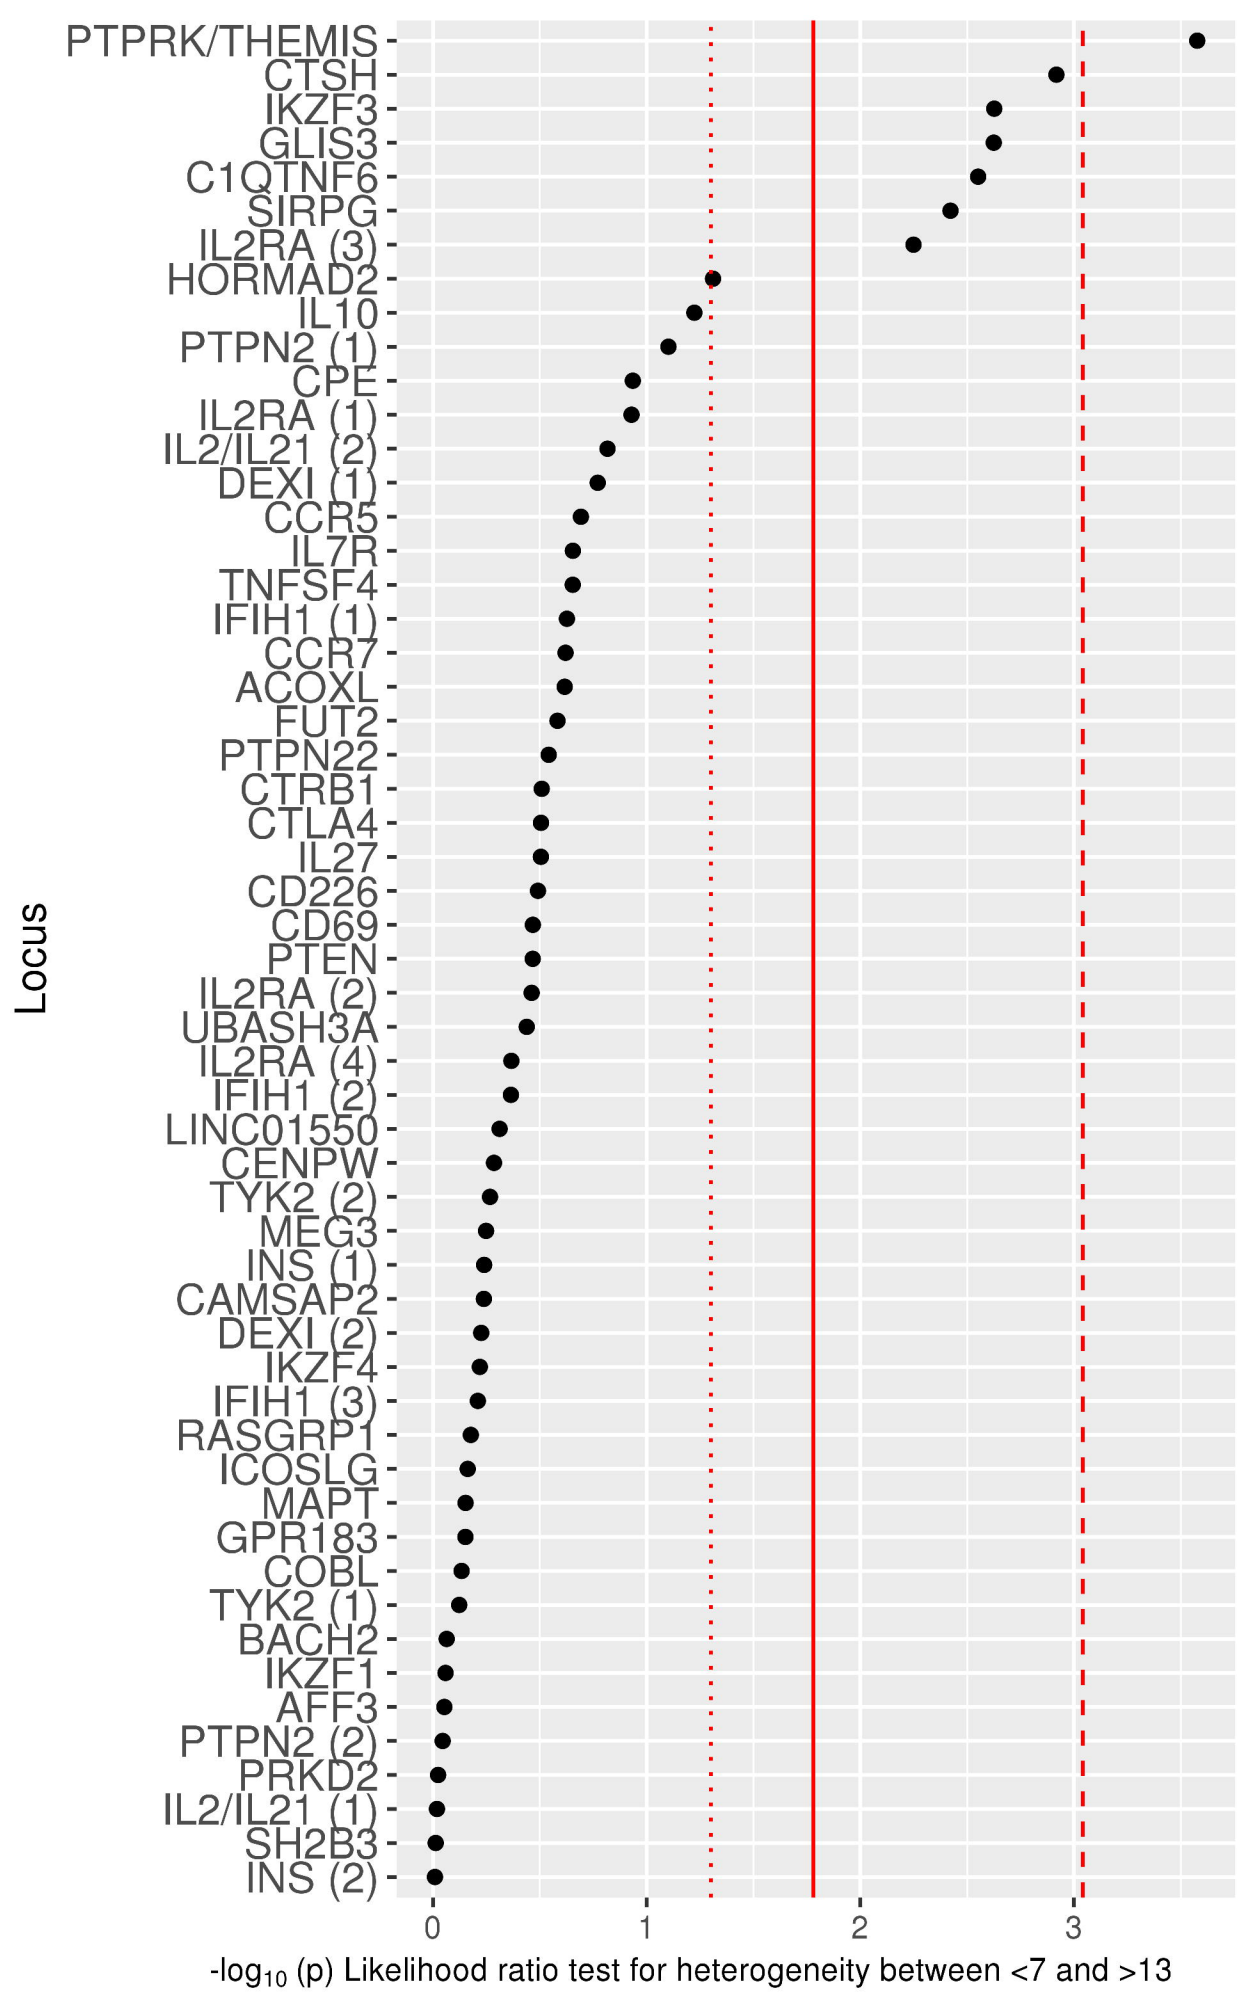

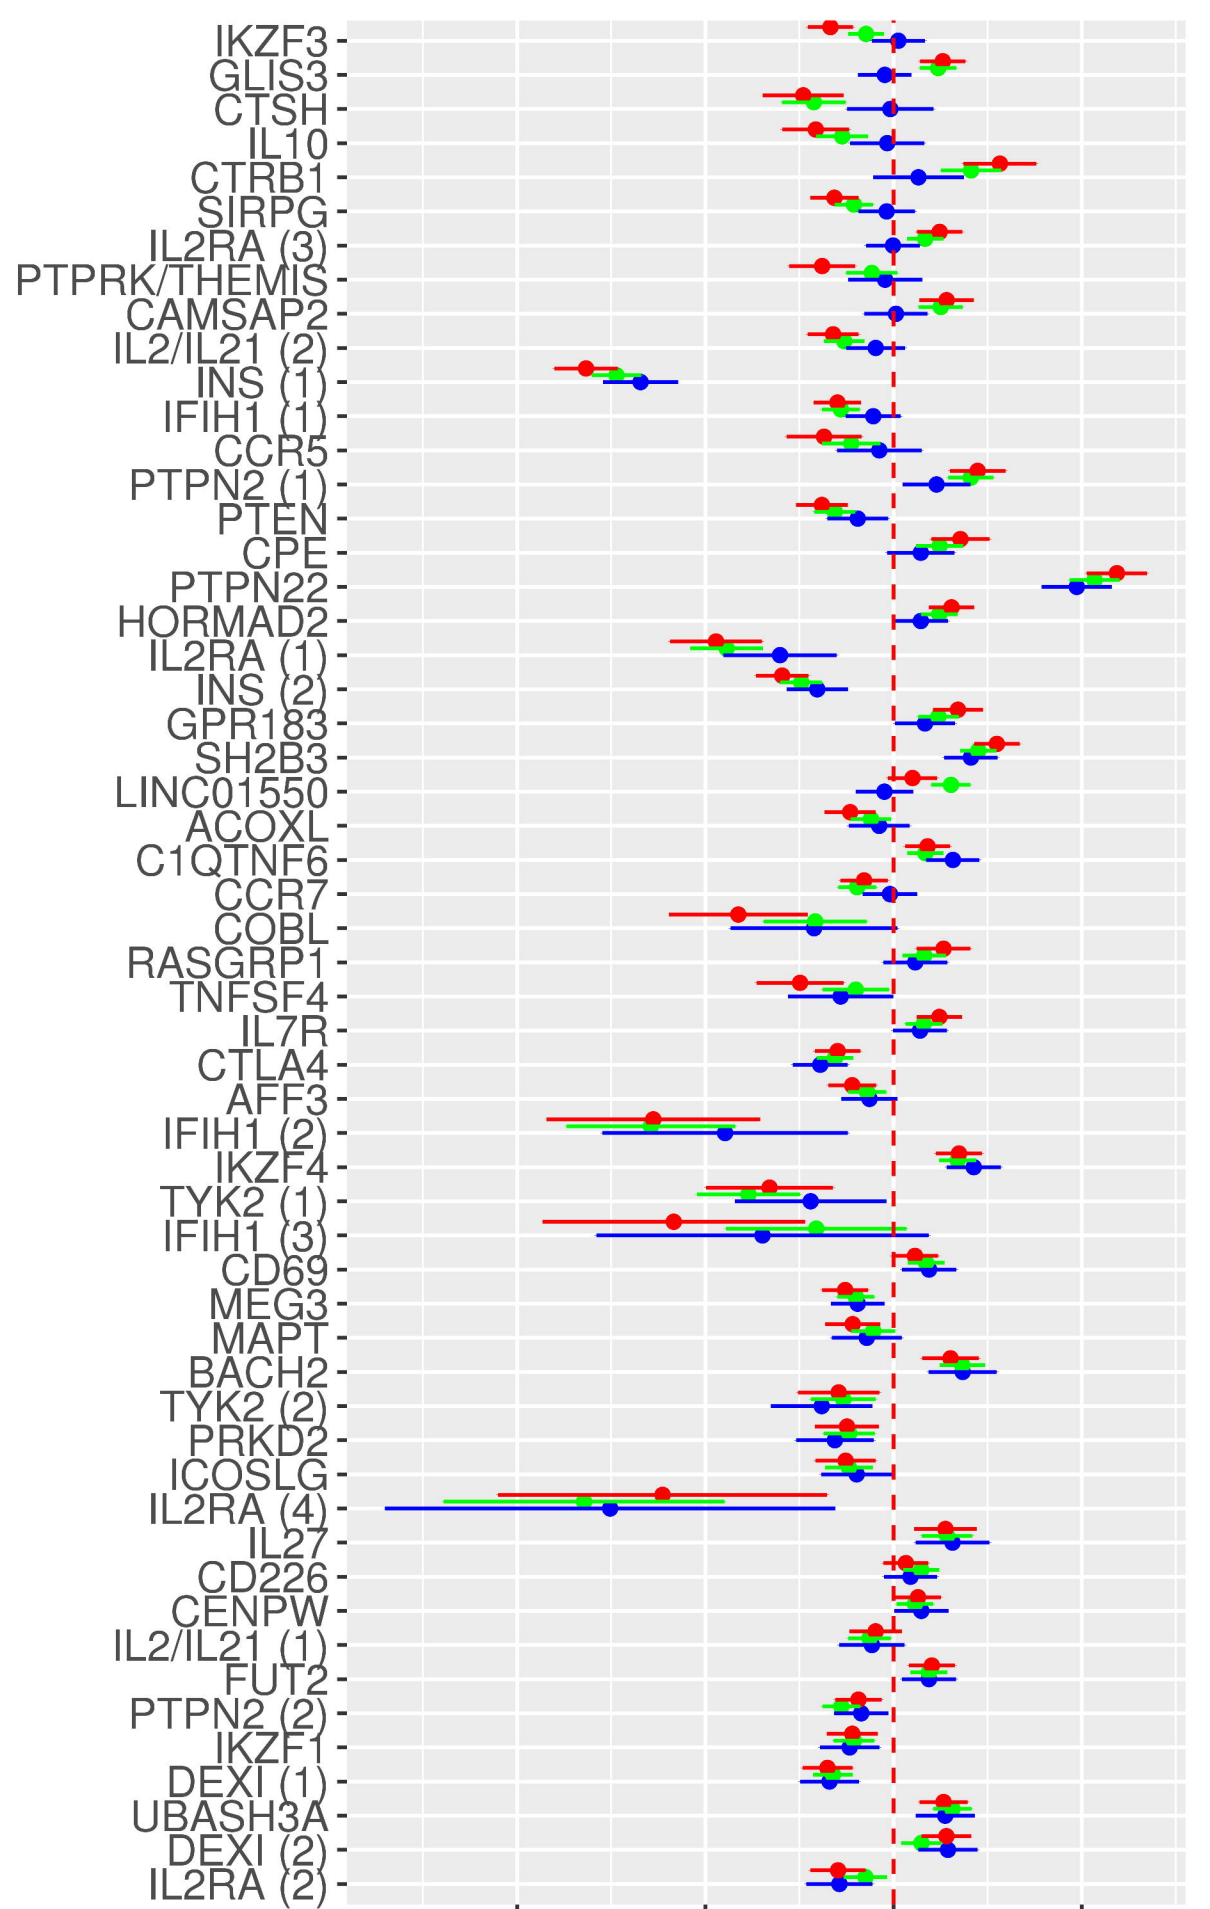

T1D log-odds ratio for those diagnosed under 6 (red), 6-13 (green) and over 13 (blue)

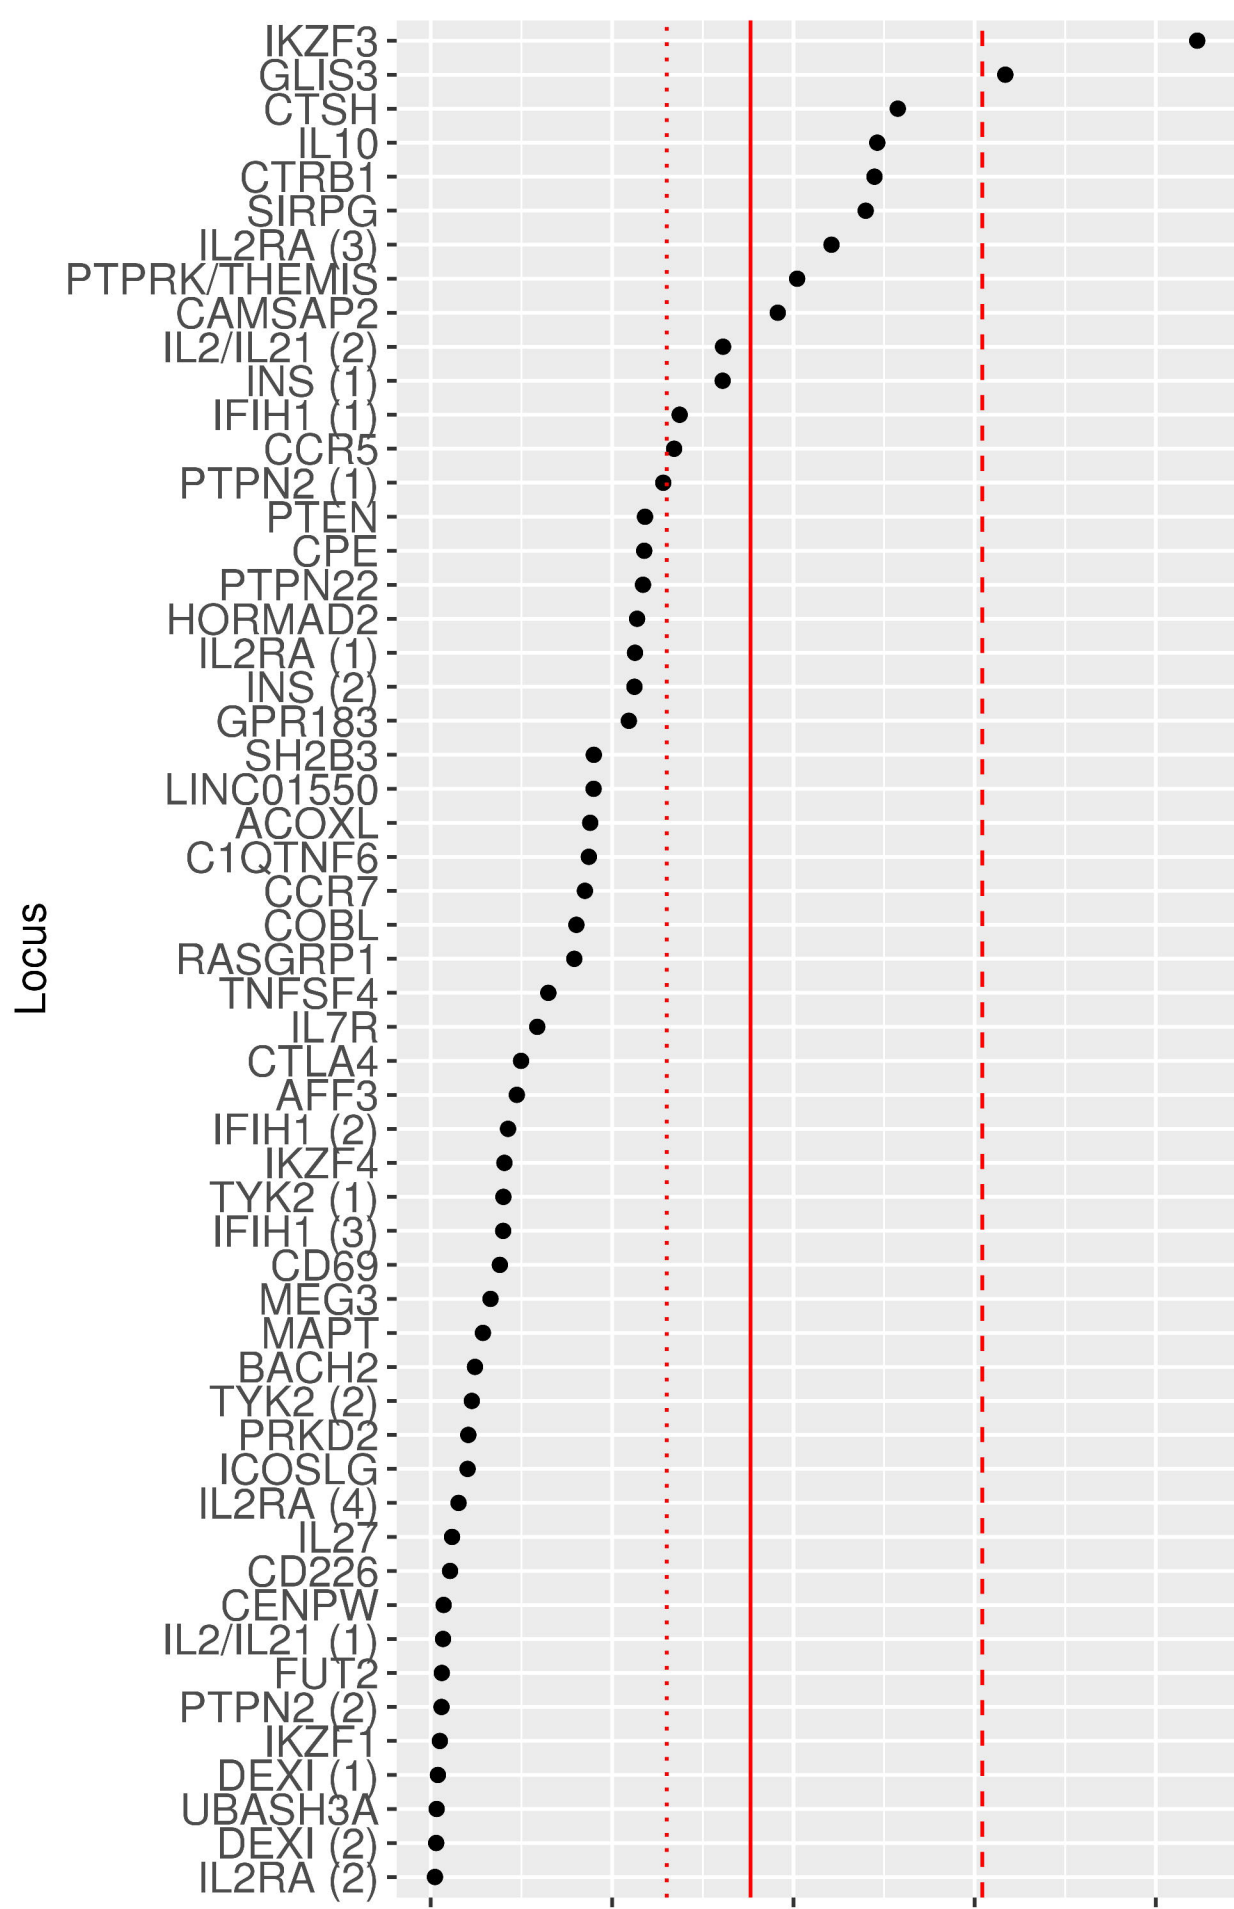

$-\log_{10}(p)$  Likelihood ratio test for heterogeneity between <6 and >13

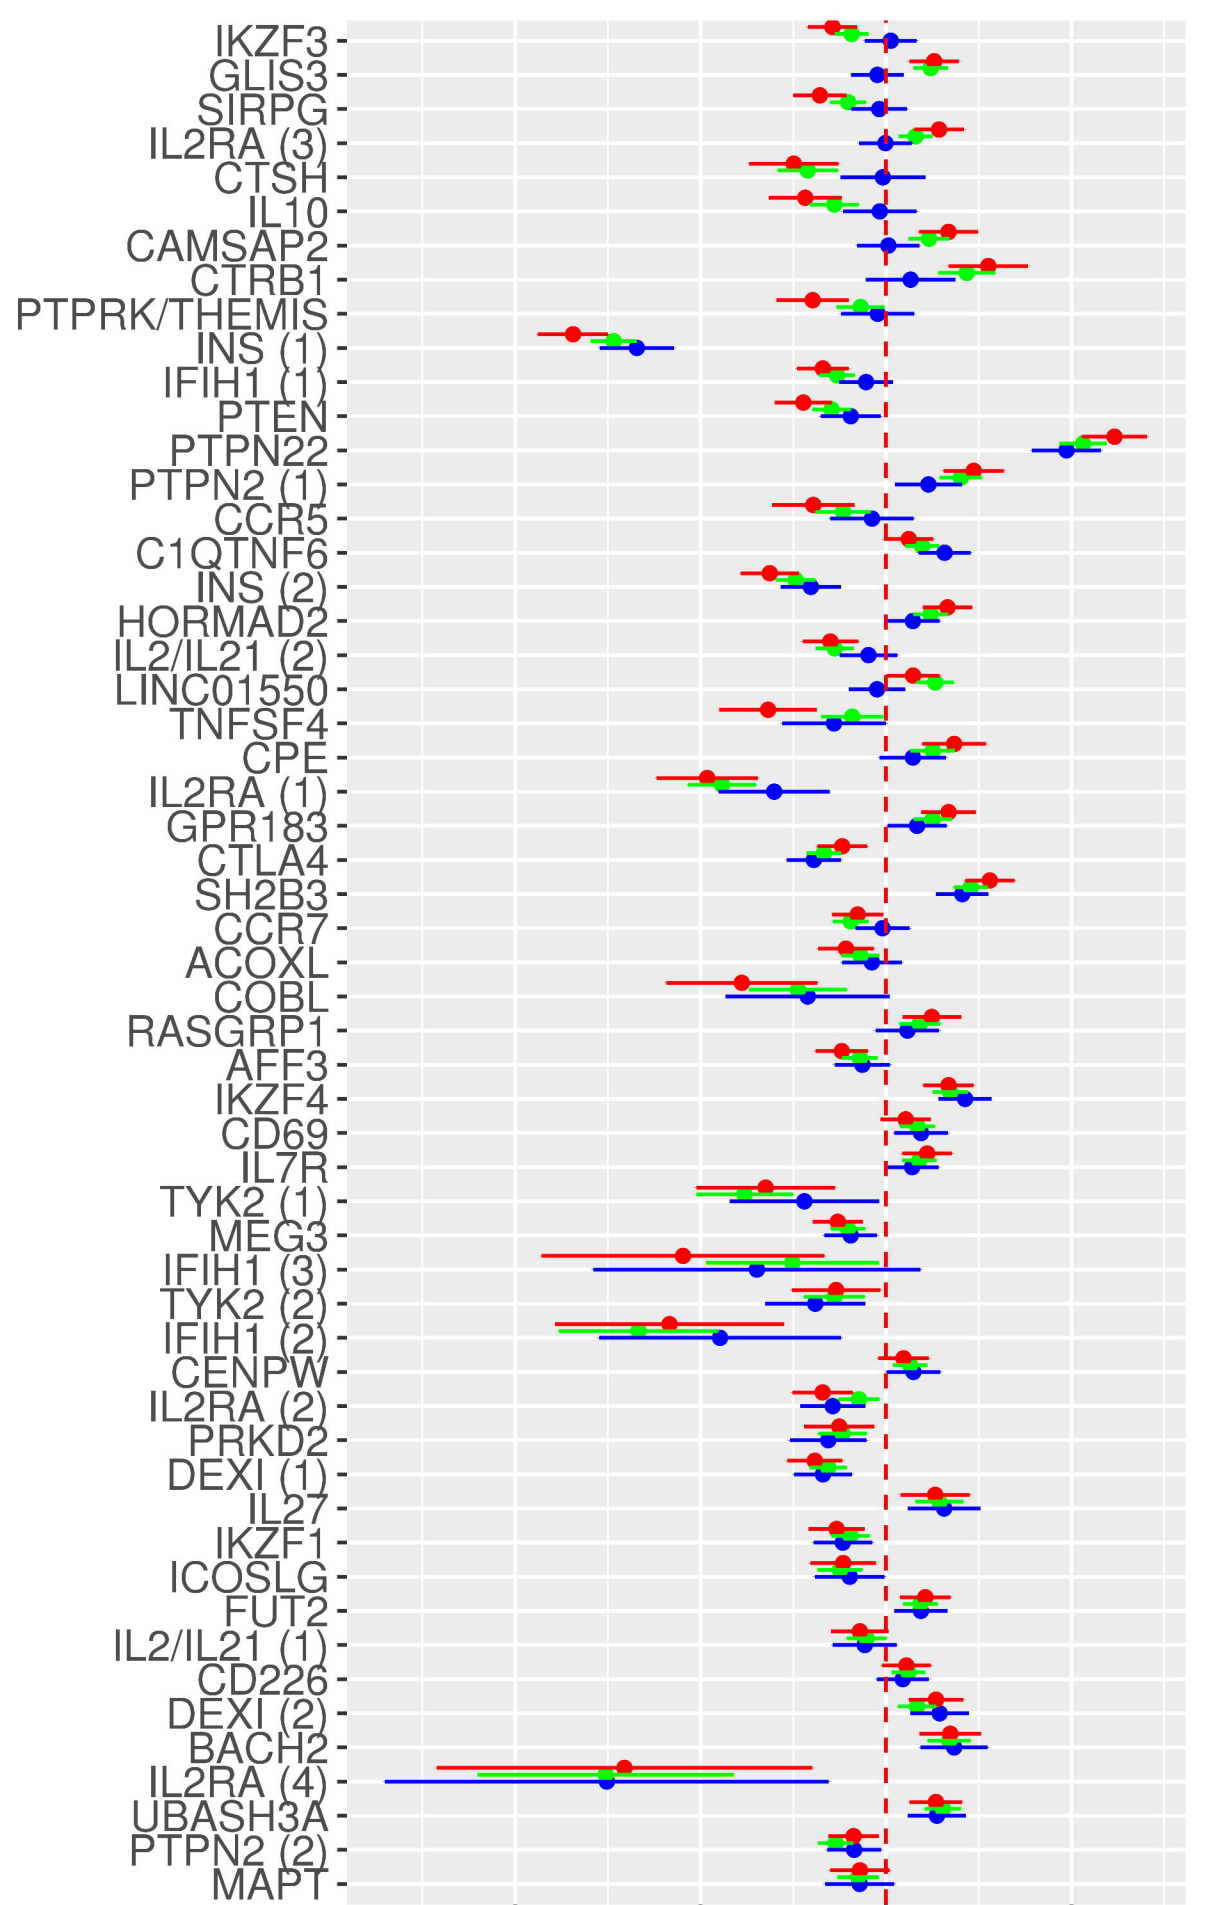

T1D log-odds ratio for those diagnosed under 5 (red), 5-13 (green) and over 13 (blue)

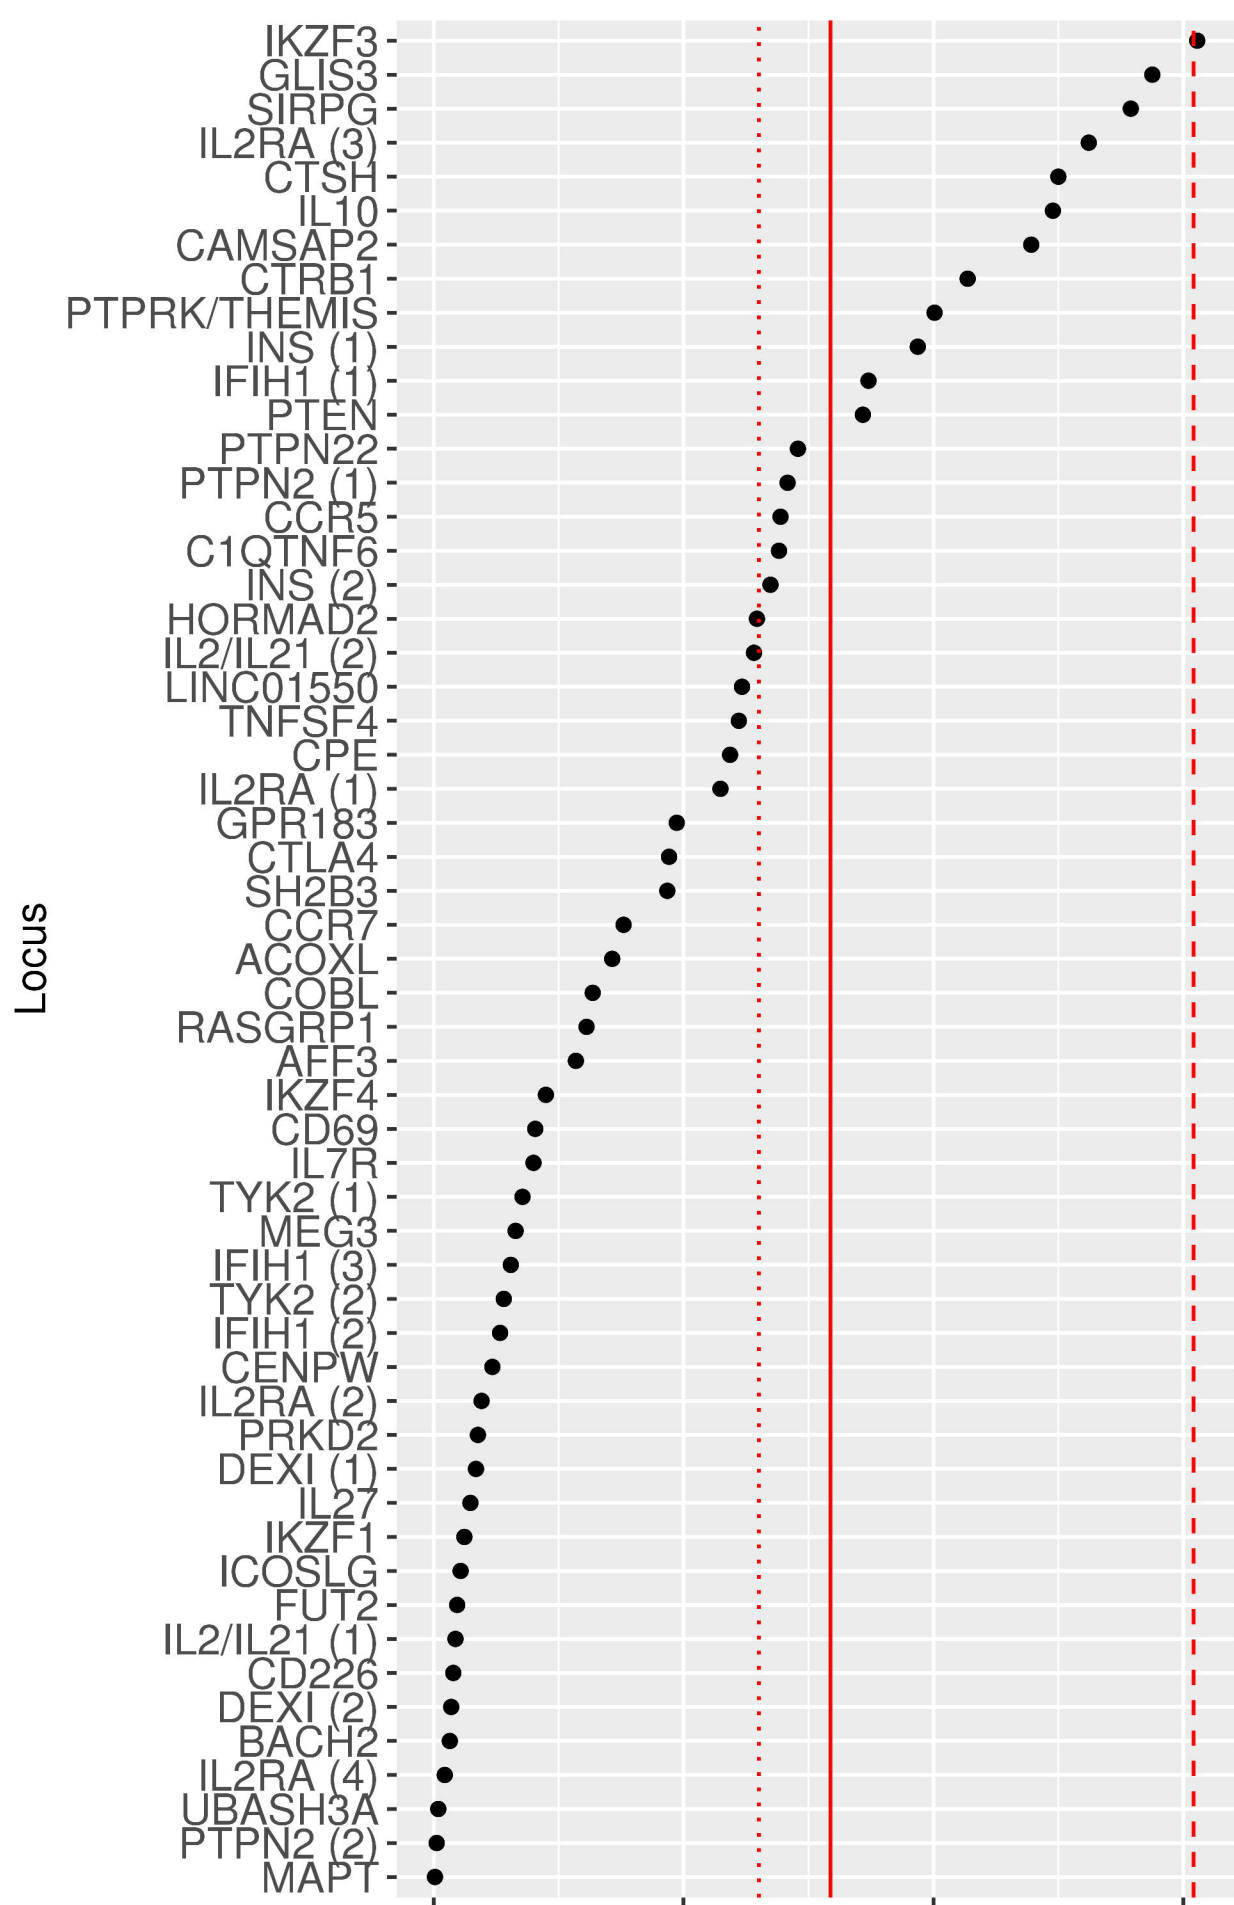

$-\log_{10}(p)$  Likelihood ratio test for heterogeneity between <5 and >13

# IKZF3

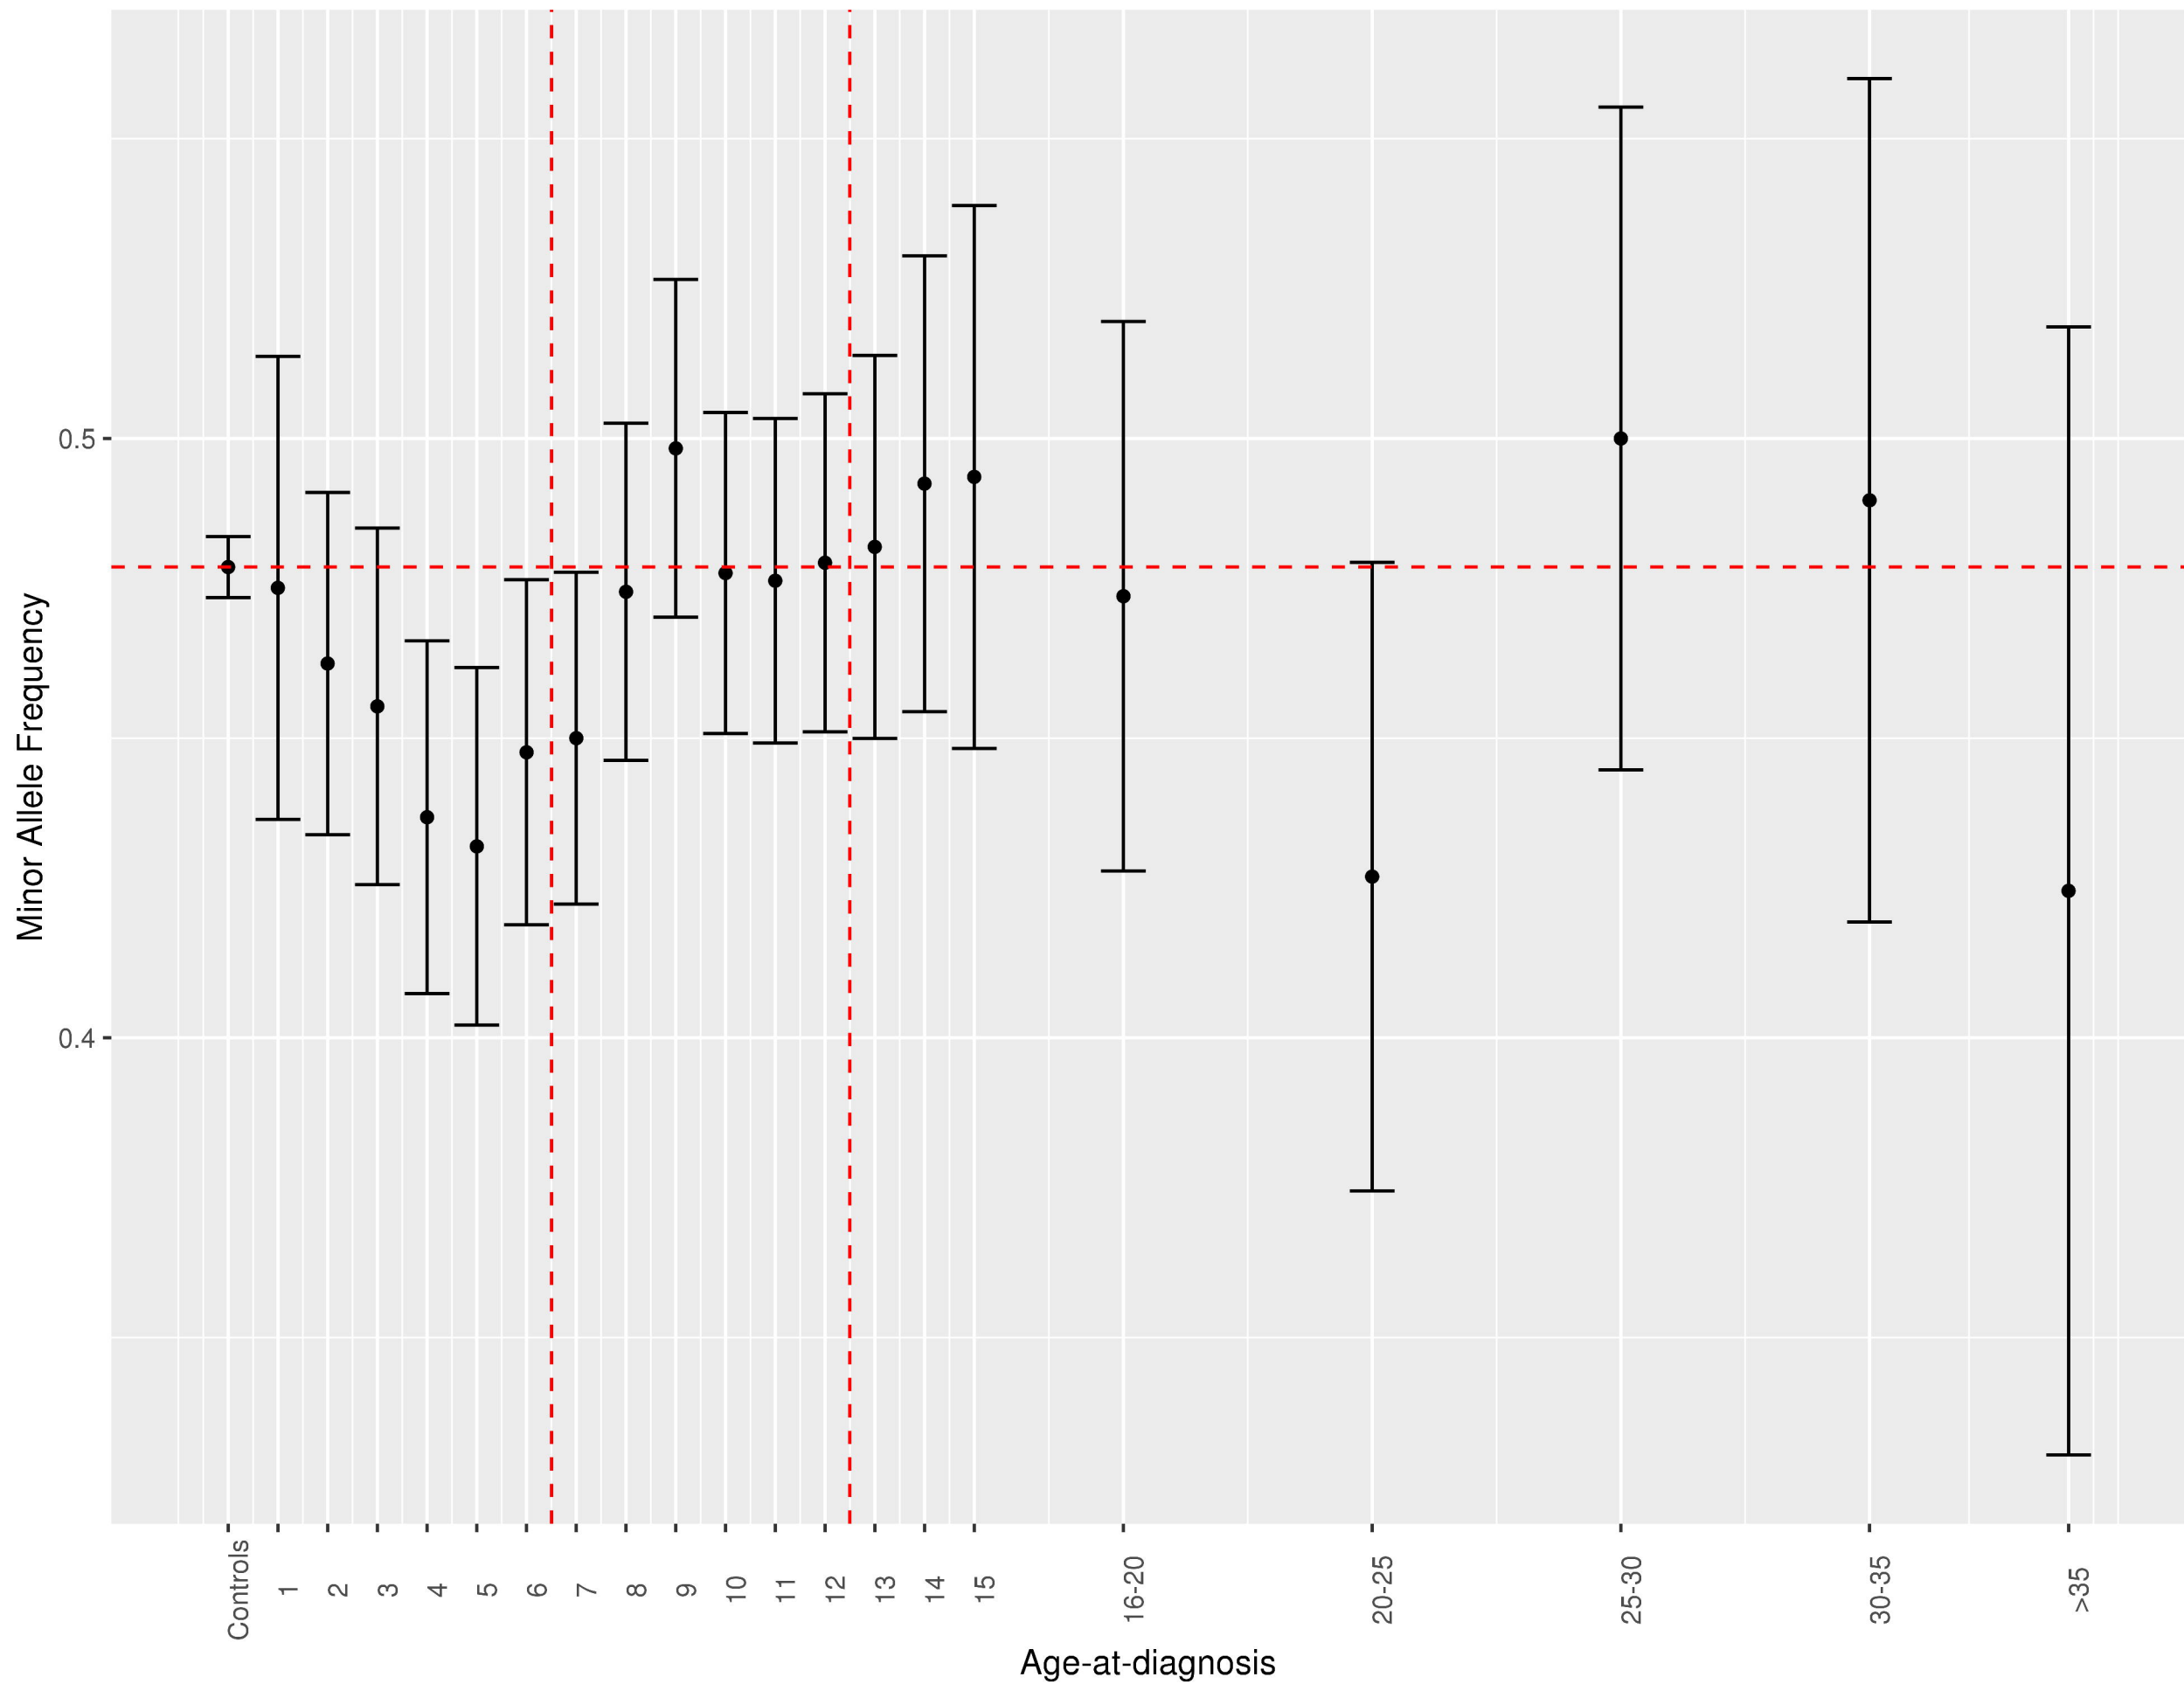

# CTSH

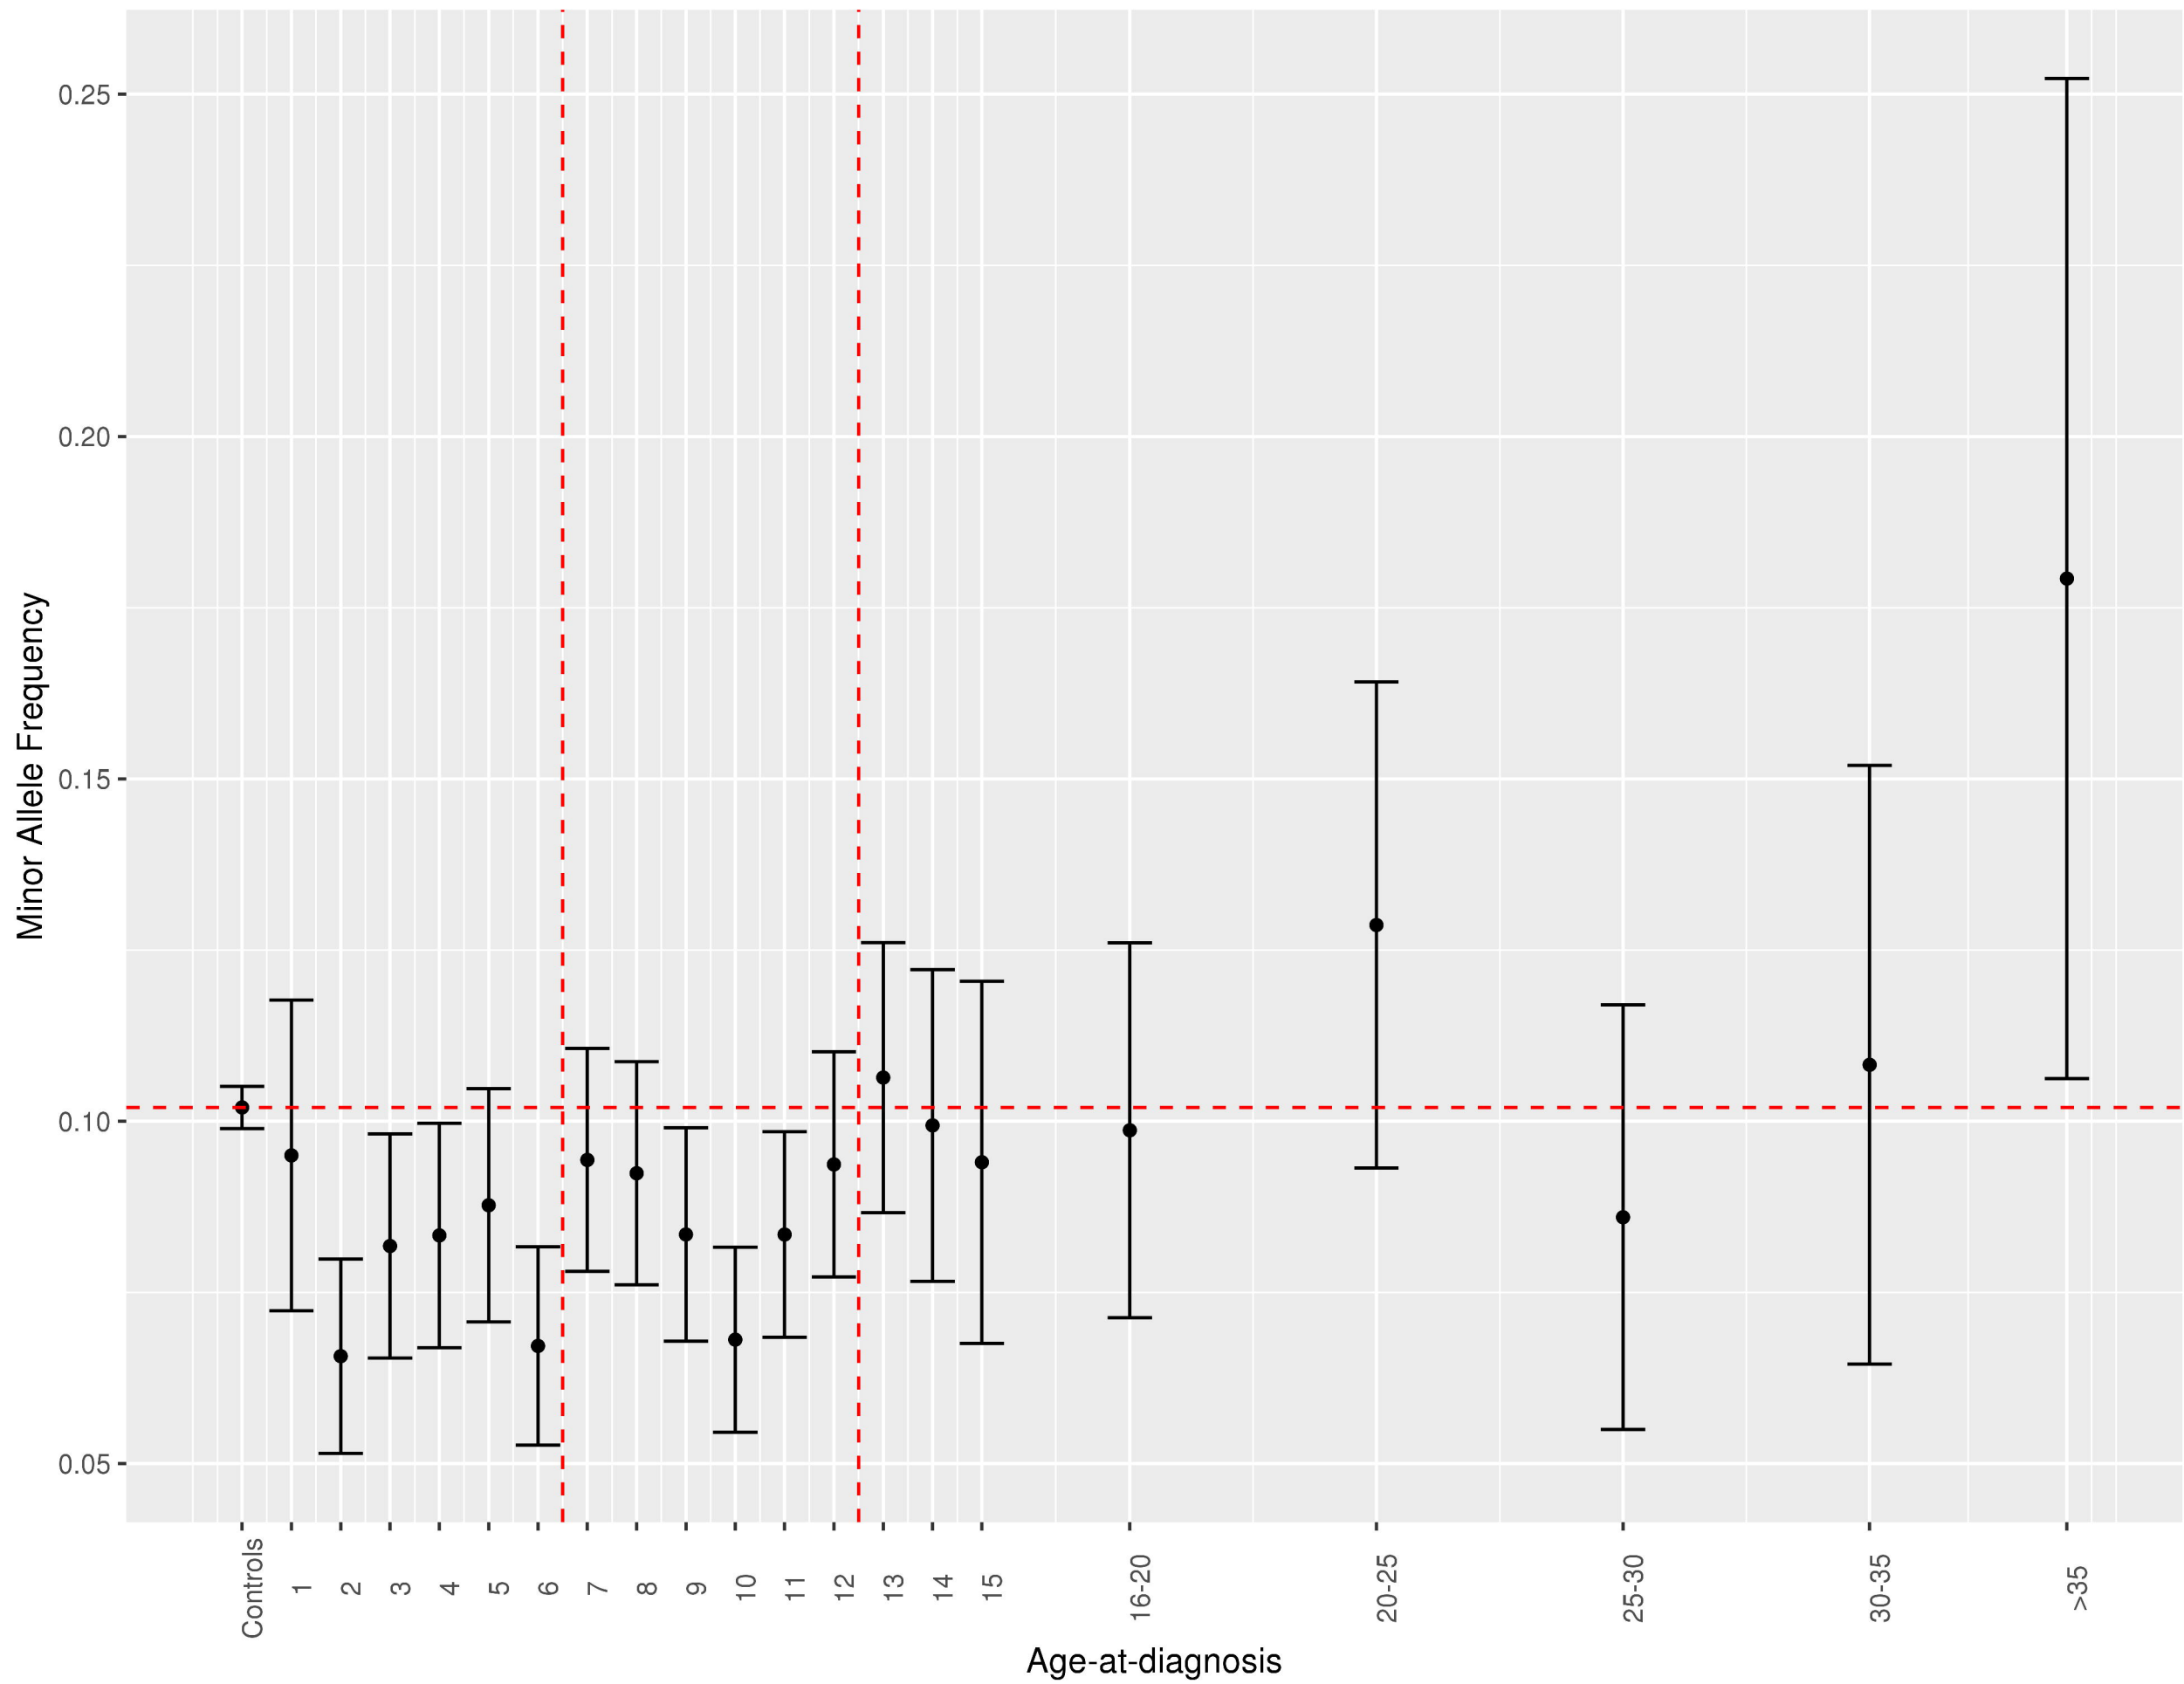



# GLIS3

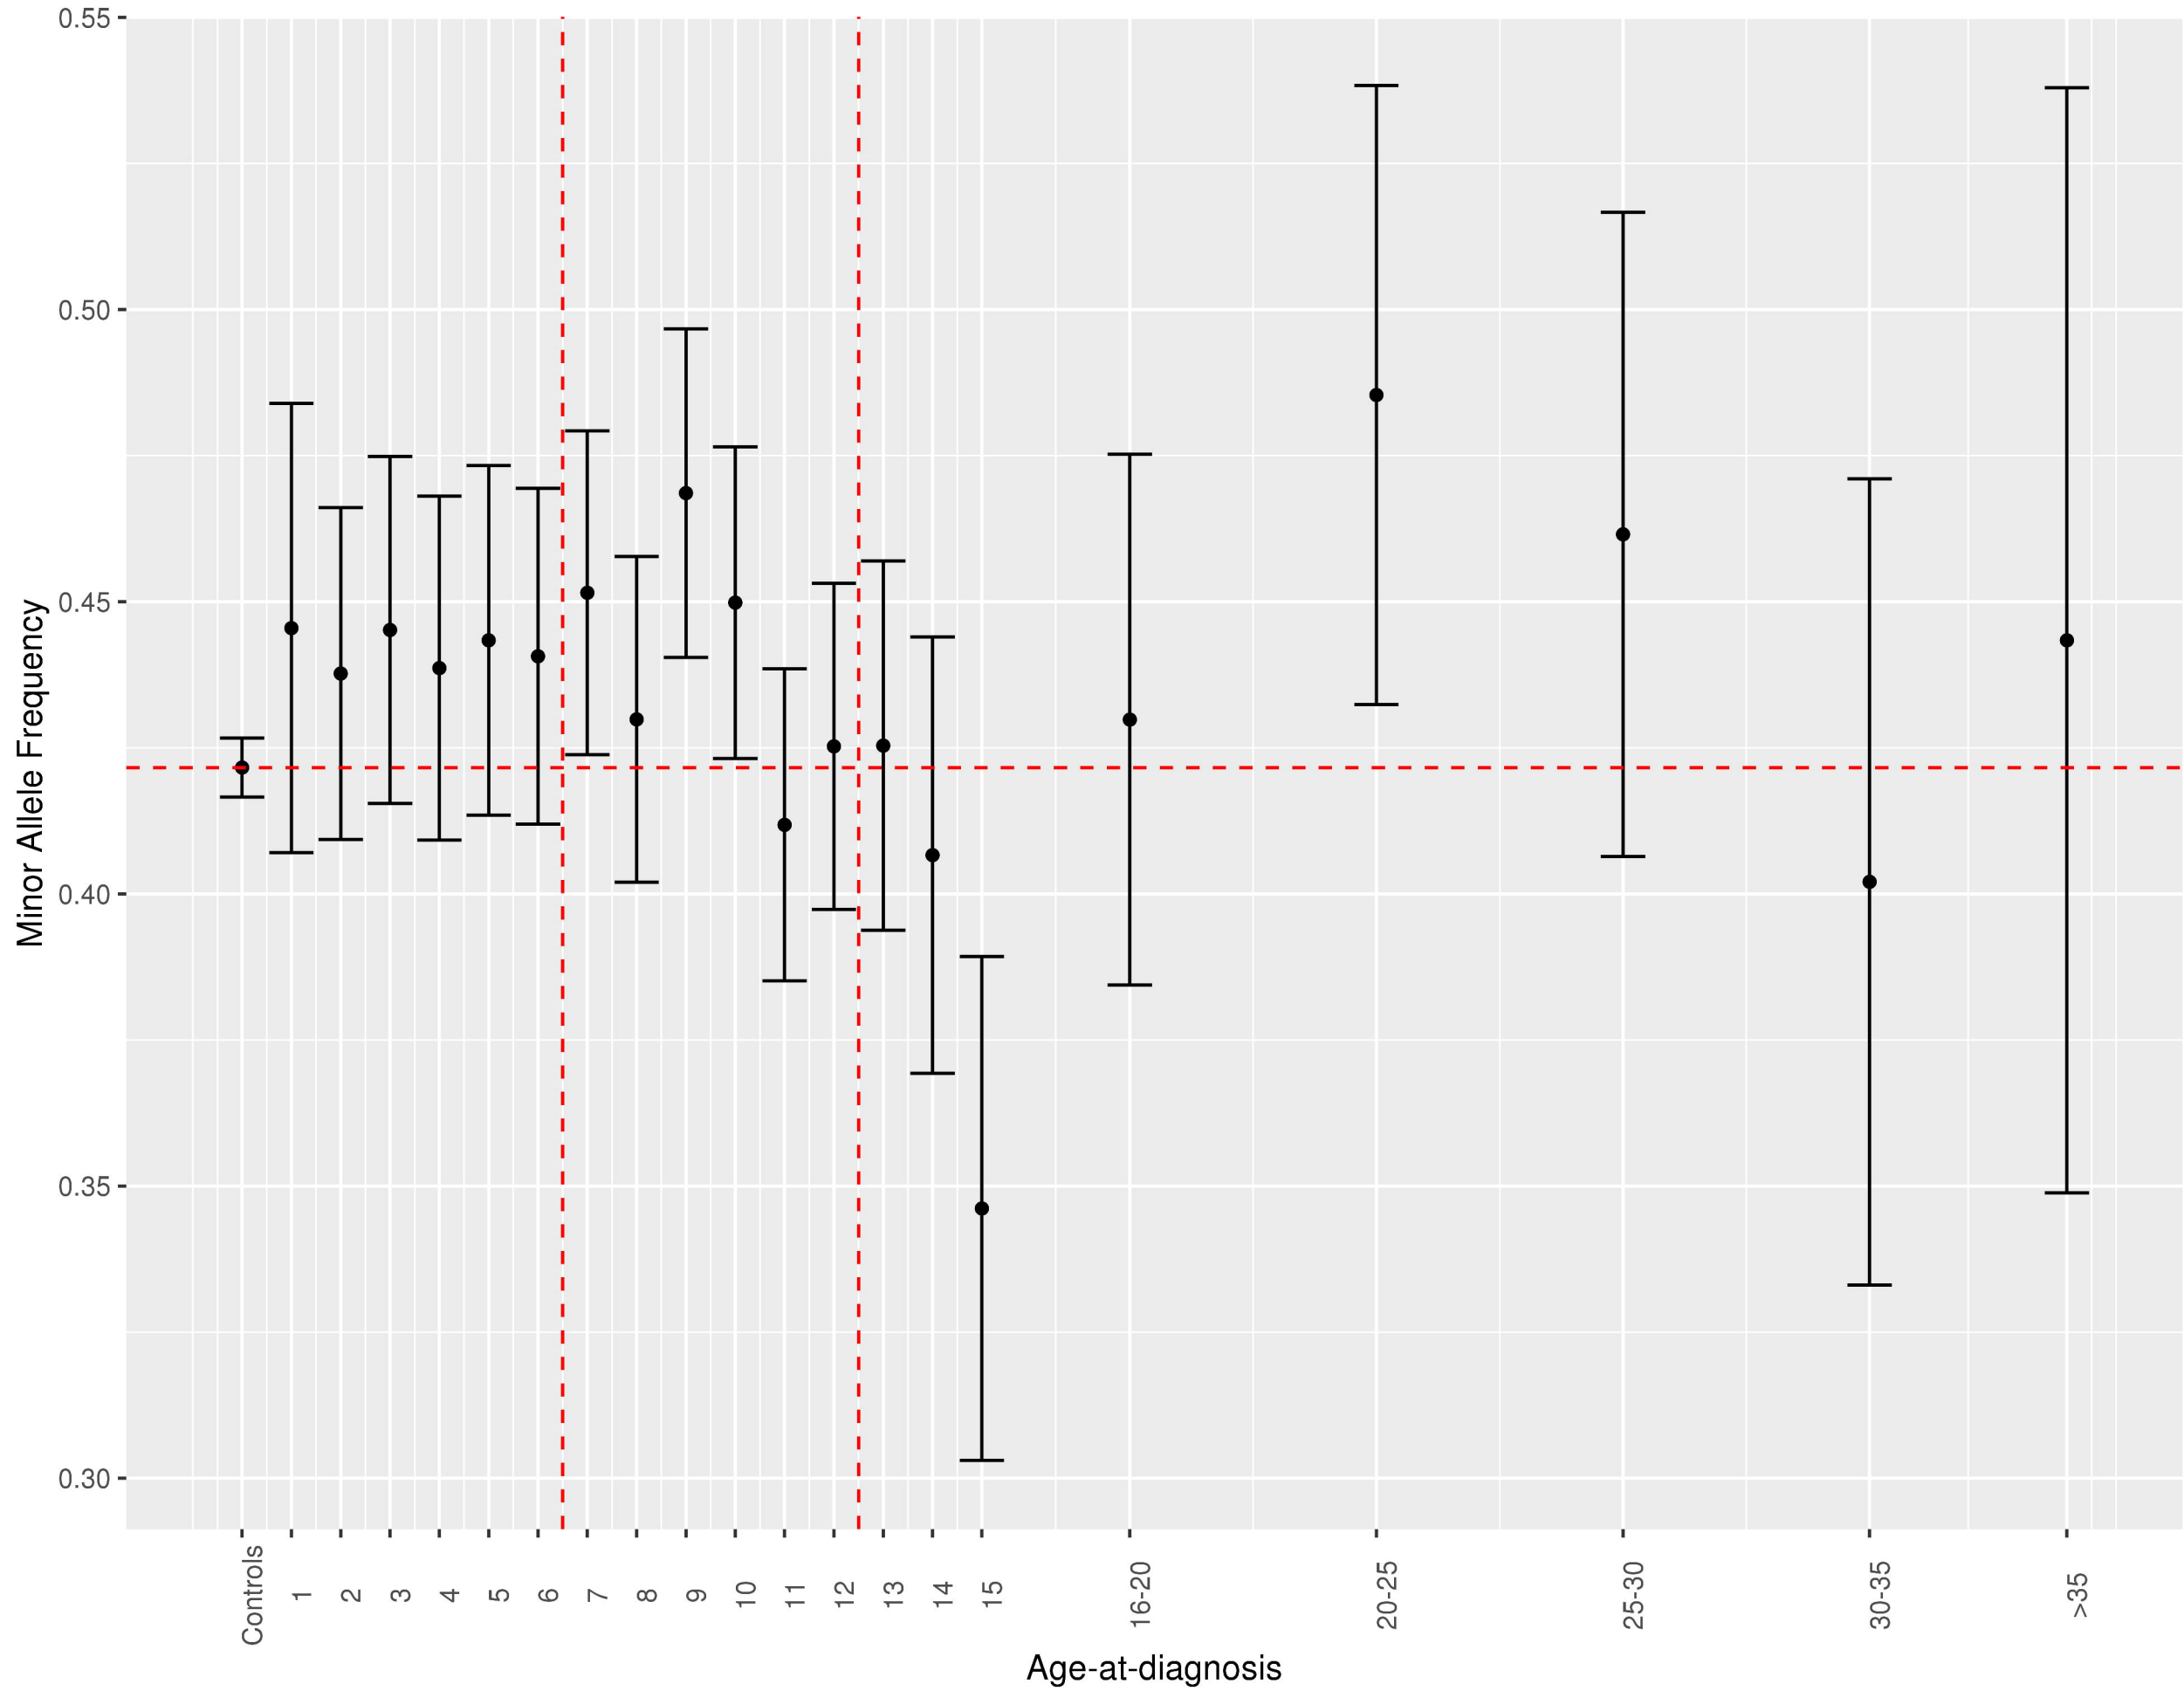

# IL2RA (3)

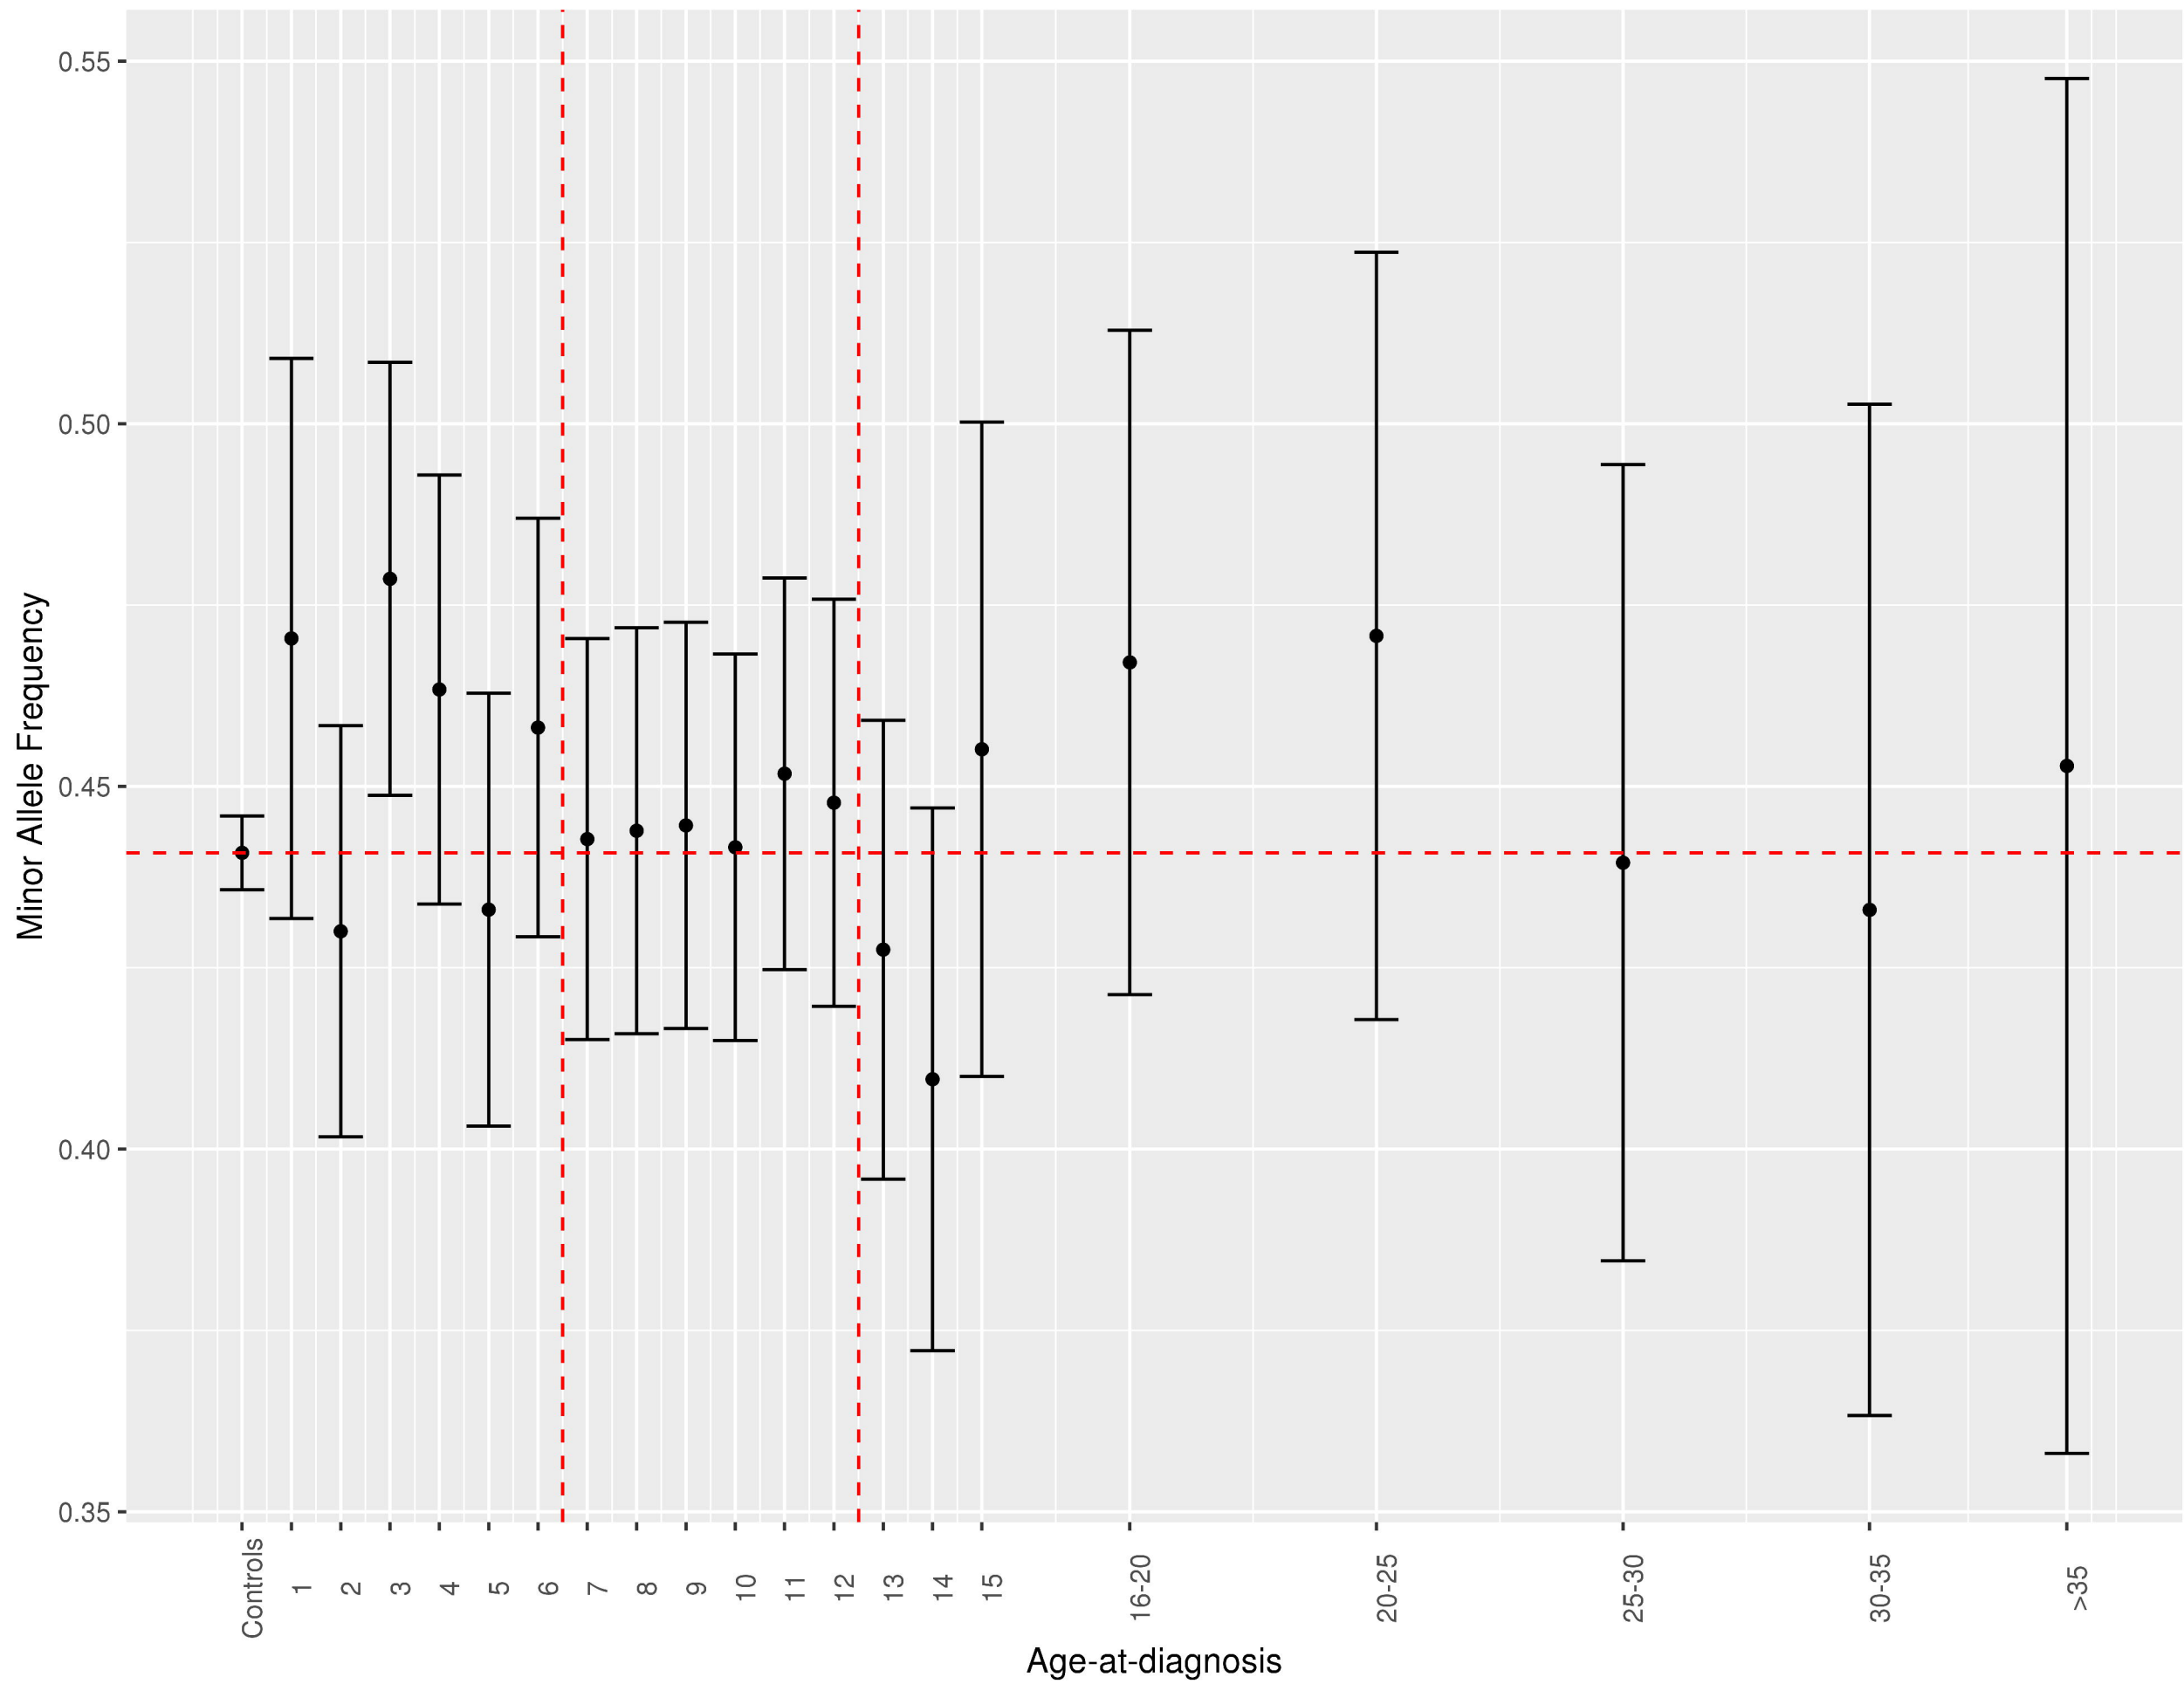

# IL10

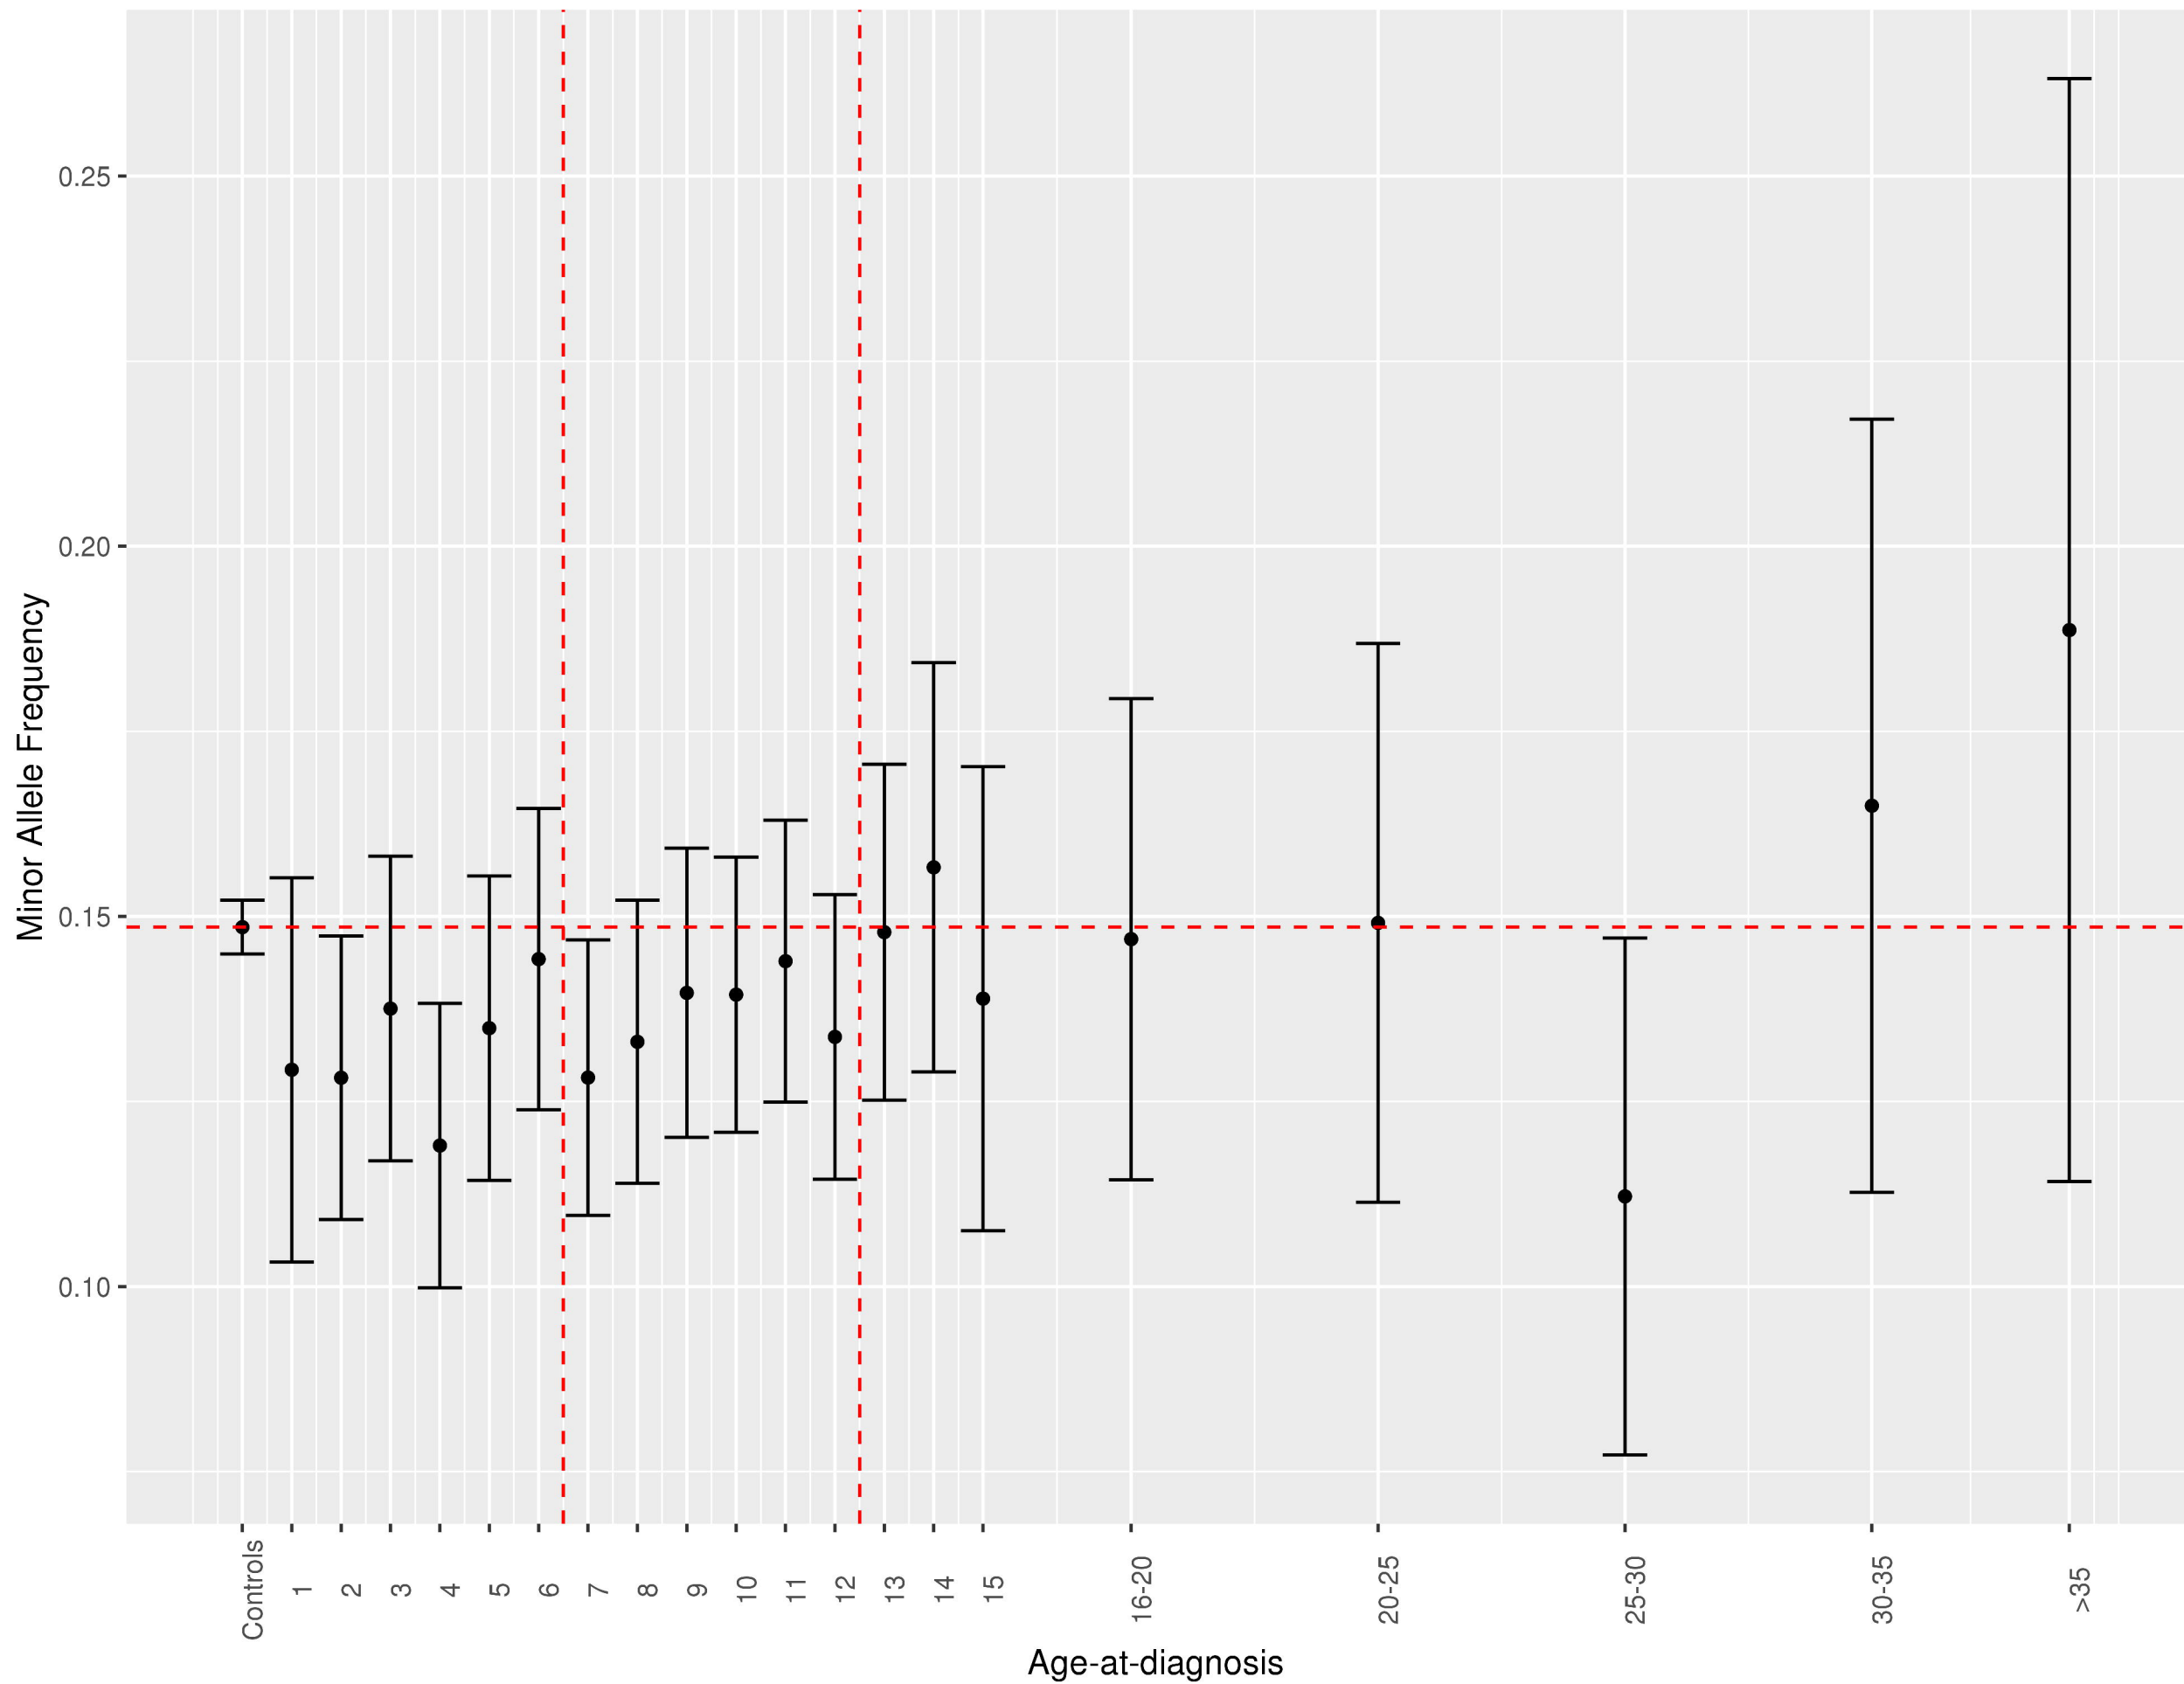

# SIRPG

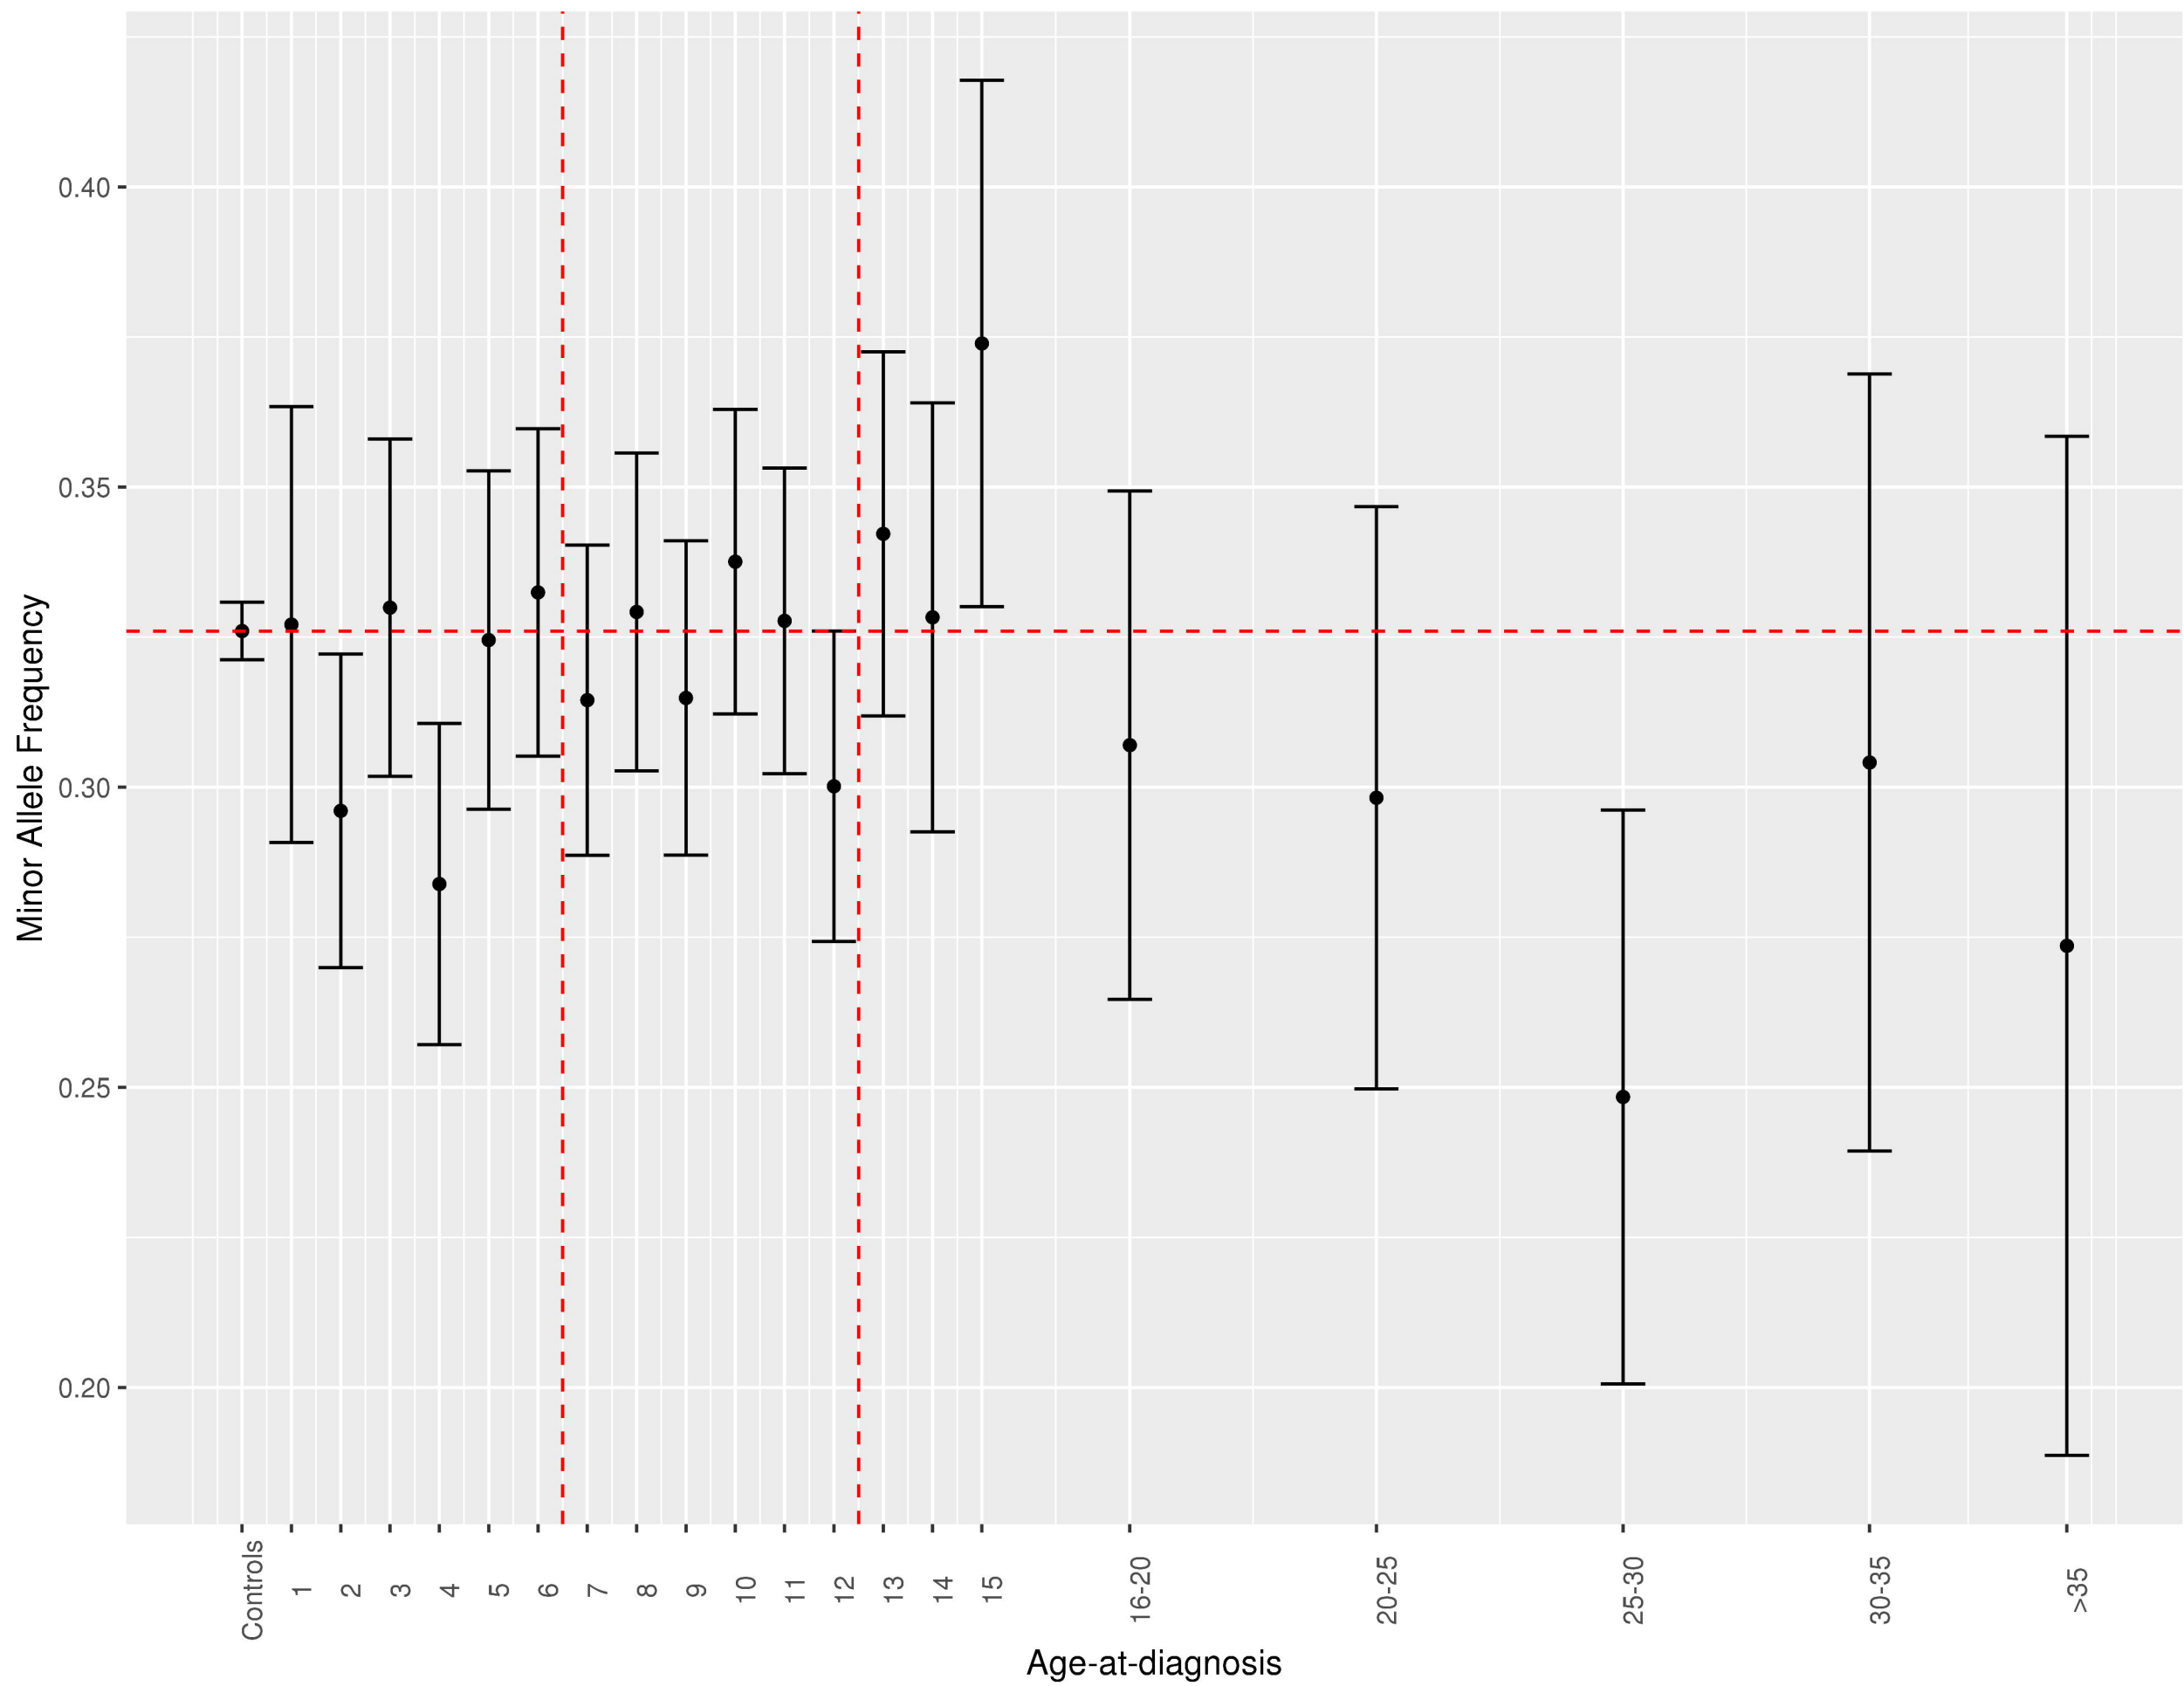

# PTPRK/THEMIS

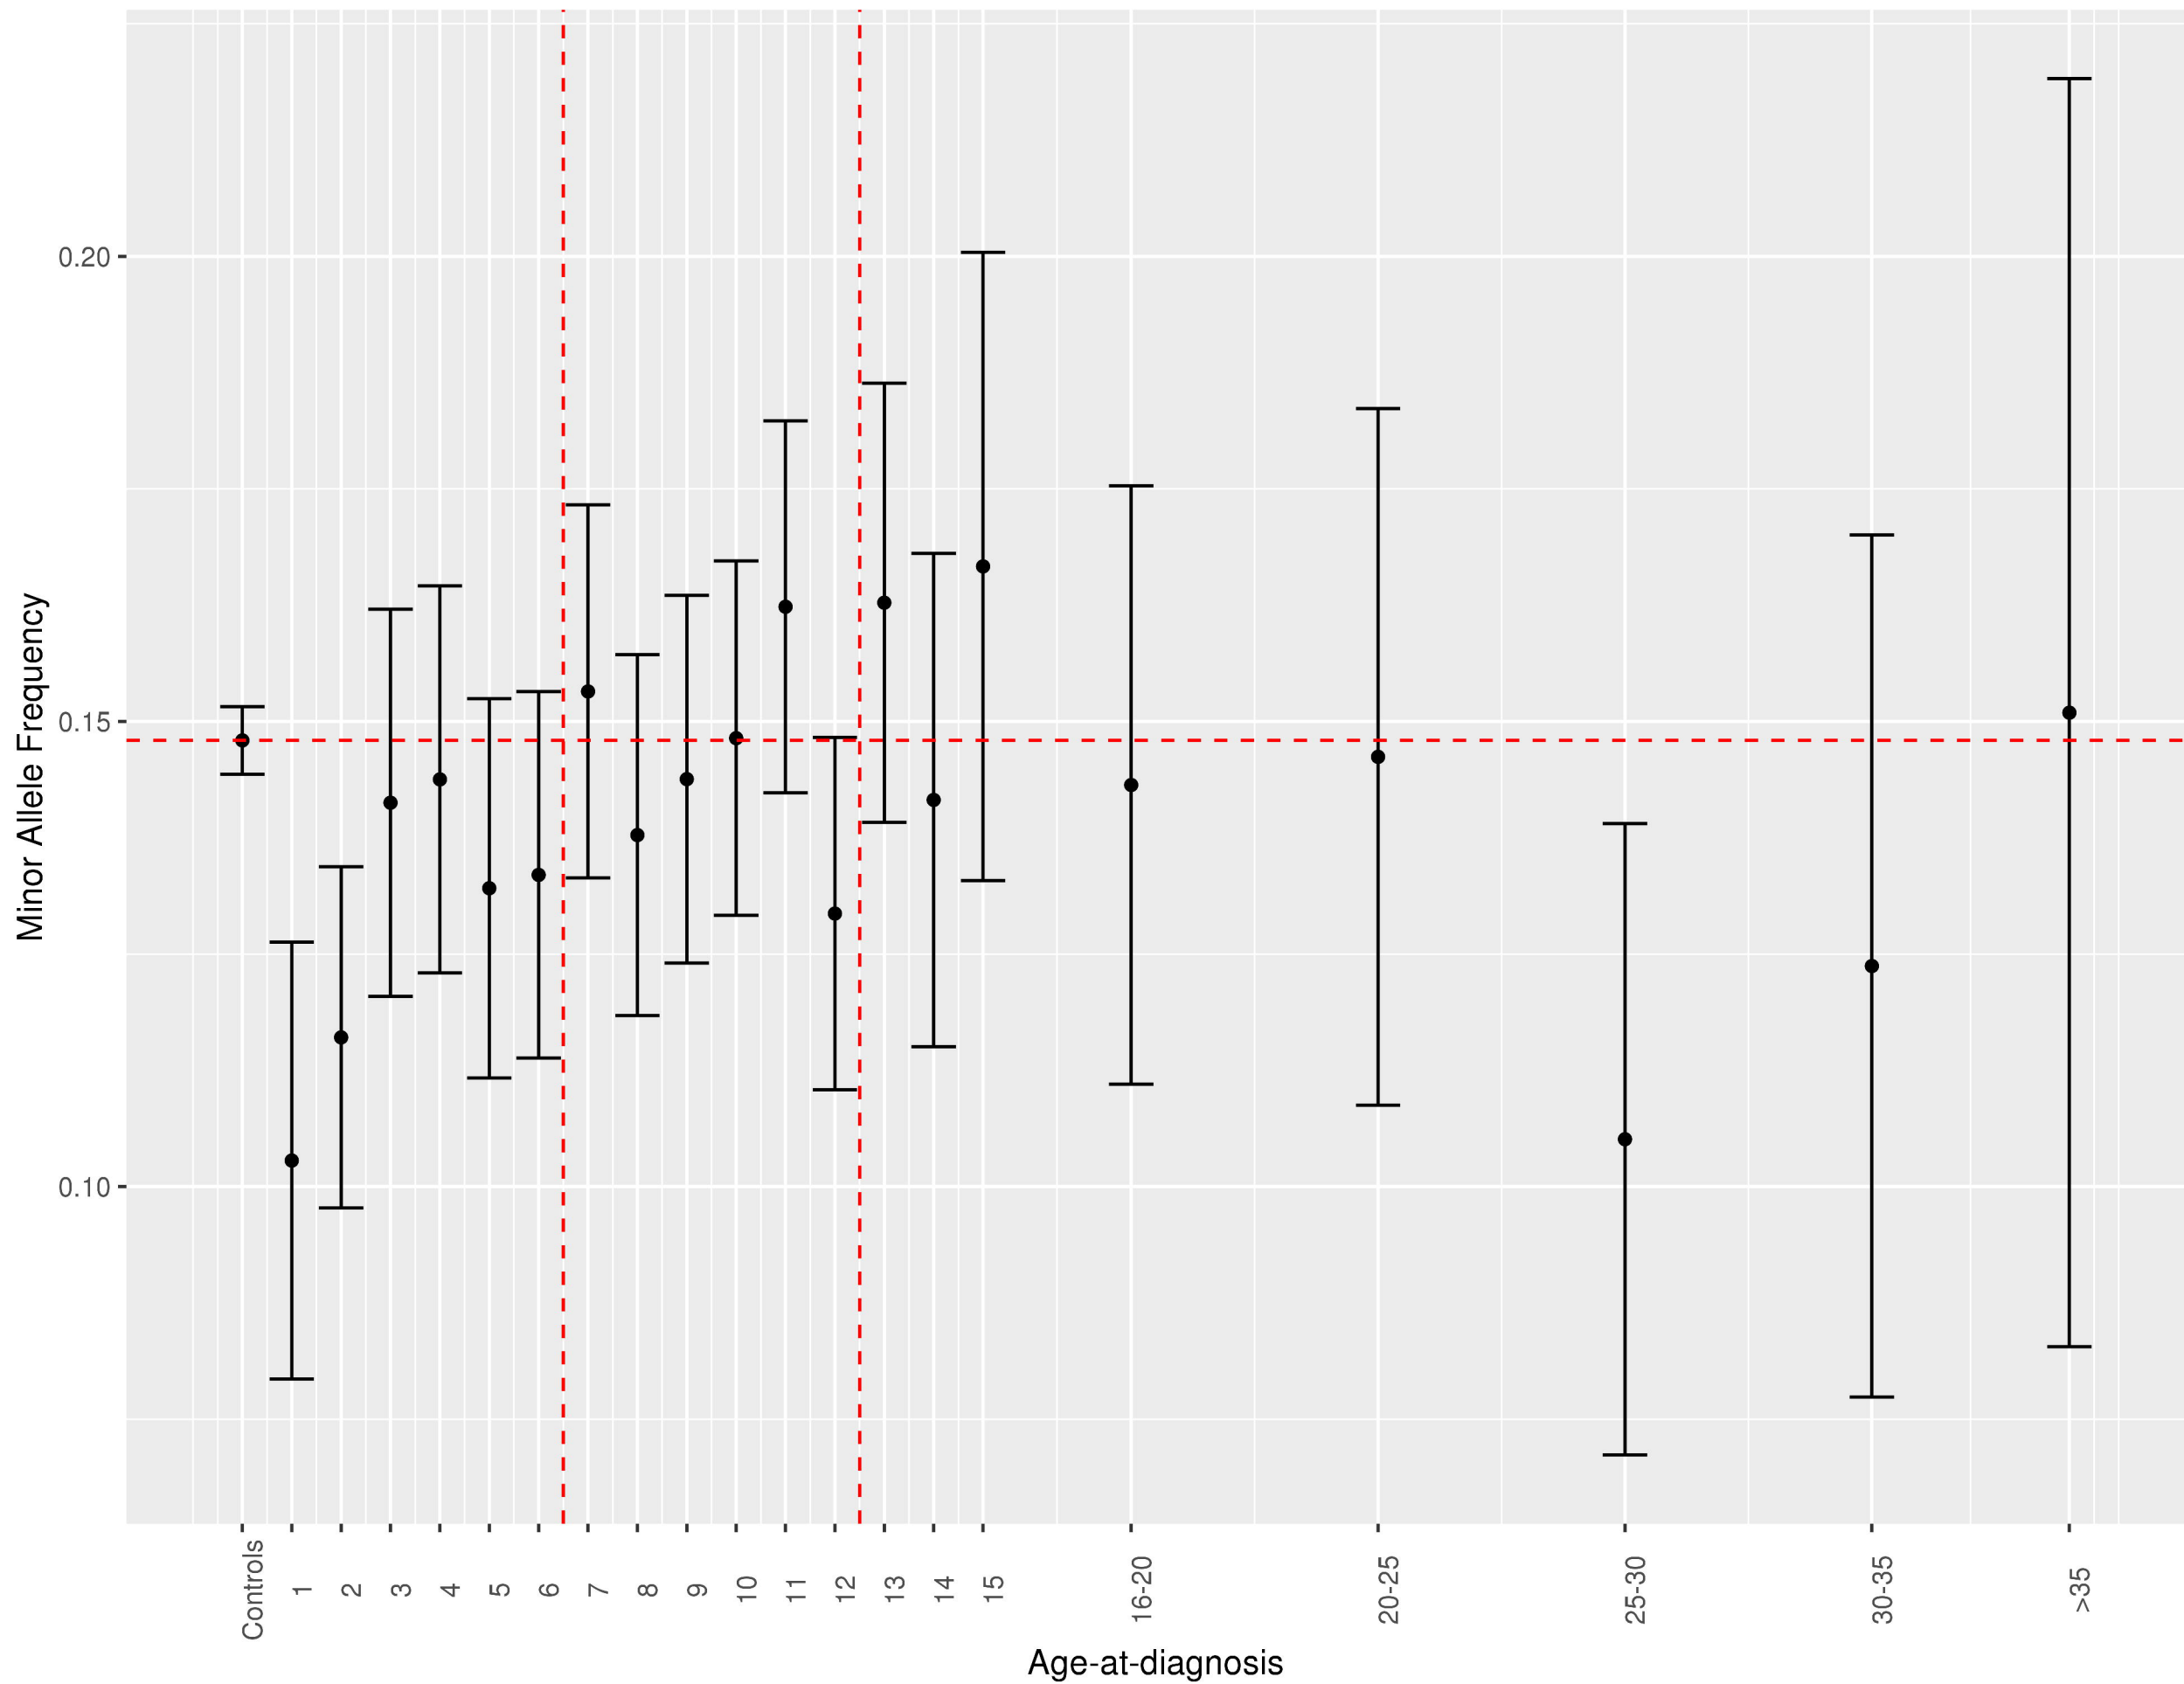

Source: https://www.biorxiv.org/content/10.1101/577304v1.full.pdf
