# Supplementary material for: Specific type 1 diabetes risk genes underpin age-at-diagnosis and indicate joint defects in immunity, beta-cell fragility and responses to viral infections in early-onset disease
Source: bioRxiv or medRxiv preprint supplement (doi:10.1101/577304), 2019-04-18
Supplement: Supplementary file [file media-1.pdf]

## **Supplementary Methods**

### **Study populations**

The individuals were recruited into various collections, UK-based individuals from the type 1 diabetes genetics consortium (T1DGC) <sup>1</sup>, the genetic resource investigating diabetes (GRID), the Warren cohort <sup>2</sup>, the northern Irish GRID <sup>3</sup>, the 1958 birth control cohort and the UK blood service <sup>1</sup>, individuals from central Europe, Asia-Pacific and the USA from the T1DGC and individuals from Finland from the IDDMGEN and T1DGEN cohorts <sup>4</sup>.

We grouped the individuals into three groups, individuals from the UK, individuals from Finland and individuals recruited into the T1DGC study. From each group, we removed individuals related to closer than second degree by pruning variants correlated to  $r^2 > 0.2$  and removing the major histocompatibility (MHC) region. We then calculated relatedness using the KING 2.0.9 software <sup>5</sup>, leaving the total of 26,991 individuals for analysis. After removing variants in linkage disequilibrium (LD) and the MHC region (chromosome 6, positions 25000000-35000000 genome build 36), 29,101 variants were used for relationship inference in the UK group, 28,597 in the T1DGC group and 26,809 in the Finnish group.

### **Genotyping**

All samples were genotyped using the Illumina ImmunoChip<sup>1</sup>, a specialised platform which densely genotypes regions of interest for autoimmune diseases.

### **Imputation**

To impute the classical HLA alleles of individuals on our dataset, HiBag <sup>6</sup> R Bioconductor package was used with the classifiers as calculated from the training dataset in the original publication used. Alleles called with a probability of less than 0.5 were treated as missing.

Nine non-HLA variants that we wanted to examine failed genotype quality control (QC) from direct genotyping using the ImmunoChip; either for having a minor allele frequency  $<0.01$ , a Hardy-Weinberg equilibrium exact test p value  $<5 \times 10^{-4}$  or  $\geq 5\%$  missing values. In these instances, we imputed the variants using the IMPUTE2<sup>7</sup> software; with the 1000 Genomes Project data as the reference haplotypes. We used this same imputation strategy to impute around index variants for non-HLA regions found to be differentially associated between the  $<7$  and  $\geq 13$  groups for fine mapping.

### **Heterogeneity tests**

In order to examine heterogeneity in effect size between the  $<7$  and  $\geq 13$  groups, we fitted two multinomial logistic regression models including all individuals from the three AAD groups and controls in both models, assessing the probability of being in each AAD group relative to controls. In the first model, we fitted the multinomial logistic regression with no constraints, adjusting for the top ten largest genetic principal components and the examined variant, where a different effect size for the disease-associated genetic variant was estimated in the  $<7$ , 7-13 and  $\geq 13$  groups. In the second model, as suggested in <sup>8</sup>, we constrained the effect size of the genetic variant in the  $<7$  and  $\geq 13$  groups to be equal to each other. If the unconstrained model fitted the data significantly better than the constrained model, this would suggest there are differences in effect sizes for the genetic variant between the two groups. We tested for heterogeneity between the  $<7$  and  $\geq 13$  groups using a likelihood ratio test comparing these two models. This analysis was performed using the multinomRob R package <sup>9</sup>.

For HLA analyses, we additionally adjusted for other HLA haplotypes/alleles to account for the high levels of LD in the region. When examining the HLA class II haplotype effects other than DR3-DQ2/DR4-DQ8, we examined only individuals

without the DR3-DQ2/DR4-DQ8 haplotype in order to remove any confounding effects of this diplotype. Supplementary Table 1 shows which individuals were included in each analysis, as well as the classical haplotypes/alleles adjusted for, with some rare haplotypes/classical alleles not adjusted for in models due to failure of the logistic regression algorithm to converge when these were included.

The top 10 genetic principal components were adjusted for in each analysis and were generated using ImmunoChip data filtered so that a set of independent variants ( $r^2 < 0.2$ ) were kept and the MHC region was excluded entirely (chromosome 6, positions 25000000-35000000 genome build 36), leaving a total of 25,745 variants for which to calculate principal components from. The PLINK software was used to carry out this procedure <sup>10</sup>.

The false discovery rate (FDR) applied throughout is the Benjamini-Hochberg FDR procedure <sup>11</sup>.

### **Binomial test examining variants not associated to FDR <0.1**

Given there are 3 AAD groups in our analysis, there are 6 possible ways the log-odds ratio estimates could be ordered. If there were to be no differences in genetic effect between AAD groups, we would expect approximately one sixth of the variants tested to be in each of the possible orders. We therefore performed a binomial test comparing the number of times the ordering was the largest effect estimate in the <7s, the intermediate effect estimate in the 7-13s and the smallest effect estimate in the  $\geq 13$ s to that expected by chance ( $1/6=0.167$ ).

### **Fine-mapping**

At regions selected for fine mapping due to their heterogeneity in effect sizes between the <7 and  $\geq 13$  group, we implemented GUESSFM <sup>12</sup>. We imputed a 0.5 Mb region around each index variant, then to guard against identifying false positive associations

due to imputation, we removed variants from the stochastic search that had a certainty call rate of <75%, a minor allele frequency of <0.005, an absolute Hardy-Weinberg equilibrium z score of >8 (in controls only) and a variant imputation information score of <0.8 or a difference in imputation information score between cases and controls of more than 0.01. We also excluded variants with a concordance rate between genotypes and imputed genotype call of <0.8 and variants where the ratio of the variance compared to the approximate expected variance for a variant with that minor allele frequency (MAF) ( $\approx 2 \times \text{MAF} \times (1 - \text{MAF})$ ) was greater than 0.05. We adjusted for the top five principal components, set the prior mean number of expected causal variants in the region to be three and saved the top 10,000 most visited models for downstream analysis.

### **Colocalisation analyses**

Using the imputed genotype data as described above, we tested each imputed variant that passed imputation QC for an association with type 1 diabetes diagnosed at <7 years compared to controls using logistic regression. We then took association summary statistics for these variants from an eQTL analysis in whole blood of over 30,000 individuals<sup>13</sup>. Summary statistics from both association studies (disease risk and eQTL) were converted to approximate Bayes Factors (ABFs). Posterior probabilities were then calculated for each of the following scenarios: i) association with disease only, ii) association with eQTL only, iii) association with disease and eQTL but distinct signals or iv) shared disease and eQTL signal in the region<sup>14</sup>. We focus on scenario iv), colocalisation of disease and eQTL signal, which is calculated by multiplying the ABFs for disease and eQTL together for each variant (to get the likelihood of colocalisation) and multiplying this by the prior probability of colocalisation, which we took to be the product of the prior probability of association

of each variant for disease and eQTL, set at 0.001, meaning the prior probability for colocalisation was 0.000001. Dividing this product by the normalising factor, the overall probability of all combinations of each of the four hypotheses and also the probability of no association with disease or eQTL, gives the posterior probability of colocalisation. The coloc R package was used to carry out this analysis.

**Supplementary Table 1:** Classical HLA alleles/haplotypes examined in analysis.

| Haplotype/allele name | Haplotype/allele definition                                                                                                                                                                                                                                                                                                                                                         | Individuals included | Conditioned on                                              | Enough individuals to include? |
|-----------------------|-------------------------------------------------------------------------------------------------------------------------------------------------------------------------------------------------------------------------------------------------------------------------------------------------------------------------------------------------------------------------------------|----------------------|-------------------------------------------------------------|--------------------------------|
| DR3-DQ2               | DRB1*03:01-DQB1*02:01                                                                                                                                                                                                                                                                                                                                                               | Non-DR3/4 only       | A*02:01, A*24:02, B*39:06                                   | Yes                            |
| DR4-DQ8               | DRB1*04:01-DQB1*03:02<br>DRB1*04:02-DQB1*03:02<br>DRB1*04:04-DQB1*03:02<br>DRB1*04:05-DQB1*03:02<br>DRB1*04:08-DQB1*03:02<br>DRB1*04:01-DQB1*03:04<br>DRB1*04:02-DQB1*03:04<br>DRB1*04:04-DQB1*03:04<br>DRB1*04:05-DQB1*03:04<br>DRB1*04:08-DQB1*03:04<br>DRB1*04:01-DQB1*02:02<br>DRB1*04:02-DQB1*02:02<br>DRB1*04:04-DQB1*02:02<br>DRB1*04:05-DQB1*02:02<br>DRB1*04:08-DQB1*02:02 | Non-DR3/4 only       | A*02:01, A*24:02, B*39:06                                   | Yes                            |
| DR3-DQ2/DR4-DQ8       | Any combination of rows 1 and 2 above, one on either chromosome.                                                                                                                                                                                                                                                                                                                    | All individuals      | A*02:01, A*24:02, B*39:06                                   | Yes                            |
| DRB1*13:03-DQB1*03:01 | DRB1*13:03-DQB1*03:01                                                                                                                                                                                                                                                                                                                                                               | Non-DR3/4 only       |                                                             | No                             |
| DRB1*11:04-DQB1*03:01 | DRB1*11:04-DQB1*03:01                                                                                                                                                                                                                                                                                                                                                               | Non-DR3/4 only       |                                                             | No                             |
| DRB1*15:01-DQB1*06:02 | DRB1*15:01-DQB1*06:02                                                                                                                                                                                                                                                                                                                                                               | Non-DR3/4 only       |                                                             | Yes                            |
| DRB1*07:01-DQB1*03:03 | DRB1*07:01-DQB1*03:03                                                                                                                                                                                                                                                                                                                                                               | Non-DR3/4 only       |                                                             | Yes                            |
| DRB1*14:01-DQB1*05:03 | DRB1*14:01-DQB1*05:03                                                                                                                                                                                                                                                                                                                                                               | Non-DR3/4 only       |                                                             | No                             |
| A*02:01               | A*02:01                                                                                                                                                                                                                                                                                                                                                                             | All individuals      | DR3-DQ2, DR4-DQ8, DR3-DQ2/DR4-DQ8, B*39:06                  | Yes                            |
| A*24:02               | A*24:02                                                                                                                                                                                                                                                                                                                                                                             | All individuals      | DR3-DQ2, DR4-DQ8, DR3-DQ2/DR4-DQ8, B*39:06                  | Yes                            |
| A*11:01               | A*11:01                                                                                                                                                                                                                                                                                                                                                                             | All individuals      | DR3-DQ2, DR4-DQ8, DR3-DQ2/DR4-DQ8, B*39:06                  | Yes                            |
| A*32:01               | A*32:01                                                                                                                                                                                                                                                                                                                                                                             | All individuals      | DR3-DQ2, DR4-DQ8, DR3-DQ2/DR4-DQ8, B*39:06                  | Yes                            |
| DPB1*03:01            | DPB1*03:01                                                                                                                                                                                                                                                                                                                                                                          | All individuals      | DR3-DQ2, DR4-DQ8, DR3-DQ2/DR4-DQ8, A*02:01, A24*02, B*39:06 | Yes                            |
| DPB1*04:02            | DPB1*04:02                                                                                                                                                                                                                                                                                                                                                                          | All individuals      | DR3-DQ2, DR4-DQ8, DR3-DQ2/DR4-DQ8, A*02:01, A24*02, B*39:06 | Yes                            |
| B*18:01               | B*18:01                                                                                                                                                                                                                                                                                                                                                                             | All individuals      | DR3-DQ2, DR4-DQ8, DR3-DQ2/DR4-DQ8, A*02:01, A24*02          | Yes                            |
| B*39:06               | B*39:06                                                                                                                                                                                                                                                                                                                                                                             | All individuals      | DR3-DQ2, DR4-DQ8, DR3-DQ2/DR4-DQ8, A*02:01, A24*02          | Yes                            |
| B*44:03               | B*44:03                                                                                                                                                                                                                                                                                                                                                                             | All individuals      | DR3-DQ2, DR4-DQ8, DR3-DQ2/DR4-DQ8, A*02:01, A24*02          | Yes                            |

**Supplementary Table 2:** Non-HLA variants examined in analysis.

| Variant name | Chr | Position (genome build 37) | Publication(s) where association identified* | Locus name in Figures in this manuscript |
|--------------|-----|----------------------------|----------------------------------------------|------------------------------------------|
| rs2476601    | 1   | 114377568                  | Onengut-Gumuscu                              | <i>PTPN22</i>                            |
| rs78037977   | 1   | 172681031                  | Fortune                                      | <i>TNFSF4**</i>                          |
| rs6691977    | 1   | 200814959                  | Onengut-Gumuscu                              | <i>CAMSAP2</i>                           |
| rs3024505    | 1   | 206939904                  | Onengut-Gumuscu                              | <i>IL10</i>                              |
| rs4849135    | 1   | 111615079                  | Onengut-Gumuscu                              | <i>ACOXL</i>                             |
| rs13415583   | 2   | 100764087                  | Onengut-Gumuscu                              | <i>AFF3</i>                              |
| rs2111485    | 2   | 163110536                  | Onengut-Gumuscu                              | <i>IFIH1 (1)</i>                         |
| rs35667974   | 2   | 163124637                  | Onengut-Gumuscu                              | <i>IFIH1 (2)</i>                         |
| rs72871627   | 2   | 163136942                  | Onengut-Gumuscu                              | <i>IFIH1 (3)</i>                         |
| rs3087243    | 2   | 204738919                  | Onengut-Gumuscu                              | <i>CTLA4</i>                             |
| rs113010081  | 3   | 46457412                   | Onengut-Gumuscu                              | <i>CCR5</i>                              |
| rs6819058    | 4   | 123114622                  | Onengut-Gumuscu/<br>Burren                   | <i>IL2/IL21 (1)</i>                      |
| rs67797421   | 4   | 123116177                  | Onengut-Gumuscu/<br>Burren                   | <i>IL2/IL21 (2)</i>                      |
| rs2611215    | 4   | 166574267                  | Onengut-Gumuscu                              | <i>CPE</i>                               |
| rs11954020   | 5   | 35883251                   | Onengut-Gumuscu                              | <i>IL7R</i>                              |
| rs72975913   | 6   | 128293932                  | Inshaw                                       | <i>PTPRK/THEMIS</i>                      |
| rs72928038   | 6   | 90976768                   | Onengut-Gumuscu                              | <i>BACH2</i>                             |
| rs1538171    | 6   | 126752884                  | Onengut-Gumuscu                              | <i>CENPW</i>                             |
| rs62447205   | 7   | 50465830                   | Onengut-Gumuscu                              | <i>IKZF1</i>                             |
| rs10277986   | 7   | 51028987                   | Onengut-Gumuscu                              | <i>COBL</i>                              |
| rs6476839    | 9   | 4290823                    | Onengut-Gumuscu                              | <i>GLIS3</i>                             |
| rs61839660   | 10  | 6094697                    | Onengut-Gumuscu,<br>Wallace                  | <i>IL2RA (1)</i>                         |
| rs11594656   | 10  | 6122009                    | Onengut-Gumuscu,<br>Wallace                  | <i>IL2RA (2)</i>                         |
| rs6602437    | 10  | 6130077                    | Onengut-Gumuscu,<br>Wallace                  | <i>IL2RA (3)</i>                         |
| rs41295121   | 10  | 6129643                    | Onengut-Gumuscu,<br>Wallace                  | <i>IL2RA (4)</i>                         |
| rs12416116   | 10  | 90035654                   | Onengut-Gumuscu                              | <i>PTEN</i>                              |
| rs689        | 11  | 2182224                    | Onengut-Gumuscu                              | <i>INS (1)</i>                           |
| rs72853903   | 11  | 2198665                    | Onengut-Gumuscu                              | <i>INS (2)</i>                           |
| rs917911     | 12  | 9905851                    | Onengut-Gumuscu                              | <i>CD69</i>                              |
| rs705705     | 12  | 56435504                   | Onengut-Gumuscu                              | <i>IKZF4</i>                             |
| rs653178     | 12  | 112007756                  | Onengut-Gumuscu                              | <i>SH2B3</i>                             |
| rs9585056    | 13  | 100081766                  | Onengut-Gumuscu                              | <i>GPR183</i>                            |
| rs1456988    | 14  | 98488007                   | Onengut-Gumuscu                              | <i>LINC01550</i>                         |
| rs56994090   | 14  | 101306447                  | Onengut-Gumuscu                              | <i>MEG3</i>                              |
| rs72727394   | 15  | 38847022                   | Onengut-Gumuscu                              | <i>RASGRP1</i>                           |
| rs34593439   | 15  | 79234957                   | Onengut-Gumuscu                              | <i>CTSH</i>                              |
| rs151234     | 16  | 28505660                   | Onengut-Gumuscu                              | <i>IL27</i>                              |
| rs12927355   | 16  | 11194771                   | Onengut-Gumuscu                              | <i>DEXI (1)</i>                          |
| rs193778     | 16  | 11351211                   | Onengut-Gumuscu                              | <i>DEXI (2)</i>                          |
| rs8056814    | 16  | 75252327                   | Onengut-Gumuscu                              | <i>CTRB1**</i>                           |
| rs12453507   | 17  | 38053207                   | Onengut-Gumuscu                              | <i>IKZF3</i>                             |
| rs757411     | 17  | 38775150                   | Onengut-Gumuscu                              | <i>CCR7</i>                              |

|            |    |          |                 |                  |
|------------|----|----------|-----------------|------------------|
| rs1052553  | 17 | 44073889 | Onengut-Gumuscu | <i>MAPT</i>      |
| rs1893217  | 18 | 12809340 | Onengut-Gumuscu | <i>PTPN2 (1)</i> |
| rs12971201 | 18 | 12830538 | Onengut-Gumuscu | <i>PTPN2 (2)</i> |
| rs1615504  | 18 | 67526644 | Onengut-Gumuscu | <i>CD226</i>     |
| rs34536443 | 19 | 10463118 | Onengut-Gumuscu | <i>TYK2 (1)</i>  |
| rs12720356 | 19 | 10469975 | Onengut-Gumuscu | <i>TYK2 (2)</i>  |
| rs402072   | 19 | 47219122 | Onengut-Gumuscu | <i>PRKD2</i>     |
| rs516246   | 19 | 49206172 | Onengut-Gumuscu | <i>FUT2</i>      |
| rs6043409  | 20 | 1616206  | Onengut-Gumuscu | <i>SIRPG</i>     |
| rs11203202 | 21 | 43825357 | Onengut-Gumuscu | <i>UBASH3A</i>   |
| rs6518350  | 21 | 45621817 | Onengut-Gumuscu | <i>ICOSLG</i>    |
| rs4820830  | 22 | 30531091 | Onengut-Gumuscu | <i>HORMAD2</i>   |
| rs229533   | 22 | 37587111 | Onengut-Gumuscu | <i>CIQTNF6</i>   |

\*Most recent publication listed. Onengut-Gumuscu <sup>1</sup>, Fortune <sup>15</sup>, Burren <sup>16</sup>, Inshaw <sup>3</sup>, Wallace <sup>12</sup>.

\*\*Candidate gene different from previous reports based on publically available gene expression (<https://dice-database.org/>) and promoter-capture Hi-C data (<https://www.chicp.org>).



**Supplementary Table 3:** Non-HLA region variants with evidence of heterogeneity in effect size between the <7 and ≥13 groups: Promoter Capture Hi-C (PCHi-C) candidate genes.

| <b>Locus name/<br/>karyotype band</b> | <b>Tag/index<br/>variant</b> | <b>Candidate<br/>causal genes</b>             | <b>PCHi-C prioritised<br/>protein coding<br/>genes*</b>                                                                | <b>PCHi-C prioritised<br/>non-protein coding<br/>transcripts</b> |
|---------------------------------------|------------------------------|-----------------------------------------------|------------------------------------------------------------------------------------------------------------------------|------------------------------------------------------------------|
| <i>IKZF3</i> /<br>17q21               | rs12453507                   | <i>IKZF3</i><br><i>ORMDL3</i><br><i>GSDMB</i> | <i>ORMDL3</i><br><i>GSDMB</i><br><i>ZBP2</i>                                                                           | -                                                                |
| <i>CTSH</i> /<br>15q25.1              | rs34593439                   | <i>CTSH</i>                                   | <i>CTSH</i><br><i>BCL2A1</i>                                                                                           | -                                                                |
| <i>GLIS3</i> /<br>9p24.2              | rs6476839                    | <i>GLIS3</i>                                  | <i>GLIS3</i> **                                                                                                        | <i>GLIS3-ASI</i> **                                              |
| <i>IL2RA</i> (3) /<br>10p15.1         | rs6602437                    | <i>IL2RA</i>                                  | <i>RBM17</i><br><i>IL2RA</i><br><i>GDI2</i><br><i>PRKCQ</i><br><i>ANKRD16</i><br><i>FAM208B</i><br><i>FBX018</i>       | <i>RP11-536K7.3</i><br><i>PRKCQ-ASI</i>                          |
| <i>IL10</i> /<br>1q32.1               | rs3024505                    | <i>IL10</i><br><i>FAIM3</i>                   | <i>IL10</i><br><i>FCAMR</i><br><i>IL20</i><br><i>FAIM3</i><br><i>PIGR</i><br><i>CD55</i><br><i>IL24</i><br><i>IL19</i> | -                                                                |
| <i>PTPRK/THEMIS</i> /<br>6q22.33      | rs72975913                   | <i>PTPRK</i><br><i>THEMIS</i>                 | <i>PTPRK</i><br><i>THEMIS</i>                                                                                          |                                                                  |
| <i>SIRPG</i> /<br>20p13               | rs6043409                    | <i>SIRPG</i><br><i>SIRPG-ASI</i>              | -                                                                                                                      |                                                                  |

\*Inshaw et. al <sup>17</sup>

\*\* Miguel-Escalada et al. <sup>18</sup>

**Supplementary Table 4:** Details of non-HLA variants with evidence of heterogeneity in effect size between the <7 and ≥13 groups.

| Locus name/<br>karyotype band | Tag/index<br>variant | Candidate<br>causal genes                     | Tissues<br>expressed*                                                                                              | BLUEPRINT <sup>19</sup> / DICE** database<br>immune cell types expressed***                                                                                                               | Function                                                                                                                                                                                                                                                                                                                                                                                                                                                                                                                                                                                                                                                                                                                                                                                                                                                                                                                                                                         |
|-------------------------------|----------------------|-----------------------------------------------|--------------------------------------------------------------------------------------------------------------------|-------------------------------------------------------------------------------------------------------------------------------------------------------------------------------------------|----------------------------------------------------------------------------------------------------------------------------------------------------------------------------------------------------------------------------------------------------------------------------------------------------------------------------------------------------------------------------------------------------------------------------------------------------------------------------------------------------------------------------------------------------------------------------------------------------------------------------------------------------------------------------------------------------------------------------------------------------------------------------------------------------------------------------------------------------------------------------------------------------------------------------------------------------------------------------------|
| <i>IKZF3</i> /<br>17q21       | rs12453507           | <i>IKZF3</i><br><i>ORMDL3</i><br><i>GSDMB</i> | <i>IKZF3</i> : Small<br>intestine, spleen<br><br><i>ORMDL3</i> :<br>Ubiquitous<br><br><i>GSDMB</i> :<br>Ubiquitous | <i>IKZF3</i> : thymocytes, B, T and NK<br>cells<br><br><i>ORMDL3</i> : thymocytes, T, B, and NK<br>cells, eosinophils<br><br><i>GSDMB</i> : thymocytes, T, B and NK<br>cells, eosinophils | <i>IKZF3 (Ailos)</i> : A transcriptional regulator and a<br>member of the Ikaros gene family <sup>20</sup> . <i>IKZF3</i><br>regulates B cell activation thresholds and<br>differentiation <sup>21</sup> and is required for generation of<br>high affinity plasma cells <sup>22</sup> .<br>In T cells, <i>IKZF3</i> acts as a transcriptional repressor<br>to promote Th17 differentiation <sup>23</sup> and can<br>modulate the activity of FoxP3 <sup>24</sup> .<br><br><i>ORMDL3</i> : regulates sphingolipid biosynthesis and<br>expression is increased by inflammatory stimuli <sup>25</sup> .<br><i>ORMDL3</i> is a negative regulator of store operated<br>calcium entry <sup>26</sup> and modulates lymphocyte<br>activation and cytokine production <sup>27</sup> .<br><br><i>GSDMB</i> : <i>GSDMB</i> can be cleaved by apoptotic<br>caspases <sup>28</sup> and the active form of <i>GSDMB</i> induces<br>pyroptotic cell death in epithelial cells <sup>29</sup> . |
| <i>CTSH</i> /<br>15q25.1      | rs34593439           | <i>CTSH</i>                                   | Ubiquitous                                                                                                         | Macrophages, DCs, T and B cells,<br>monocytes                                                                                                                                             | <i>CTSH</i> has amino- and endopeptidase activity <sup>30</sup> and<br>has been reported to process pro-surfactant protein<br>B <sup>31</sup> and pro-granzyme B <sup>32</sup> into their active mature<br>forms.<br>Proteolytic cleavage of TLR3 by <i>CTSH</i> alters the<br>stability, localization and/or the regulation of TLR3<br>activity <sup>33,34</sup> . <i>CTSH</i> -<br>deficient mice have reduced TLR3 expression and<br>type 1 IFN release in response to poly(I:C)<br>stimulation <sup>35</sup> and T1D associated SNPs colocalise<br>with a monocyte eQTL signal <sup>36</sup> .                                                                                                                                                                                                                                                                                                                                                                               |

|                               |            |                               |                                                                              |                                                                                                      |                                                                                                                                                                                                                                                                                                                                                                                                                                                                                                                                                                                                                                                                                                                                                       |
|-------------------------------|------------|-------------------------------|------------------------------------------------------------------------------|------------------------------------------------------------------------------------------------------|-------------------------------------------------------------------------------------------------------------------------------------------------------------------------------------------------------------------------------------------------------------------------------------------------------------------------------------------------------------------------------------------------------------------------------------------------------------------------------------------------------------------------------------------------------------------------------------------------------------------------------------------------------------------------------------------------------------------------------------------------------|
| <i>GLIS3</i> / 9p24.2         | rs6476839  | <i>GLIS3</i>                  | Pancreas, thyroid gland, kidney, ovary                                       | -                                                                                                    | <i>GLIS3</i> is a transcriptional regulator <sup>37</sup> , required for insulin expression <sup>38</sup> , function and transcriptional program of mature beta cells <sup>39</sup> . A key molecule regulating the response to unfolded protein stress and protection of beta cells from apoptosis <sup>40, 39</sup> .                                                                                                                                                                                                                                                                                                                                                                                                                               |
| <i>IL2RA</i> (3) / 10p15.1    | rs6602437  | <i>IL2RA</i>                  | Bone marrow, Lymph nodes, spleen                                             | Thymocytes, T, B, NK                                                                                 | <i>IL2RA</i> encodes CD25 the alpha chain of the trimeric high affinity IL-2 receptor. IL-2 signaling controls T cell growth and differentiation, NK cell and activated B cell proliferation and is essential for the survival and function of regulatory T cells (Tregs) <sup>41, 42</sup>                                                                                                                                                                                                                                                                                                                                                                                                                                                           |
| <i>IL10</i> / 1q32.1          | rs3024505  | <i>IL10</i><br><i>FAIM3</i>   | <i>IL10</i> : Spleen<br><i>FAIM3</i> : Spleen, small intestine               | <i>IL10</i> : Monocytes, activated T, Treg, macrophages and B cells.<br><i>FAIM3</i> : T and B cells | <i>IL10</i> : Interleukin 10 is a key cytokine that modulates immune and non-immune cell function <sup>43</sup> . IL10 can be produced by specialized regulatory T <sup>44</sup> and B cell populations <sup>45</sup> . Primary mechanisms include downregulation of MHC class II and cytokine responses of antigen-presenting cells <sup>46</sup> and induction of anergy in T cells <sup>47</sup> . IL10 acts as a potent growth and differentiation factor for B cells <sup>48</sup> .<br><i>FAIM3</i> : Encodes FCmR a receptor for natural IgM <sup>49</sup> and involved in B cell homeostasis <sup>50</sup> , control of IL10 production <sup>51</sup> and supports early B cell activation events and plasma cell development <sup>52</sup> . |
| <i>PTPRK/THEMIS</i> / 6q22.33 | rs72975913 | <i>PTPRK</i><br><i>THEMIS</i> | <i>PTPRK</i> : Ubiquitous<br><i>THEMIS</i> : Spleen, small intestine, thymus | <i>PTPRK</i> : Thymocytes, naïve T cells, B cells<br><i>THEMIS</i> : T cells                         | <i>PTPRK</i> : Protein tyrosine phosphatase receptor type kappa may be involved in thymic selection of single positive CD4 T cells <sup>53</sup> .<br><i>THEMIS</i> : Thymocyte-expressed molecule involved in selection regulates phosphatase activity (Shp1) in developing thymocytes to enable positive selection <sup>54, 55</sup> .                                                                                                                                                                                                                                                                                                                                                                                                              |
| <i>SIRPG</i> /                | rs6043409  | <i>SIRPG</i>                  | <i>SIRPG</i> : Spleen,                                                       | <i>SIRPG</i> : T cell                                                                                | <i>SIRPG</i> : Signaling receptor protein gamma binds to                                                                                                                                                                                                                                                                                                                                                                                                                                                                                                                                                                                                                                                                                              |

|       |  |                  |                         |                           |                                                                                                                                                                                                                                                                                                                                                      |
|-------|--|------------------|-------------------------|---------------------------|------------------------------------------------------------------------------------------------------------------------------------------------------------------------------------------------------------------------------------------------------------------------------------------------------------------------------------------------------|
| 20p13 |  | <i>SIRPG-ASI</i> | small intestine, testis | <i>SIRPG-ASI</i> : T cell | CD47 <sup>56</sup> , a ubiquitously expressed integrin associated protein. Interaction of SIRPG with CD47 controls transendothelial migration of T cells <sup>57</sup> . The T1D associated variant rs2281808 reduces expression of SIRPG in T cells and modulates the activation threshold and differentiation state of CD8 T cells <sup>58</sup> . |
|-------|--|------------------|-------------------------|---------------------------|------------------------------------------------------------------------------------------------------------------------------------------------------------------------------------------------------------------------------------------------------------------------------------------------------------------------------------------------------|

\*Human protein atlas: <https://www.proteinatlas.org>

\*\* DICE database: <https://dice-database.org/>

\*\*\* T=T cells, B= B cells, NK = Natural Killer cells, DC= Dendritic cells.

**INCLUDE:**

- (i) candidate genes nominated in Onengut-Gumuscu et al<sup>1</sup> and Inshaw et al<sup>17</sup>.
- (ii) genes prioritised by promoter capture Hi-C (PChi-C) in immune cells<sup>17, 59</sup>, or gene promoter interactions with credible SNPs in islet PChi-C<sup>18</sup>.

**FILTER ON:**

- (i) expression in immune cells (<https://dice-database.org/>) or islets<sup>60</sup>

**and/or**

- (ii) eQTL in whole blood<sup>13</sup> passing a Bonferroni corrected p value threshold ( $p < 2.78 \times 10^{-13}$ ).

**Supplementary Table 5:** Most likely variants causally associated with T1D at the *IKZF3* locus from GUESSFM fine mapping analysis.

| Variant     | Position (gr37) | Log-odds ratio | Reference allele | Effect allele | Variant posterior probability | Group posterior probability |
|-------------|-----------------|----------------|------------------|---------------|-------------------------------|-----------------------------|
| rs1008723   | 38066267        | -0.1729        | T                | G             | 3.55e-02                      | 0.9557                      |
| rs1011082   | 38068514        | -0.1664        | T                | C             | 1.02e-02                      | 0.9557                      |
| rs1031458   | 38072173        | -0.1661        | G                | T             | 9.82e-03                      | 0.9557                      |
| rs1031460   | 38072247        | -0.1691        | T                | G             | 1.75e-02                      | 0.9557                      |
| rs12453507  | 38053207        | -0.1688        | G                | C             | 1.65e-02                      | 0.9557                      |
| rs12603332  | 38082807        | -0.1627        | T                | C             | 5.51e-03                      | 0.9557                      |
| rs12950209  | 38049102        | -0.1774        | C                | T             | 8.33e-02                      | 0.9557                      |
| rs12950743  | 38049233        | -0.179         | C                | T             | 1.10e-01                      | 0.9557                      |
| rs141758348 | 38069364        | -0.1476        | TCAAAA           | T             | 6.60e-04                      | 0.9557                      |
| rs143385463 | 38071855        | -0.1629        | ATTT             | A             | 5.78e-03                      | 0.9557                      |
| rs150597688 | 38071086        | -0.1653        | C                | CTT           | 7.76e-03                      | 0.9557                      |
| rs2290400   | 38066240        | -0.1767        | C                | T             | 7.43e-02                      | 0.9557                      |
| rs2305479   | 38062217        | -0.1731        | T                | C             | 3.74e-02                      | 0.9557                      |
| rs2872516   | 38072727        | -0.1422        | C                | T             | 1.75e-04                      | 0.9557                      |
| rs35196450  | 38062942        | -0.1566        | AC               | A             | 1.77e-03                      | 0.9557                      |
| rs36000226  | 38063929        | -0.1665        | C                | T             | 7.02e-03                      | 0.9557                      |
| rs36084703  | 38063980        | -0.1665        | C                | CA            | 7.10e-03                      | 0.9557                      |
| rs4065275   | 38080865        | -0.1662        | A                | G             | 1.06e-02                      | 0.9557                      |
| rs62067034  | 38063738        | -0.1668        | T                | C             | 7.44e-03                      | 0.9557                      |
| rs6503524   | 38069809        | -0.1673        | C                | T             | 1.24e-02                      | 0.9557                      |
| rs68122720  | 38050092        | -0.157         | A                | AAG           | 3.62e-03                      | 0.9557                      |
| rs7216389   | 38069949        | -0.1678        | C                | T             | 1.35e-02                      | 0.9557                      |
| rs7216558   | 38070071        | -0.1709        | C                | T             | 2.44e-02                      | 0.9557                      |
| rs7219923   | 38074518        | -0.1696        | C                | T             | 1.94e-02                      | 0.9557                      |
| rs7224129   | 38075426        | -0.1694        | G                | A             | 1.88e-02                      | 0.9557                      |
| rs7359623   | 38049589        | -0.1644        | T                | C             | 7.71e-03                      | 0.9557                      |
| rs8065777   | 38072402        | -0.1667        | C                | T             | 1.10e-02                      | 0.9557                      |
| rs8067378   | 38051348        | -0.1818        | G                | A             | 1.93e-01                      | 0.9557                      |
| rs8074437   | 38076137        | -0.1677        | T                | G             | 1.28e-02                      | 0.9557                      |
| rs869402    | 38068043        | -0.1677        | T                | C             | 1.30e-02                      | 0.9557                      |
| rs883770    | 38063381        | -0.1723        | T                | C             | 3.20e-02                      | 0.9557                      |
| rs921649    | 38069274        | -0.1669        | C                | T             | 1.16e-02                      | 0.9557                      |
| rs921650    | 38069076        | -0.1686        | G                | A             | 1.53e-02                      | 0.9557                      |
| rs9906951   | 38048244        | -0.1794        | C                | T             | 1.19e-01                      | 0.9557                      |

**Supplementary Table 6:** Most likely variants causally associated with T1D at the *CTSH* locus from GUESSFM fine mapping analysis.

| Variant    | Position (gr37) | Log-odds ratio | Reference allele | Effect allele | Variant posterior probability | Group posterior probability |
|------------|-----------------|----------------|------------------|---------------|-------------------------------|-----------------------------|
| rs12148472 | 79231478        | -0.2763        | T                | C             | 1.76e-02                      | 1                           |
| rs12592898 | 79229199        | -0.2736        | G                | A             | 9.89e-03                      | 1                           |
| rs2289702  | 79237293        | -0.3513        | C                | T             | 4.47e-01                      | 1                           |
| rs34593439 | 79234957        | -0.3342        | G                | A             | 2.42e-01                      | 1                           |
| rs34843303 | 79234470        | -0.3283        | T                | C             | 2.80e-01                      | 1                           |
| rs60254670 | 79229959        | -0.2648        | TGGCCAGAATG      | T             | 4.10e-03                      | 1                           |

**Supplementary Table 7:** Most likely variants causally associated with T1D at the *GLIS3* locus from GUESSFM fine mapping analysis.

| Variant    | Position (gr37) | Log-odds ratio | Reference allele | Effect allele | Variant posterior probability | Group posterior probability |
|------------|-----------------|----------------|------------------|---------------|-------------------------------|-----------------------------|
| rs10116772 | 4290541         | -0.129         | A                | C             | 1.43e-02                      | 0.9751                      |
| rs10758593 | 4292083         | -0.1338        | A                | G             | 2.96e-02                      | 0.9751                      |
| rs10758594 | 4295583         | -0.1421        | A                | G             | 1.26e-01                      | 0.9751                      |
| rs10814915 | 4290544         | -0.1358        | T                | C             | 4.60e-02                      | 0.9751                      |
| rs10814916 | 4293150         | -0.1371        | C                | A             | 5.94e-02                      | 0.9751                      |
| rs10814917 | 4296430         | -0.1399        | A                | G             | 9.18e-02                      | 0.9751                      |
| rs10974438 | 4291928         | -0.1439        | C                | A             | 8.95e-02                      | 0.9751                      |
| rs34706136 | 4294707         | -0.1522        | TG               | T             | 2.99e-01                      | 0.9751                      |
| rs35338539 | 4298589         | -0.1268        | A                | G             | 5.74e-03                      | 0.9751                      |
| rs4339696  | 4295880         | -0.1266        | G                | T             | 1.17e-02                      | 0.9751                      |
| rs6476839  | 4290823         | -0.1352        | T                | A             | 3.72e-02                      | 0.9751                      |
| rs6476842  | 4291268         | -0.1396        | C                | T             | 8.45e-02                      | 0.9751                      |
| rs7020673  | 4291747         | -0.1389        | G                | C             | 8.03e-02                      | 0.9751                      |

## Supplementary References

1. Onengut-Gumuscu, S. *et al.* Fine mapping of type 1 diabetes susceptibility loci and evidence for colocalization of causal variants with lymphoid gene enhancers. *Nat. Genet.* **47**, 381–6 (2015).
2. Bain, S. C., Todd, J. A. & Barnett, A. H. The British Diabetic Association - Warren Repository. *Autoimmunity* **7**, 83–85 (1990).
3. Inshaw, J. R. J., Walker, N. M., Wallace, C., Bottolo, L. & Todd, J. A. The chromosome 6q22.33 region is associated with age at diagnosis of type 1 diabetes and disease risk in those diagnosed under 5 years of age. *Diabetologia* **61**, 147–157 (2018).
4. Qiao, Q. *et al.* A genome-wide scan for type 1 diabetes susceptibility genes in nuclear families with multiple affected siblings in Finland. *BMC Genet.* **8**, (2007).
5. Manichaikul, A. *et al.* Robust relationship inference in genome-wide association studies. *Bioinformatics* **26**, 2867–2873 (2010).
6. Zheng, X. *et al.* HLA genotype imputation with attribute bagging. *Pharmacogenomics J.* **14**, 192–200 (2014).
7. Howie, B. N., Donnelly, P. & Marchini, J. A flexible and accurate genotype imputation method for the next generation of genome-wide association studies. *PLoS Genet.* **5**, (2009).
8. Morris, A. P. *et al.* A Powerful Approach to Sub-Phenotype Analysis in Population-Based Genetic Association Studies. *Genet. Epidemiol.* **34**, 335–343 (2010).
9. Mebane, W. & Sekhon, J. *Robust Estimation and Outlier Detection for Overdispersed Multinomial Models of Count Data.* (2004).
10. Chang, C. C. *et al.* Second-generation PLINK : rising to the challenge of larger and richer datasets. *Gigascience* **4**, (2015).
11. Benjamini, Y. & Hochberg, Y. Controlling the False Discovery Rate : a Practical and Powerful Approach to Multiple Testing. *J. R. Stat. Soc. B* **57**, 289–300 (1995).
12. Wallace, C. *et al.* Dissection of a Complex Disease Susceptibility Region Using a Bayesian Stochastic Search Approach to Fine Mapping. *PLoS Genet.* **11**, e1005272 (2015).
13. Vösa, U. *et al.* Unraveling the polygenic architecture of complex traits using blood eQTL meta-analysis. *bioRxiv* 1–57 (2018).
14. Giambartolomei, C. *et al.* Bayesian Test for Colocalisation between Pairs of Genetic Association Studies Using Summary Statistics. *PLoS Genet.* **10**, (2014).
15. Fortune, M. D. *et al.* Statistical colocalization of genetic risk variants for related autoimmune diseases in the context of common controls. *Nat. Genet.* **47**, 839–846 (2015).
16. Burren, O. S. *et al.* Chromosome contacts in activated T cells identify autoimmune disease candidate genes. *Genome Biol.* **18**, 165 (2017).
17. Inshaw, J. R. J., Cutler, A. J., Burren, O. S., Stefana, M. I. & Todd, J. A. Approaches and advances in the genetic causes of autoimmune disease and their implications. *Nat. Immunol.* **19**, 674–684 (2018).
18. Miguel-Escalada, I. *et al.* Human pancreatic islet 3D chromatin architecture provides insights into the genetics of type 2 diabetes. *bioRxiv* (2018).
19. Fernandez, J. M. *et al.* The BLUEPRINT Data Analysis Portal. *Cell Syst.* **3**, 491–495 (2016).
20. John, L. B. & Ward, A. C. The Ikaros gene family : Transcriptional regulators of hematopoiesis and immunity. *J. Mol. Immunol.* **48**, 1272–1278 (2011).
21. Wang, J. *et al.* Aiolos Regulates B Cell Activation and Maturation to Effector State. *Immunity* **9**, 543–553 (1998).
22. Cortés, M. & Georgopoulos, K. Aiolos Is Required for the Generation of High Affinity Bone Marrow Plasma Cells Responsible for Long-Term Immunity. *J. Exp. Med.* **199**, 209–219 (2004).
23. Quintana, F. J. *et al.* Aiolos promotes TH17 differentiation by directly silencing Il2 expression. *Nat. Immunol.* **13**, 770–777 (2012).
24. Kwon, H., Chen, H., Mathis, D. & Benoist, C. Different molecular complexes that mediate transcriptional induction and repression by FoxP3. *Nat. Immunol.* **18**, 1238–1248 (2017).
25. Davis, D., Kannan, M. & Wattenberg, B. Orm / ORMDL proteins: Gate guardians and master regulators. *Adv. Biol. Regul.* **70**, 3–18 (2018).
26. Carreras-Sureda, A. *et al.* ORMDL3 modulates store-operated calcium entry and lymphocyte activation. *Hum. Mol. Genet.* **22**, 519–530 (2013).
27. Schmiedel, B. J. *et al.* 17q21 asthma-risk variants switch CTCF binding and regulate IL-2

- production by T cells. *Nat. Commun.* **7**, (2016).
28. Feng, S., Fox, D. & Man, S. M. Mechanisms of Gasdermin Family Members in Inflammasome Signaling and Cell Death. *J. Mol. Biol.* **430**, 3068–3080 (2018).
  29. Panganiban, R. A. *et al.* A functional splice variant associated with decreased asthma risk abolishes the ability of gasdermin B to induce epithelial cell pyroptosis. *J. Allergy Clin. Immunol.* **142**, 1469–1478 (2018).
  30. Turk, B., Turk, D. & Turk, V. Lysosomal cysteine proteases: more than scavengers. *Biochim. Biophys. Acta* **1477**, 98–111 (2000).
  31. Ueno, T. *et al.* Processing of Pulmonary Surfactant Protein B by Napsin and Cathepsin H\*. *J. Biol. Chem.* **279**, 16178–16184 (2004).
  32. Angelo, M. E. D. *et al.* Cathepsin H Is an Additional Convertase of Pro-granzyme B. *J. Biol. Chem.* **285**, 20514–20519 (2010).
  33. Qi, R., Singh, D. & Kao, C. C. Proteolytic Processing Regulates Toll-like Receptor 3 Stability and Endosomal Localization. *J. Biol. Chem.* **287**, 32617–32629 (2012).
  34. Garcia-cattaneo, A., Gobert, F., Müller, M., Toscano, F. & Flores, M. Cleavage of Toll-like receptor 3 by cathepsins B and H is essential for signaling. *PNAS* **109**, 9053–9058 (2012).
  35. Okada, R., Zhang, X., Harada, Y., Wu, Z. & Nakanishi, H. Cathepsin H deficiency in mice induces excess Th1 cell activation and early-onset of EAE though impairment of toll-like receptor 3 cascade. *Inflamm. Res.* **67**, 371–374 (2018).
  36. Guo, H. *et al.* Integration of disease association and eQTL data using a Bayesian colocalisation approach highlights six candidate causal genes in immune-mediated diseases. *Hum. Mol. Genet.* **24**, 3305–3313 (2015).
  37. Kim, Y., Nakanishi, G., Lewandoski, M. & Jetten, A. M. GLIS3 , a novel member of the GLIS subfamily of Kruppel-like zinc finger proteins with repressor and activation functions. *Nucleic Acids Res.* **31**, 5513–5525 (2003).
  38. Yang, Y., Chang, B. H. & Chan, L. Sustained expression of the transcription factor GLIS3 is required for normal beta cell function in adults. *EMBO Mol. Med.* **5**, 92–104 (2013).
  39. Nogueira, T. C. *et al.* GLIS3, a Susceptibility Gene for Type 1 and Type 2 Diabetes , Modulates Pancreatic Beta Cell Apoptosis via Regulation of a Splice Variant of the BH3-Only Protein Bim. *PLoS Genet.* **9**, e1003532 (2013).
  40. Dooley, J. *et al.* Genetic predisposition for beta cell fragility underlies type 1 and type 2 diabetes. *Nat. Genet.* **48**, 519–527 (2016).
  41. Mingari, M. *et al.* Human interleukin-2 promotes proliferation of activated B cells via surface receptors similar to those of activated T cells. *Nature* **312**, 641–643 (1984).
  42. Spolski, R., Li, P. & Leonard, W. J. Biology and regulation of IL-2: from molecular mechanisms to human therapy. *Nat. Rev. Immunol.* **18**, 648–659 (2018).
  43. Moore, K. W., Malefyt, R. D. W., Robert, L. & Garra, A. O. INTERLEUKIN-10 AND THE INTERLEUKIN -10 RECEPTOR. *Annu. Rev. Immunol.* **19**, 683–765 (2001).
  44. Roncarolo, M. G., Gregori, S., Bacchetta, R., Battaglia, M. & Gagliani, N. The Biology of T Regulatory Type 1 Cells and Their Therapeutic Application in Immune-Mediated Diseases. *Immunity* **49**, 1004–1019 (2018).
  45. Mauri, C. & Menon, M. Human regulatory B cells in health and disease: therapeutic potential. *J. Clin. Invest.* **127**, 772–779 (2017).
  46. Ren, B. *et al.* Interleukin 10 (IL-10) and Viral IL-10 Strongly Reduce Antigen-specific Human T Cell Proliferation by Diminishing the Antigen-presenting Capacity of Monocytes via Downregulation of Class II Major Histocompatibility Complex Expression. *J. Exp. Med.* **174**, 915–924 (1991).
  47. Groux, H., Bigler, M., de Vries, J. E. & Roncarolo, M. Interleukin-10 Induces a Long-Term Antigen-specific Anergic State in Human CD4+ T Cells. *J. Exp. Med.* **184**, 19–29 (1996).
  48. Rousset, F. *et al.* Interleukin 10 is a potent growth and differentiation factor for activated human B lymphocytes. *PNAS* **89**, 1890–1893 (1992).
  49. Wang, H., Coligan, J. E. & Morse, H. C. Emerging Functions of Natural IgM and Its Fc Receptor FcμR in Immune Homeostasis. *Front. Immunol.* **7**, 99 (2016).
  50. Ouchida, R. *et al.* Critical role of the IgM Fc receptor in IgM homeostasis , B-cell survival , and humoral immune responses. *PNAS* **109**, E2699–E2706 (2012).
  51. Yu, J. *et al.* Surface receptor Toso controls B cell – mediated regulation of T cell immunity. *J. Clin. Invest.* **128**, 1820–1836 (2018).
  52. Nguyen, T. T. T., Graf, B. A., Randall, T. D. & Baumgarth, N. sIgM - FcμR interactions regulate early B cell activation and plasma cell development after influenza virus infection. *J. Immunol.* **199**, 1635–1646 (2017).



53. Stanford, S. M., Rapini, N. & Bottini, N. Regulation of TCR signalling by tyrosine phosphatases: from immune homeostasis to autoimmunity. *Immunology* **137**, 1–19 (2012).
54. Mehta, M. *et al.* Themis-associated phosphatase activity controls signaling in T cell development. *PNAS* **115**, E11331–E11340 (2018).
55. Choi, S., Cornall, R., Lesourne, R. & Love, P. E. THEMIS : Two Models, Different Thresholds. *Trends Immunol.* **38**, 622–632 (2017).
56. Brooke, G., Holbrook, J. D., Brown, M. H. & Barclay, N. Human Lymphocytes Interact Directly with CD47 through a Novel Member of the Signal Regulatory Protein (SIRP) Family. *J. Immunol.* **173**, 2562–2570 (2004).
57. Stefanidakis, M., Newton, G., Lee, W. Y., Parkos, C. A. & Luscinskas, F. W. Endothelial CD47 interaction with SIRP-gamma is required for human T-cell transendothelial migration under shear flow conditions in vitro. *Immunobiology* **112**, 1280–1289 (2019).
58. Sinha, S. *et al.* An autoimmune disease risk SNP, rs2281808, in SIRPG is associated with reduced expression of SIRP  $\gamma$  and heightened effector state in human CD8 T-cells. *Sci. Rep.* **8**, 15440 (2018).
59. Javierre, B. M. *et al.* Lineage-Specific Genome Architecture Links Enhancers and Non-coding Disease Variants to Target Gene Promoters. *Cell* **167**, 1369–1384 (2016).
60. Eizirik, L. *et al.* The Human Pancreatic Islet Transcriptome: Expression of Candidate Genes for Type 1 Diabetes and the Impact of Pro-Inflammatory Cytokines. *PLoS Genet.* **8**, e1002552 (2012).
